# Supplementary material
Source: PubMed Central journal article supplement (PMC3748366)

## Supplemental Material

### **Clinical Pharmacogenetics Implementation Consortium (CPIC) guidelines for cytochrome P450-2C19 (CYP2C19) genotype and clopidogrel therapy: 2013 Update**

Stuart A. Scott<sup>1</sup>, Katrin Sangkuhl<sup>2</sup>, C. Michael Stein<sup>3</sup>, Jean-Sébastien Hulot<sup>4</sup>, Jessica L. Mega<sup>5</sup>, Dan M. Roden<sup>6</sup>, Teri E. Klein<sup>2</sup>, Marc S. Sabatine<sup>5</sup>, Julie A. Johnson<sup>7</sup>, Alan R. Shuldiner<sup>8</sup>

<sup>1</sup> Department of Genetics and Genomic Sciences, Icahn School of Medicine at Mount Sinai, New York, NY 10029

<sup>2</sup> Department of Genetics, Stanford University, Stanford, CA 94305

<sup>3</sup> Division of Clinical Pharmacology, Departments of Medicine and Pharmacology, Vanderbilt University School of Medicine, Nashville, TN 37232

<sup>4</sup> Université Pierre et Marie Curie-Paris 6, INSERM UMR S 956, Pharmacology Department, Pitié-Salpêtrière University Hospital, Paris, France; and Cardiovascular Research Center, Icahn School of Medicine at Mount Sinai, New York, NY 10029

<sup>5</sup> Thrombolysis in Myocardial Infarction Study Group, Cardiovascular Division, Department of Medicine, Brigham and Women's Hospital and Harvard Medical School, Boston, MA 02115

<sup>6</sup> Departments of Medicine and Pharmacology, Office of Personalized Medicine, Vanderbilt University School of Medicine, Nashville, TN 37232

<sup>7</sup> Department of Pharmacotherapy and Translational Research and Department of Medicine (Cardiology), Colleges of Pharmacy and Medicine; and Center for Pharmacogenomics; University of Florida, Gainesville, FL 32610

<sup>8</sup> Department of Medicine, and Program for Genomic and Personalized Medicine, University of Maryland School of Medicine, Baltimore, MD 21201, and Geriatric Research and Education Clinical Center, Veterans Administration Medical Center, Baltimore, MD 21201

**Corresponding Author:** Alan R. Shuldiner, M.D.  
University of Maryland School of Medicine  
660 West Redwood Street, Room 494  
Baltimore, MD 21201  
Tel: 410-706-1623  
Fax: 410-706-1622  
Email: [cpic@pharmgkb.org](mailto:cpic@pharmgkb.org)

## CPIC Updates

Clinical Pharmacogenetics Implementation Consortium (CPIC) guidelines are published in full on the PharmGKB website ([www.pharmgkb.org](http://www.pharmgkb.org)). Relevant information will be periodically reviewed and updated guidelines will be published online.

---

### CPIC Updates in Supplement v2.1:

- Updated literature review from February 2011 to February 2013.
  - Updated *CYP2C19* genetic testing options and availability.
  - New section on *CYP2C19* sequencing and novel variants.
  - New section on candidate genes.
  - New section on who could be considered for *CYP2C19* genotyping.
  - Updated data linking *CYP2C19* genotype to phenotype.
- 

### Literature Review

The PubMed database (NCBI) was searched using the keywords (CYP2C19 OR cytochrome P450-2C19) AND (clopidogrel) from 1966 to January 2013. Key publications of clinical pharmacogenetic studies on clopidogrel response include: (1-10). For additional reviews and consensus statements, see references: (11-20). For additional information on clopidogrel pharmacogenetics, see PharmGKB: <http://www.pharmgkb.org/clinical/clopidogrel.jsp>.

To construct a *CYP2C19* minor allele frequency table based on ethnicity, the PubMed® database (1966 to January 2011) and Ovid MEDLINE (1950 to January 2011) were searched using the following criteria: ((CYP2C19 or 2C19) AND (genotype OR allele OR frequency OR minor allele OR variant OR ethnic OR race OR racial OR ethnicity)) with filter limits set to retrieve “full-text” and “English” literature. Studies were considered for inclusion if: (1) the ethnicity of the population was clearly indicated; (2) either allele frequencies or alleles for *CYP2C19* genotypes were reported; (3) the method by which *CYP2C19* was genotyped appeared reliable; (4) the sample population consisted of at least 50 individuals; and (5) the study represented publication of novel data (no reviews or meta-analyses). In instances where genotype data from large cohorts of ethnically-diverse individuals were reported, without respect to ethnicity, studies were only considered if one ethnicity was  $\geq 95\%$  of the majority.

The combined analysis grouped subpopulations based on the Human Genome Diversity Project-Centre Etude Polymorphisme Humain (HGDP-CEPH) (21, 22) and included 7,970 Africans, 7,920 Americans, 36,030 East Asians, 121,808 Europeans, 2,140 Middle Easterns, 13,742 Oceanians, and 7,248 South/Central Asians.

### GENE: *CYP2C19*

A gene summary on *CYP2C19* has recently been published (23) and is available online at PharmGKB: <http://www.pharmgkb.org/gene/PA124#tabview=tab3&subtab=31>.

### Genetic Test Interpretation

The haplotype, or star (\*) allele name, is determined by the combination of single nucleotide polymorphisms (SNPs) that are interrogated in the genotyping analysis. Each star (\*) allele is defined by a specific functional SNP or combination of SNP genotypes. For example, the *CYP2C19*\*2 haplotype is defined by the c.681G>A SNP that results in aberrant gene splicing; however, sub-alleles of \*2 have been identified that harbor additional SNPs with limited or no added functional consequence (e.g., *CYP2C19*\*2A, \*2B, \*2C, and \*2D; see <http://www.cypalleles.ki.se/cyp2c19.htm>). Thus, only analyzing the defining SNP (\*2 in this case) is usually sufficient to determine a *CYP2C19* haplotype. The major nucleotide variants that constitute the most commonly tested haplotypes or star (\*) alleles for *CYP2C19*, their respective RefSNP accession ID numbers (<http://www.ncbi.nlm.nih.gov/snp/>), and their effect on the *CYP2C19* protein are summarized in **Supplemental Table S1**. The functional consequences of these variant alleles on *CYP2C19* enzymatic activity are summarized in **Supplemental Table S2** and their multi-ethnic frequencies are listed in **Supplemental Tables S3** and **S4**.

*CYP2C19* genotyping results are reported as a diplotype, which includes one maternal and one paternal star (\*) allele (e.g., \*1/\*2). Notably, one of the inherent limitations in a commercial genotyping test is that rare or previously undiscovered variants will not typically be included in targeted *CYP2C19* testing panels and the wild-type *CYP2C19*\*1 allele is, therefore, assigned in the absence of detected variant alleles. As a result, a potentially function-altering novel or rare *CYP2C19* mutation not included in a commercial genotyping panel would be incorrectly defined as *CYP2C19*\*1. Fortunately, these variant alleles are rare in the general population (although the \*3 loss-of-function allele is prevalent in Asians; **Supplemental Tables S3** and **S4**). Additional predicted metabolizer phenotypes based on *CYP2C19* genotype combinations and their average frequencies are summarized in **Supplemental Table S5**.

### Available Genetic Test Options

Commercially available genetic testing options change over time and a number of different platforms are currently available for *CYP2C19* genotyping, some of which are approved by the U.S. Food and Drug Administration (FDA). In addition, some Clinical Laboratory Improvement Amendments (CLIA)-certified clinical laboratories perform *CYP2C19* testing using analyte-specific reagents as in-house validated Laboratory Developed Tests (LDTs). Consequently, different clinical laboratories may have different variant alleles included in their *CYP2C19* testing panels, which can lead to discrepant results between methodologies (see above, **Genetic Test Interpretation**).

At the time of this writing, three *CYP2C19* genotyping assays have been approved as *in vitro* diagnostic (IVD) tests by the U.S. FDA:

1. AmpliChip<sup>®</sup> CYP450 Test (Roche Molecular Systems, Inc., Pleasanton, CA)
2. Infiniti<sup>®</sup> CYP2C19 Assay (AutoGenomics, Inc., Vista, CA)
3. Verigene<sup>®</sup> CYP2C19 Test (Nanosphere, Inc., Northbrook, IL)

The AmpliChip<sup>®</sup> CYP450 Test interrogates *CYP2C19*\*2 and \*3 (in addition to cytochrome P450-2D6 (*CYP2D6*) variant alleles). Both the Infiniti<sup>®</sup> CYP2C19 Assay and the Verigene<sup>®</sup>

CYP2C19 Test (24, 25) interrogate *CYP2C19*\*2, \*3, and \*17. AutoGenomics, Inc., also offers the expanded Infiniti<sup>®</sup> CYP450 2C19+ Assay that interrogates *CYP2C19*\*2, \*3, \*4, \*5, \*6, \*7, \*8, \*9, \*10 and \*17, which is not currently FDA-approved.

Other commercial *CYP2C19* platforms not currently FDA-approved include the xTAG<sup>™</sup> CYP2C19 Kit from Luminex Molecular Diagnostics (Toronto, ON, Canada) that interrogates *CYP2C19*\*2, \*3, \*4, \*5, \*6, \*7 and \*8, the eSensor<sup>®</sup> 2C19 Test from GenMark Diagnostics, Inc. (Carlsbad, CA) that interrogates *CYP2C19*\*2, \*3, \*4, \*5, \*6, \*7, \*8, \*9, \*10, \*13 and \*17 (26), and the iPLEX<sup>®</sup> ADME CYP2C19 Panel from Sequenom, Inc (San Diego, CA) that interrogates *CYP2C19*\*2 - \*28. Additionally, a rapid point-of-care assay has recently been reported that can genotype *CYP2C19*\*2 directly from a buccal swab in ~1 hour (Spartan Biosciences, Ottawa, ON, Canada) (27).

In addition to commercial assays, other *CYP2C19* LDTs have been reported. Some of which involve real-time PCR allelic-discrimination (TaqMan, Applied Biosystems, Foster City, CA) (5, 28-30), oligonucleotide ligation (SNPlex, Applied Biosystems, Foster City, CA) (5), matrix-assisted laser desorption/ionization time-of-flight mass spectrometry (31), and restriction fragment length polymorphism (RFLP) analyses (1, 32, 33). Pharmacogenomic genotyping panels that include *CYP2C19* are also commercially available, including the Affymetrix DMET<sup>™</sup> Plus Panel Kit (Affymetrix, Santa Clara, CA) (2) and the Illumina<sup>®</sup> VeraCode ADME Core Panel (Illumina, Inc., San Diego, CA). Any clinical genetics or molecular pathology laboratory using any of these assays are still required to implement these tests using established CLIA standards and guidelines.

The 2012 American Medical Association (AMA) Current Procedural Terminology (CPT) procedure code for *CYP2C19* testing is 81225. However, given the number of different molecular assays available to interrogate *CYP2C19*, some laboratories still may use analyte CPT codes for *CYP2C19* testing. It is the responsibility of the service provider to determine proper coding. Insurance provider coverage for *CYP2C19* testing is possible; however, when this is a concern, the insurance provider should be contacted prior to pursuing *CYP2C19* genotyping.

Several CLIA-certified academic and commercial clinical laboratories offer *CYP2C19* testing. In addition to inquiring directly to a specific laboratory regarding test availability and specimen requirements, a voluntary listing of testing providers and related genetic test information is publically available through the Genetic Testing Registry (GTR) of the National Institutes of Health (NIH): <http://www.ncbi.nlm.nih.gov/gtr/>.

### ***CYP2C19* Sequencing and Novel Variants**

In addition to targeted genotyping for *CYP2C19* variant alleles, clinical laboratories may perform full-gene or selected exon *CYP2C19* sequencing. Moreover, emerging clinical genomics programs that perform whole-exome/genome next-generation DNA sequencing are increasingly being deployed across academic medical centers and commercial laboratories and some centers are performing next-generation sequencing with focused pharmacogenomic gene panels (including *CYP2C19*) for both research and clinical use. All of these sequencing programs would capture the common *CYP2C19* variants (e.g., \*2, \*3) but will also identify both rare (e.g., \*4 - \*8) and novel *CYP2C19* variant alleles that have untested clinical significance with respect to

clopidogrel response.

Different clinical laboratories can interpret identified sequence variants using independent criteria; however, consensus nomenclature supported by the American College of Medical Genetics and Genomics (ACMG) (34) includes five categories for identified sequence variants: pathogenic, likely pathogenic, unknown significance, likely benign, and benign. It is the responsibility of the board-certified clinical geneticists at each laboratory to report and classify any novel *CYP2C19* alleles in this testing scenario and to provide an interpretation as to the rationale behind their classification. Although it is challenging to infer any association with clopidogrel response in the context of a novel *CYP2C19* sequence variant, ‘pathogenic’ and ‘likely pathogenic’ variants may act biologically consistent with other common loss-of-function alleles (e.g., \*2, \*3) as these are variants that typically result in an upstream polypeptide frame-shift, premature or mutated stop codon, or canonical splice site mutation. Novel *CYP2C19* variants classified as ‘unknown significance’ (e.g., missense alterations, in-frame insertions/deletions, nonconserved nucleotide substitutions) or ‘likely benign’ should not be assumed to mimic the biological consequences of known *CYP2C19* loss-of-function alleles (e.g., \*2, \*3) and their established roles in clopidogrel response variability.

Of note, previously identified, but rare, *CYP2C19* alleles characterized by missense alterations (e.g., \*9 - \*26) have been subjected to PolyPhen-2 and Sorting Tolerant From Intolerant (SIFT) algorithm analyses to computationally predict their effect on protein function (23). Although not a substitute for actual *in vitro* or *in vivo* enzyme activity analyses, these data can provide a basis for potential variant interpretation and consequences of these sequence alterations on *CYP2C19* enzyme function.

### Other Considerations and Genes

The defining polymorphisms of *CYP2C19*\*2 and \*17 are c.681G>A and c.-806C>T, respectively. There is linkage disequilibrium (LD) between c.681G and c.-806T (e.g.,  $|D'|=1.0$  and  $r^2=0.064$  in CEU HapMap sample;  $|D'|=1.0$  and  $r^2=0.065$  in YRI HapMap sample; and  $|D'|=1.0$  and  $r^2=0.074$  in CHB HapMap sample). This means that the less common \*17 variant (c.-806T) always tracks on the same allele with the more common c.681G. This complicates any interpretation of whether these two variants act independently of one another, and published articles argue both for (29, 35) and against (15, 36, 37) this point. Additional literature and conflicting evidence for a role of *CYP2C19*\*17 in clopidogrel response (including bleeding risk) are summarized in **Supplemental Table S6**.

In addition, the rare *CYP2C19*\*4 (c.1A>G) loss-of-function allele has recently been identified in LD with \*17 (c.-806C>T) in certain ethnic subpopulations and this haplotype is designated *CYP2C19*\*4B (38). Consequently, when genotyping \*17 and not \*4, it is possible that some identified \*17 carriers will actually be \*4B carriers (a loss-of-function allele), particularly if they are of Ashkenazi Jewish ancestry.

*CYP2C19* loss-of-function alleles do not account for all of the variability in clopidogrel response. Other genetic variants with smaller effects and rare variants likely also influence the response to clopidogrel. Some candidate gene and clinical studies have implicated variants in other genes (e.g., *ABCB1* (5, 8), *CES1* (39), *CYP2B6* (2), *CYP2C9* (32, 40, 41), *CYP3A4* (42), *P2RY12* (43),

44), and *PONI* (45)) associated with clopidogrel response; however, these studies have not all been adequately replicated to justify the clinical utility of these genes and variants. In particular, the reported association between *PONI* and clopidogrel pharmacokinetics, pharmacodynamics and clinical outcomes has been refuted by a number of recent reports (46-53) (see below).

### ***ABCB1***

The multidrug resistance protein 1 (MDR1), also known as P-glycoprotein 1 (P-gp), is an ATP-binding cassette (ABC) efflux transporter encoded by *ABCB1* that is involved in the intestinal absorption of clopidogrel. Interindividual variability in *ABCB1* expression and P-gp function is observed and the common synonymous c.3435C>T (rs1045642) allele has been widely studied in association with clopidogrel and other drugs. An early study on the impact of *ABCB1* on clopidogrel absorption reported that *in vitro* clopidogrel efflux clearance was driven by P-gp and that c.3435T homozygotes had lower plasma concentrations of clopidogrel and its active metabolite compared to c.3435C carriers, presumably due to higher *ABCB1* expression associated with the T/T genotype (54). Additional studies have since reported an association between c.3435C>T and increased platelet reactivity (55) and an increased risk of cardiovascular events during clopidogrel treatment (5, 8, 49), while other studies could not support such associations (56-58) or found an opposite effect (9). A meta-analysis examined the risk of high platelet reactivity and poor clinical outcomes with *ABCB1* c.3435C>T carriage during treatment with clopidogrel among coronary artery disease patients and concluded that there was no significant association between c.3435C>T and high platelet reactivity (59). Additionally, long-term risk for major adverse cardiovascular events (MACE), incidence of stent thrombosis, myocardial infarction, or ischemic stroke rate was also not associated with *ABCB1* c.3435C>T. However, c.3435C>T was associated with the risk of long-term MACE among patients treated with a 300 mg clopidogrel loading dose, and c.3435T homozygotes had a lower bleeding outcome rate than c.3435C homozygotes (59). The *ABCB1* c.3435C>T allele was also recently associated with adverse cardiovascular events (in combination with *CYP2C19*\*2) among clopidogrel-treated acute coronary syndrome patients undergoing percutaneous coronary intervention (ACS/PCI) (60). Given the conflicting results surrounding the c.3435C>T allele, further studies are warranted to better understand the relationship between *ABCB1* and clinical outcomes following clopidogrel treatment.

### ***CES1***

Carboxylesterase 1 (*CES1*) catalyzes the transformation of clopidogrel, 2-oxo-clopidogrel, and the thiol metabolites into inactive carboxylate metabolites (45, 61). Two nonsynonymous polymorphisms have been identified, rs71647871 (c.428G>A; G143E) and rs71647872 (D260fs), which alter *CES1* enzyme activity and result in dramatically decreased catalytic activity (62). The minor allele frequency of G143E is estimated to range from ~1-4% in white, black and Hispanic populations, while the D260fs allele is considered rare (62). Given that the majority of the clopidogrel prodrug (85%) is inactivated via *CES1*-mediated hydrolysis (63), reduced function *CES1* alleles potentially could influence clopidogrel metabolism. Importantly, *in vitro* studies of *CES1* enzymatic activity have suggested that the G143E and D260fs alleles completely impair the hydrolysis of clopidogrel and 2-oxo-clopidogrel (64). In addition, the *CES1* G143E variant recently has been associated with significantly higher active clopidogrel metabolite levels and enhanced inhibition of ADP-simulated platelet aggregation (39). Interestingly, the effect size of this uncommon allele on *ex vivo* platelet aggregation was

approximately two-fold greater than *CYP2C19*\*2 (39). A trend toward lower cardiovascular event rates among G143E carriers was also observed; however, this was not statistically significant given the low allele frequency (39). Further studies are warranted to evaluate the effect of *CES1* variants on clinical outcomes during clopidogrel therapy.

### ***P2RY12***

Clopidogrel exerts its mechanism of action by specifically and irreversibly binding to the platelet  $P2RY_{12}$  purinergic receptor (encoded by *P2RY12*), and inhibiting ADP-mediated platelet activation and aggregation. Two functional *P2RY12* haplotypes (H1 and H2) have been identified based on four variants in complete linkage disequilibrium (c.-15+137T>C, c.-15+742C>T, c.-15+799delA, c.36T>G) (43). The minor H2 haplotype was associated with increased platelet aggregation in response to ADP in healthy subjects (43). Recent studies have also suggested a link to peripheral arterial disease risk (65) and a possible association with increased *P2RY12* expression (66). However, some studies investigating the influence of these alleles in connection with clopidogrel response have concluded that the H2 haplotype has no influence on platelet function after treatment with a 600 mg (67) or 300 mg (68, 69) clopidogrel loading dose, or following a longer clopidogrel regime (70) among patients undergoing PCI. In contrast, a healthy volunteers study did identify a minor effect of the H2/H2 genotype based on a significant decrease in inhibition of platelet aggregation compared to H1/H1 and H1/H2 individuals following a week of clopidogrel exposure (75mg/day) (71). Similarly, clopidogrel-treated ACS/PCI patients homozygous for the H2 allele exhibited significantly higher platelet aggregation than patients with at least one H1 allele and were more frequently non-responders (72). Further studies have failed to show associations, including a link to clinical outcomes (5, 57, 73, 74). Based on the conflicting evidence, a clinically relevant influence of common *P2RY12* variants on clopidogrel efficacy is unlikely.

### ***PON1***

Paraoxonase 1 (*PON1*) encodes an esterase and is named after its ability to hydrolyze paroxon as part of the detoxification of the organophosphorus compound parathion. Two *PON1* polymorphisms, rs662 (c.575A>G; Q192R) and rs854560 (c.163T>A; L55M), are commonly studied as both previously have been associated with enzyme activity (75, 76). *PON1* is largely expressed in the liver and is associated with high-density lipoprotein (HDL) particles in human plasma. *PON1* polymorphisms may modulate the effectiveness of HDL particles in protecting low density lipoprotein (LDL) against oxidative modification, which also may affect atherosclerosis risk (77). Notably, *PON1* was previously reported to be the rate-limiting enzyme in the sequential transformation of clopidogrel to its active thiol metabolite (45). In this study, 192Q homozygotes had a significantly higher risk of stent thrombosis compared to 192R homozygotes, lower *PON1* plasma activity, lower plasma concentrations of the active metabolite and lower platelet inhibition (45). Moreover, the unadjusted hazard ratio for risk of stent thrombosis among 192Q versus 192R homozygotes was 12.8 (95% CI, 4.74-90.91) in the discovery cohort and 10.2 (95% CI, 4.39-71.43) in the replication cohort (45).

However, multiple studies failed to replicate the reported association between *PON1* Q192R and active metabolite isomer H4 (clopi-H4) concentration (46), platelet function (46, 47, 56, 78), and cardiovascular outcomes or stent thrombosis during clopidogrel treatment (46-49, 58, 79, 80). Furthermore, a meta-analysis that included 17 studies did not support any association between

*PON1* genotype and on-treatment platelet reactivity or cardiovascular events among clopidogrel-treated coronary patients (53). The reason for these conflicting results remains unclear but may be due to several factors including differences in study design (53, 79, 81). Additionally, available evidence suggests that *PON1* may actually be implicated in underlying cardiovascular disease risk (79), and/or in the formation of a thiol metabolite that has no involvement in antiplatelet response (52). Taken together, the vast majority of data does not support a role for *PON1* as an independent predictor of clopidogrel response and indicate that further study is warranted to determine its possible role in cardiovascular disease risk.

### **Linking Genetic Variability to Variability in Drug-Related Phenotypes**

Clopidogrel response is a highly heritable trait (3) and *CYP2C19*\*2 has been associated with lower active metabolite exposure in clopidogrel treated subjects (2, 32, 82-84). Furthermore, *CYP2C19*\*2 and other loss-of-function variants have been associated with decreased platelet responsiveness to clopidogrel *ex vivo* (1-3, 5, 7, 28, 30, 73, 85). Importantly, a genome-wide association study identified *CYP2C19*\*2 as the major genetic determinant for clopidogrel response, which accounted for ~12% of the association with diminished platelet response (3). Further support for the role of *CYP2C19* in clopidogrel response variability comes from several meta-analyses, which concluded that ACS/PCI patients who carry *CYP2C19* loss-of-function alleles are at increased risk of major adverse cardiovascular events including stent thrombosis (6, 7, 86), even among heterozygotes (6, 7) (**Supplemental Table S7**).

Importantly, lack of effect of *CYP2C19* loss-of-function alleles on adverse cardiovascular outcomes has been reported among clopidogrel-treated patients with lower clinical risks; i.e., in studies with fewer patients undergoing PCI with stenting, and in patients receiving clopidogrel for atrial fibrillation and stroke (87, 88). Consistent with these findings, recent meta-analyses that include the clinical trials with low frequencies of PCI have not been able to support a major role for *CYP2C19* in clopidogrel response variability (89) (**Supplemental Table S7**). Consequently, widespread adoption of *CYP2C19*-guided antiplatelet therapy is not recommended. Rather, this guideline is an example of indication-specific clinical pharmacogenetics whereby *CYP2C19* genotype-directed antiplatelet therapy is limited predominantly to ACS patients undergoing PCI (90, 91). Although there is limited data regarding the potential role of *CYP2C19* for elective PCI cases treated with clopidogrel, these guidelines may also be considered for these patients; however, the lack of FDA-approved indication for prasugrel and ticagrelor for treatment of elective PCI must be balanced with the boxed warning on the clopidogrel label recommending consideration of alternative antiplatelet therapy in poor metabolizers with ACS *or* PCI.

Studies linking *CYP2C19* genotype with variability in clopidogrel response (phenotype) are summarized in **Supplemental Tables S6-S8**, and it is this body of evidence, rather than randomized clinical trials, which provides the basis for the therapeutic recommendations in **Table 2**. These supplemental tables were subdivided based on those studies reporting *CYP2C19* genotype and platelet function/clinical outcomes (**Table S6**), meta-analyses (**Table S7**) and clopidogrel dose escalation (**Table S8**). With alternatives to standard clopidogrel treatment available (e.g., prasugrel, ticagrelor), these studies offer a compelling rationale for pharmacogenetic-guided antiplatelet drug selection for ACS/PCI patients (13, 16).

### ***CYP2C19* Genetic Test Interpretation and Suggested Clinical Actions**



The American College of Cardiology Foundation/American Heart Association previously outlined possible actions by clinicians in response to the boxed warning (16). The article did not recommend *CYP2C19* genetic testing, citing the absence of prospective randomized clinical outcomes trials of genotype-directed antiplatelet therapy. Despite the lack of prospective randomized trials at the time of this writing, the substantial body of evidence from the current literature and potentially more efficacious antiplatelet therapy alternatives currently available may prompt some physicians to modify therapy based on genotype. Additionally, given the current availability of direct-to-consumer genetic testing and other sequencing programs, an increasing number of patients in the near future may already know their *CYP2C19* genotype status at the time of treatment.

It has been suggested that patients considered at moderate or high clinical risk for poor outcomes in the setting of sub-optimal antiplatelet therapy would benefit most from *CYP2C19* genotype-directed therapy. This includes, for example, patients undergoing high-risk multi-vessel PCI procedures, those who have already had an adverse outcome (e.g., stent thrombosis), and/or those with other high-risk clinical (e.g., ACS, diabetes mellitus, chronic kidney failure) or angiographic features.

### **Levels of Evidence Linking Genotype to Phenotype**

Based on previously published criteria (92), a simple scale of high, moderate or weak, to grade the levels of evidence has been implemented:

- **High:** Evidence includes consistent results from well-designed, well-conducted studies.
- **Moderate:** Evidence is sufficient to determine effects, but the strength of the evidence is limited by the number, quality, or consistency of the individual studies; generalizability to routine practice; or indirect nature of the evidence.
- **Weak:** Evidence is insufficient to assess the effects on health outcomes because of limited number or power of studies, important flaws in their design or conduct, gaps in the chain of evidence, or lack of information.

Every effort was made to present evidence from high-quality studies and to take into consideration all available peer-reviewed published literature, which provided the framework for the strength of therapeutic recommendations.

### **Strength of Therapeutic Recommendations**

CPIC's therapeutic recommendations are based on weighting the evidence from a combination of preclinical functional and clinical data, as well as on existing disease-specific consensus guidelines. Some of the factors that are taken into account in evaluating the evidence supporting therapeutic recommendations include: *in vivo* clinical outcome data for clopidogrel, *in vivo* pharmacokinetic and pharmacodynamic data for clopidogrel, *in vitro* enzyme activity of expressed wild-type or variant-containing *CYP2C19*, *in vitro* *CYP2C19* enzyme activity from tissues isolated from individuals of known *CYP2C19* genotypes, *in vivo* pre-clinical pharmacokinetic and pharmacodynamic studies, and *in vitro* studies of *CYP2C19* protein stability or enzyme activity.

Overall, the therapeutic recommendations are simplified to allow rapid interpretation by clinicians. CPIC uses a slight modification of a transparent and simple system for just three categories for recommendations adopted from the rating scale for evidence-based recommendations on the use of retroviral agents (<http://aidsinfo.nih.gov/contentfiles/AdultandAdolescentGL.pdf>): ‘**strong**’, where “the evidence is high quality and the desirable effects clearly outweigh the undesirable effects”; ‘**moderate**’, in which “there is a close or uncertain balance” as to whether the evidence is high quality and the desirable clearly outweigh the undesirable effects; and ‘**optional**’, in which the desirable effects are closely balanced with undesirable effects and there is room for differences in opinion as to the need for the recommended course of action (93, 94).

- **‘Strong’ recommendation for the statement**
- **‘Moderate’ recommendation for the statement**
- **‘Optional’ recommendation for the statement**

**Supplemental Table S1. Commonly tested *CYP2C19* variant alleles and their effect on *CYP2C19* protein**

| Allele <sup>1</sup>     | Major Variation | Nucleotide | dbSNP Number <sup>2</sup> | Effect on <i>CYP2C19</i> Protein |
|-------------------------|-----------------|------------|---------------------------|----------------------------------|
| <i>*1</i>               | -               |            | -                         | -                                |
| <i>*2</i>               | c.681G>A        |            | rs4244285                 | Splicing defect                  |
| <i>*3</i>               | c.636G>A        |            | rs4986893                 | W212X                            |
| <i>*4</i> <sup>3</sup>  | c.1A>G          |            | rs28399504                | M1V                              |
| <i>*5</i>               | c.1297C>T       |            | rs56337013                | R433W                            |
| <i>*6</i>               | c.395G>A        |            | rs72552267                | R132Q                            |
| <i>*7</i>               | c.819+2T>A      |            | rs72558186                | Splicing defect                  |
| <i>*8</i>               | c.358T>C        |            | rs41291556                | W120R                            |
| <i>*17</i> <sup>4</sup> | c.-806C>T       |            | rs12248560                | Increased expression             |

<sup>1</sup> See Human Cytochrome P450 Allele Nomenclature Committee (<http://www.cypalleles.ki.se>) for comprehensive haplotype definitions of *CYP2C19* variant alleles and updated allele information.

<sup>2</sup> RefSNP accession ID number (<http://www.ncbi.nlm.nih.gov/snp/>).

<sup>3</sup> Of note, the *CYP2C19*\*4 loss-of-function allele has been identified in linkage disequilibrium with *\*17* (c.-806C>T) in certain ethnic subpopulations and this haplotype is designated *CYP2C19*\*4B (38).

<sup>4</sup> There is linkage disequilibrium between c.681G and c.-806T (e.g.,  $|D'|=1.0$  and  $r^2=0.064$  in CEU HapMap sample;  $|D'|=1.0$  and  $r^2=0.065$  in YRI HapMap sample; and  $|D'|=1.0$  and  $r^2=0.074$  in CHB HapMap sample). This means that the less common *\*17* variant (c.-806T) always tracks on the same allele with the more common c.681G. This complicates any interpretation of whether these two variants act independently of one another, and published articles argue both for (29, 35) and against (15, 36, 37) this point.

**Supplemental Table S2. Association between *CYP2C19* allelic variants and enzyme activity**

| <b>Functional Status</b>                              | <b>Alleles</b>             | <b>References</b> |
|-------------------------------------------------------|----------------------------|-------------------|
| Functional / normal activity / wild-type <sup>1</sup> | *1                         | (95)              |
| Loss-of-function / no or decreased activity           | *2, *3, *4, *5, *6, *7, *8 | (96-102)          |
| Increased function / increased activity               | *17                        | (103-105)         |

<sup>1</sup> An important caveat for all genotyping tests is that the “wild-type” (\*1) status is reported if all other alleles that are measured are absent. Some genotype tests do not interrogate the rare loss-of-function alleles and therefore, if present, would be erroneously reported as “wild-type”. It is also possible that a novel un-interrogated *CYP2C19* sequence variant may confer altered enzyme function in an individual, and thus lead to the possibility of a loss-of-function allele being erroneously called as “wild-type” (\*1).

**Supplemental Table S3. Frequencies<sup>1</sup> of *CYP2C19* alleles in major race/ethnic groups<sup>2</sup>**

| Allele                 | African | American | East Asian | European | Middle Eastern | Oceanian | South/Central Asian |
|------------------------|---------|----------|------------|----------|----------------|----------|---------------------|
| <i>*1</i> <sup>3</sup> | 0.68    | 0.69     | 0.60       | 0.63     | 0.87           | 0.24     | 0.62                |
| <i>*2</i>              | 0.15    | 0.12     | 0.29       | 0.15     | 0.12           | 0.61     | 0.35                |
| <i>*3</i>              | 0.0052  | 0.00028  | 0.089      | 0.0042   | 0.011          | 0.15     | 0.024               |
| <i>*4</i>              | 0.00093 | 0.0024   | 0.00049    | 0.0025   | ND             | ND       | 0.00                |
| <i>*5</i>              | ND      | 0.00     | 0.00062    | 0.000073 | ND             | ND       | 0.00                |
| <i>*6</i>              | 0.00    | 0.00     | 0.00       | 0.00017  | ND             | ND       | 0.00                |
| <i>*7</i>              | ND      | ND       | ND         | 0.00     | ND             | ND       | ND                  |
| <i>*8</i>              | 0.00    | 0.0012   | 0.00       | 0.0035   | ND             | ND       | ND                  |
| <i>*17</i>             | 0.16    | 0.18     | 0.027      | 0.21     | ND             | ND       | ND                  |

ND: not determined.

<sup>1</sup> Average frequencies are based on actual numbers of subjects with each allele reported in multiple studies. See **Supplemental Table S4** for details and references.

<sup>2</sup> Worldwide race/ethnic designations correspond to the Human Genome Diversity Project-Centre Etude Polymorphisme Humain (HGDP-CEPH) (21, 22) as indicated in **Supplemental Table S4**.

<sup>3</sup> Note that because *CYP2C19\*1* is not genotyped directly, its inferred frequency is calculated as: 1 - (sum of variant allele frequencies).

Supplemental Table S4. *CYP2C19* minor allele frequencies

| HGDP-CEPH Grouping <sup>1</sup> | Ethnicity              | PMID <sup>2</sup> | CYP2C19 minor allele frequency (%) <sup>3</sup> |     |     |     |    |    |     |                  | Total Individuals | Total Alleles | CYP2C19 minor alleles reported <sup>3</sup> |    |    |    |    |    |    |                  |  |
|---------------------------------|------------------------|-------------------|-------------------------------------------------|-----|-----|-----|----|----|-----|------------------|-------------------|---------------|---------------------------------------------|----|----|----|----|----|----|------------------|--|
|                                 |                        |                   | *2                                              | *3  | *4  | *5  | *6 | *7 | *8  | *17 <sup>4</sup> |                   |               | *2                                          | *3 | *4 | *5 | *6 | *7 | *8 | *17 <sup>4</sup> |  |
| Africa                          | African                | 20173083          | 19.2                                            | 0.2 | 0   | -   | 0  | -  | 0   | -                | 250               | 500           | 96                                          | 1  | 0  | -  | 0  | -  | 0  | -                |  |
| Africa                          | African American       | 16815315          | 18.2                                            | 0.8 | -   | -   | -  | -  | -   | -                | 236               | 472           | 86                                          | 4  | -  | -  | -  | -  | -  | -                |  |
| Africa                          | African-American       | 9110363           | 25                                              | 0   | -   | -   | -  | -  | -   | -                | 108               | 216           | 54                                          | 0  | -  | -  | -  | -  | -  | -                |  |
| Africa                          | African-American       | 19169185          | 18.3                                            | 0.1 | -   | -   | -  | -  | -   | -                | 441               | 882           | 161                                         | 1  | -  | -  | -  | -  | -  | -                |  |
| Africa                          | African-American       | 8873222           | 19.1                                            | -   | -   | -   | -  | -  | -   | -                | 76                | 152           | 29                                          | -  | -  | -  | -  | -  | -  | -                |  |
| Africa                          | African-American       | 8823231           | 16.0                                            | -   | -   | -   | -  | -  | -   | -                | 100               | 200           | 32                                          | -  | -  | -  | -  | -  | -  | -                |  |
| Africa                          | Beninese               | 14616425          | 13                                              | -   | -   | -   | -  | -  | -   | -                | 111               | 222           | 29                                          | -  | -  | -  | -  | -  | -  | -                |  |
| Africa                          | Black                  | 21247447          | 19.9                                            | 0   | -   | -   | 0  | -  | 0   | -                | 289               | 578           | 115                                         | 0  | 1  | -  | 0  | -  | 0  | 120              |  |
| Africa                          | Cape Mixed Ancestry    | 20712527          | 17                                              | 7   | -   | -   | -  | -  | -   | 14               | 75                | 150           | 26                                          | 11 | -  | -  | -  | -  | -  | 21               |  |
| Africa                          | Egyptian               | 12047484          | 10.9                                            | 0.2 | -   | -   | -  | -  | -   | -                | 247               | 494           | 54                                          | 1  | -  | -  | -  | -  | -  | -                |  |
| Africa                          | Ethiopian              | 9014201           | 14                                              | 2   | -   | -   | -  | -  | -   | -                | 114               | 228           | 32                                          | 5  | -  | -  | -  | -  | -  | -                |  |
| Africa                          | Ethiopian              | 12142727          | 12.1                                            | 2.9 | -   | -   | -  | -  | -   | -                | 70                | 140           | 17                                          | 4  | -  | -  | -  | -  | -  | -                |  |
| Africa                          | Ethiopian              | 16413245          | -                                               | -   | -   | -   | -  | -  | -   | 13.2             | 190               | 380           | -                                           | -  | -  | -  | -  | -  | -  | 50               |  |
| Africa                          | Ghanaian               | 19954515          | 5.9                                             | 0   | -   | -   | -  | -  | -   | -                | 169               | 338           | 20                                          | 0  | -  | -  | -  | -  | -  | -                |  |
| Africa                          | Nigerian               | 20831548          | 15.5                                            | 0   | -   | -   | -  | -  | -   | -                | 158               | 316           | 49                                          | 0  | -  | -  | -  | -  | -  | -                |  |
| Africa                          | South African (Venda)  | 11372584          | 21.7                                            | 0   | -   | -   | -  | -  | -   | -                | 76                | 152           | 33                                          | 0  | -  | -  | -  | -  | -  | -                |  |
| Africa                          | Tanzanian              | 10510152          | 10                                              | 0   | -   | -   | -  | -  | -   | -                | 195               | 390           | 39                                          | 0  | -  | -  | -  | -  | -  | -                |  |
| Africa                          | Tanzanian              | 9797796           | 17.9                                            | 0.6 | -   | -   | -  | -  | -   | -                | 251               | 502           | 90                                          | 3  | -  | -  | -  | -  | -  | -                |  |
| Africa                          | Tanzanian              | 11372584          | 18.0                                            | 0.3 | -   | -   | -  | -  | -   | -                | 192               | 384           | 69                                          | 1  | -  | -  | -  | -  | -  | -                |  |
| Africa                          | Tunisian               | 18423013          | 10.5                                            | -   | -   | -   | -  | -  | -   | -                | 544               | 1088          | 114                                         | -  | -  | -  | -  | -  | -  | -                |  |
| Africa                          | Ugandan                | 19002442          | 12.6                                            | 1.0 | -   | -   | -  | -  | -   | 17.2             | 99                | 198           | 25                                          | 2  | -  | -  | -  | -  | -  | 34               |  |
| Africa                          | Xhosa                  | 20712527          | 21                                              | 0   | -   | -   | -  | -  | -   | 10               | 100               | 200           | 42                                          | 0  | -  | -  | -  | -  | -  | 20               |  |
| Africa                          | Zimbabwean Shona       | 7781265           | 4.2                                             | -   | -   | -   | -  | -  | -   | -                | 84                | 168           | 7                                           | -  | -  | -  | -  | -  | -  | -                |  |
|                                 |                        |                   |                                                 |     |     |     |    |    |     |                  |                   |               |                                             |    |    |    |    |    |    |                  |  |
| Americas                        | Bolivian               | 15776277          | 7.8                                             | 0.1 | -   | -   | -  | -  | -   | -                | 778               | 1556          | 121                                         | 1  | -  | -  | -  | -  | -  | -                |  |
| Americas                        | Brazilian (mixed)      | 21247447          | 16.1                                            | 0   | 0.3 | 0   | -  | -  | -   | 19.2             | 1212              | 2424          | 390                                         | 0  | 7  | 0  | -  | -  | -  | 466              |  |
| Americas                        | Brazilian (mixed)      | 211173785         | 13.2                                            | -   | -   | -   | -  | -  | -   | -                | 1034              | 2068          | 273                                         | 1  | -  | -  | -  | -  | -  | 358              |  |
| Americas                        | Columbian Mestizo      | 17623107          | 8.7                                             | 0   | 0   | 0   | 0  | -  | 0   | -                | 189               | 378           | 33                                          | 0  | 0  | 0  | 0  | -  | 0  | -                |  |
| Americas                        | Mexican Americans      | 16815315          | 9.7                                             | 0.1 | -   | -   | -  | -  | -   | -                | 346               | 692           | 67                                          | -  | -  | -  | -  | -  | -  | -                |  |
| Americas                        | Native Canadian Indian | 9797794           | 8.8                                             | 0   | -   | -   | -  | -  | -   | -                | 159               | 318           | 28                                          | 0  | -  | -  | -  | -  | -  | -                |  |
| Americas                        | White Hispanic         | 21247447          | 12.6                                            | 0   | 0.2 | -   | 0  | -  | 0.2 | 14.0             | 242               | 484           | 61                                          | 0  | 1  | -  | 0  | -  | 1  | 68               |  |
|                                 |                        |                   |                                                 |     |     |     |    |    |     |                  |                   |               |                                             |    |    |    |    |    |    |                  |  |
| East Asia                       | Bai Chinese            | 9103550           | 25.7                                            | 5.2 | -   | 0.3 | -  | -  | -   | -                | 202               | 404           | 104                                         | 21 | -  | 1  | -  | -  | -  | -                |  |

|           |             |          |             |             |            |          |            |   |          |            |     |      |            |           |   |   |   |   |   |          |
|-----------|-------------|----------|-------------|-------------|------------|----------|------------|---|----------|------------|-----|------|------------|-----------|---|---|---|---|---|----------|
| East Asia | Burmese     | 16946555 | <b>30</b>   | <b>4</b>    | -          | -        | -          | - | -        | -          | 127 | 254  | 76         | 10        | - | - | - | - | - | -        |
| East Asia | Chinese     | 15327595 | 23.1        | 4.6         | -          | -        | -          | - | -        | -          | 54  | 108  | <b>25</b>  | <b>5</b>  | - | - | - | - | - | -        |
| East Asia | Chinese     | 18231117 | <b>29.7</b> | <b>3.5</b>  | <b>0</b>   | <b>0</b> | -          | - | -        | <b>0.5</b> | 101 | 202  | 60         | 7         | 0 | 0 | - | - | - | 1        |
| East Asia | Chinese     | 19636337 | <b>25.5</b> | <b>2</b>    | <b>0.5</b> | -        | -          | - | -        | <b>3</b>   | 100 | 200  | 51         | 4         | 4 | - | - | - | - | 6        |
| East Asia | Chinese     | 20173083 | <b>30.7</b> | <b>4.5</b>  | <b>0</b>   | -        | <b>0</b>   | - | <b>0</b> | -          | 398 | 796  | 244        | 36        | 0 | - | 0 | - | 0 | -        |
| East Asia | Chinese     | 16855453 | 30.2        | 6.6         | -          | -        | -          | - | -        | -          | 53  | 106  | <b>32</b>  | <b>7</b>  | - | - | - | - | - | -        |
| East Asia | Chinese     | 17450472 | 29.7        | 5.9         | -          | -        | -          | - | -        | -          | 59  | 118  | <b>35</b>  | <b>7</b>  | - | - | - | - | - | -        |
| East Asia | Chinese     | 11686476 | 44.2        | 4.5         | -          | -        | -          | - | -        | -          | 121 | 242  | <b>107</b> | <b>11</b> | - | - | - | - | - | -        |
| East Asia | Chinese     | 19745563 | 24.8        | 7.0         | -          | -        | -          | - | -        | -          | 107 | 214  | <b>53</b>  | <b>15</b> | - | - | - | - | - | -        |
| East Asia | Chinese     | 20831535 | 30.6        | 3.7         | -          | -        | -          | - | -        | -          | 204 | 408  | <b>125</b> | <b>15</b> | - | - | - | - | - | -        |
| East Asia | Chinese     | 19756559 | 30.7        | 7.1         | -          | -        | -          | - | -        | -          | 287 | 574  | <b>176</b> | <b>41</b> | - | - | - | - | - | -        |
| East Asia | Chinese     | 21163112 | 23.1        | -           | -          | -        | -          | - | -        | -          | 722 | 1444 | <b>334</b> | -         | - | - | - | - | - | -        |
| East Asia | Chinese     | 15301728 | <b>35</b>   | <b>7</b>    | -          | -        | -          | - | -        | -          | 70  | 140  | 49         | 10        | - | - | - | - | - | -        |
| East Asia | Dai Chinese | 11956668 | <b>30.3</b> | <b>3.4</b>  | -          | -        | -          | - | -        | -          | 386 | 772  | 234        | 26        | - | - | - | - | - | -        |
| East Asia | East Asian  | 20173083 | <b>32.4</b> | <b>8</b>    | <b>0</b>   | -        | <b>0</b>   | - | <b>0</b> | -          | 246 | 492  | 159        | 39        | 0 | - | 0 | - | 0 | -        |
| East Asia | East Asian  | 16815315 | <b>28.9</b> | <b>9.6</b>  | -          | -        | -          | - | -        | -          | 161 | 322  | 93         | 31        | - | - | - | - | - | -        |
| East Asia | Han Chinese | 18518848 | <b>24.7</b> | <b>3.3</b>  | -          | -        | -          | - | -        | <b>1.6</b> | 400 | 800  | 198        | 26        | - | - | - | - | - | 13       |
| East Asia | Han Chinese | 19444287 | 29.1        | 7.3         | -          | -        | -          | - | -        | -          | 103 | 206  | <b>60</b>  | <b>15</b> | - | - | - | - | - | -        |
| East Asia | Han Chinese | 15612662 | 34.1        | 8.2         | -          | -        | -          | - | -        | -          | 104 | 208  | <b>71</b>  | <b>17</b> | - | - | - | - | - | -        |
| East Asia | Han Chinese | 9103550  | <b>36.6</b> | <b>7.4</b>  | -          | -        | -          | - | -        | -          | 101 | 202  | 74         | 15        | - | - | - | - | - | -        |
| East Asia | Han Chinese | 10585366 | <b>30.7</b> | <b>3.8</b>  | <b>0.4</b> | <b>0</b> | -          | - | -        | -          | 119 | 238  | 73         | 9         | 9 | 0 | - | - | - | -        |
| East Asia | Japanese    | 19881258 | 14.5        | 8.2         | -          | -        | -          | - | -        | -          | 55  | 110  | <b>16</b>  | <b>9</b>  | - | - | - | - | - | -        |
| East Asia | Japanese    | 20173083 | <b>30.3</b> | <b>13.1</b> | <b>0</b>   | -        | <b>0.1</b> | - | <b>0</b> | -          | 500 | 1000 | 303        | 131       | 0 | - | - | - | 0 | -        |
| East Asia | Japanese    | 16141610 | 26.7        | 12.8        | -          | -        | -          | - | -        | -          | 253 | 506  | <b>135</b> | <b>65</b> | - | - | - | - | - | <b>4</b> |
| East Asia | Japanese    | 9867757  | 28.2        | 6.5         | -          | -        | -          | - | -        | -          | 62  | 124  | <b>35</b>  | <b>8</b>  | - | - | - | - | - | -        |
| East Asia | Japanese    | 16595916 | 28.7        | 8.3         | -          | -        | -          | - | -        | -          | 54  | 108  | <b>31</b>  | <b>9</b>  | - | - | - | - | - | -        |
| East Asia | Japanese    | 20528170 | 32.4        | 10.8        | -          | -        | -          | - | -        | -          | 51  | 102  | <b>33</b>  | <b>11</b> | - | - | - | - | - | -        |
| East Asia | Japanese    | 16338280 | 34.1        | 11.1        | -          | -        | -          | - | -        | -          | 63  | 126  | <b>43</b>  | <b>14</b> | - | - | - | - | - | -        |
| East Asia | Japanese    | 10579481 | 25.5        | 6.5         | -          | -        | -          | - | -        | -          | 108 | 216  | <b>55</b>  | <b>14</b> | - | - | - | - | - | -        |
| East Asia | Japanese    | 12386647 | 30.0        | 11.5        | -          | -        | -          | - | -        | -          | 65  | 130  | <b>39</b>  | <b>15</b> | - | - | - | - | - | -        |
| East Asia | Japanese    | 11477314 | 29.4        | 11.3        | -          | -        | -          | - | -        | -          | 80  | 160  | <b>47</b>  | <b>18</b> | - | - | - | - | - | -        |
| East Asia | Japanese    | 19259653 | 24.6        | 9.3         | -          | -        | -          | - | -        | -          | 124 | 248  | <b>61</b>  | <b>23</b> | - | - | - | - | - | -        |
| East Asia | Japanese    | 17377957 | 20.5        | 17.1        | -          | -        | -          | - | -        | -          | 73  | 146  | <b>30</b>  | <b>25</b> | - | - | - | - | - | -        |
| East Asia | Japanese    | 11434512 | 28.2        | 12.9        | -          | -        | -          | - | -        | -          | 101 | 202  | <b>57</b>  | <b>26</b> | - | - | - | - | - | -        |
| East Asia | Japanese    | 11686476 | 26.0        | 14.6        | -          | -        | -          | - | -        | -          | 96  | 192  | <b>50</b>  | <b>28</b> | - | - | - | - | - | -        |
| East Asia | Japanese    | 9860067  | 24.6        | 10.4        | -          | -        | -          | - | -        | -          | 134 | 268  | <b>66</b>  | <b>28</b> | - | - | - | - | - | -        |
| East Asia | Japanese    | 15952098 | 31.6        | 11.3        | -          | -        | -          | - | -        | -          | 141 | 282  | <b>89</b>  | <b>32</b> | - | - | - | - | - | -        |
| East Asia | Japanese    | 15710002 | 24.0        | 11.0        | -          | -        | -          | - | -        | -          | 173 | 346  | <b>83</b>  | <b>38</b> | - | - | - | - | - | -        |

|           |                              |          |      |      |   |   |   |   |   |     |     |     |     |     |   |   |   |   |   |    |
|-----------|------------------------------|----------|------|------|---|---|---|---|---|-----|-----|-----|-----|-----|---|---|---|---|---|----|
| East Asia | Japanese                     | 9511186  | 23.4 | 11.1 | - | - | - | - | - | -   | 175 | 350 | 82  | 39  | - | - | - | - | - | -  |
| East Asia | Japanese                     | 21168310 | 30.8 | 10.0 | - | - | - | - | - | -   | 201 | 402 | 124 | 40  | - | - | - | - | - | -  |
| East Asia | Japanese                     | 8988068  | 28.8 | 12.4 | - | - | - | - | - | -   | 186 | 372 | 107 | 46  | - | - | - | - | - | -  |
| East Asia | Japanese                     | 14568772 | 27.3 | 12.0 | - | - | - | - | - | -   | 196 | 392 | 107 | 47  | - | - | - | - | - | -  |
| East Asia | Japanese                     | 19156902 | 31.7 | 13.5 | - | - | - | - | - | -   | 178 | 356 | 113 | 48  | - | - | - | - | - | -  |
| East Asia | Japanese                     | 16307177 | 29.6 | 12.8 | - | - | - | - | - | -   | 203 | 406 | 120 | 52  | - | - | - | - | - | -  |
| East Asia | Japanese                     | 11240980 | 31.0 | 10.9 | - | - | - | - | - | -   | 261 | 522 | 162 | 57  | - | - | - | - | - | -  |
| East Asia | Japanese                     | 17215846 | 27.8 | 12.3 | - | - | - | - | - | -   | 300 | 600 | 167 | 74  | - | - | - | - | - | -  |
| East Asia | Japanese                     | 15017629 | 28.7 | 11.6 | - | - | - | - | - | -   | 350 | 700 | 201 | 81  | - | - | - | - | - | -  |
| East Asia | Japanese                     | 17357148 | 27.7 | 14.3 | - | - | - | - | - | -   | 352 | 704 | 195 | 101 | - | - | - | - | - | -  |
| East Asia | Japanese                     | 16268979 | 27.6 | 13.1 | - | - | - | - | - | -   | 426 | 852 | 235 | 112 | - | - | - | - | - | -  |
| East Asia | Japanese                     | 17052843 | 31.1 | 14.6 | - | - | - | - | - | -   | 487 | 974 | 303 | 142 | - | - | - | - | - | -  |
| East Asia | Japanese                     | 16338278 | 15.4 | -    | - | - | - | - | - | -   | 205 | 410 | 63  | -   | - | - | - | - | - | -  |
| East Asia | Japanese                     | 21102498 | 28.4 | -    | - | - | - | - | - | -   | 58  | 116 | 33  | -   | - | - | - | - | - | -  |
| East Asia | Japanese                     | 9110363  | 23   | 10.4 | - | - | - | - | - | -   | 53  | 106 | 24  | 11  | - | - | - | - | - | -  |
| East Asia | Japanese                     | 8807668  | 27.4 | 10.8 | - | - | - | - | - | -   | 217 | 434 | 119 | 47  | - | - | - | - | - | -  |
| East Asia | Japanese                     | 9631918  | 35   | 11   | - | - | - | - | - | -   | 140 | 280 | 98  | 31  | - | - | - | - | - | -  |
| East Asia | Japanese                     | 8890945  | 21.9 | 11.7 | - | - | - | - | - | -   | 233 | 466 | 102 | 55  | - | - | - | - | - | -  |
| East Asia | Japanese                     | 17502835 | 31.1 | 12.6 | - | - | - | - | - | -   | 103 | 206 | 64  | 26  | - | - | - | - | - | -  |
| East Asia | Japanese                     | 11763000 | 27.5 | 12.8 | - | - | - | - | - | -   | 51  | 102 | 28  | 13  | - | - | - | - | - | -  |
| East Asia | Japanese                     | 19696793 | 26   | 13   | - | - | - | - | - | -   | 219 | 438 | 114 | 57  | - | - | - | - | - | -  |
| East Asia | Japanese                     | 15691505 | 32.7 | 13.7 | - | - | - | - | - | -   | 139 | 278 | 91  | 38  | - | - | - | - | - | -  |
| East Asia | Japanese                     | 19696793 | 31   | 18   | - | - | - | - | - | -   | 184 | 368 | 114 | 66  | - | - | - | - | - | -  |
| East Asia | Japanese                     | 18241287 | -    | -    | - | - | - | - | - | 1.3 | 265 | 530 | -   | -   | - | - | - | - | - | 7  |
| East Asia | Japanese (1st generation)    | 18231117 | 26.2 | 10   | 0 | 0 | - | - | - | 1   | 105 | 210 | 55  | 21  | 0 | 0 | - | - | - | 2  |
| East Asia | Japanese (3rd generation)    | 18231117 | 33.1 | 13.3 | 0 | 0 | - | - | - | 1.2 | 84  | 168 | 56  | 22  | 0 | 0 | - | - | - | 2  |
| East Asia | Japanese (native)            | 18231117 | 34.5 | 9    | 0 | 0 | - | - | - | 0.5 | 100 | 200 | 69  | 18  | 0 | 0 | - | - | - | 1  |
| East Asia | Japanese (mixed descendents) | 19882083 | 25.9 | 11.9 | - | - | - | - | - | -   | 139 | 278 | 72  | 33  | - | - | - | - | - | -  |
| East Asia | Karen                        | 16946555 | 28   | 1    | - | - | - | - | - | -   | 131 | 262 | 73  | -   | - | - | - | - | - | -  |
| East Asia | Kazakh Chinese               | 19444287 | 15.4 | 7.9  | - | - | - | - | - | -   | 107 | 214 | 33  | 17  | - | - | - | - | - | -  |
| East Asia | Korean                       | 18231117 | 25   | 8    | 0 | 0 | - | - | - | 1.5 | 100 | 200 | 50  | 16  | 0 | 0 | - | - | - | 3  |
| East Asia | Korean                       | 20499227 | 16   | -    | - | - | - | - | - | 20  | 150 | 300 | 48  | -   | - | - | - | - | - | 60 |
| East Asia | Korean                       | 20173083 | 28.6 | 7.4  | 0 | - | 0 | - | 0 | -   | 200 | 400 | 114 | 30  | 0 | - | 0 | - | 0 | -  |
| East Asia | Korean                       | 17424941 | 31.1 | 7.6  | - | - | - | - | - | -   | 66  | 132 | 41  | 10  | - | - | - | - | - | -  |
| East Asia | Korean                       | 19220726 | 34.9 | 6.6  | - | - | - | - | - | -   | 136 | 272 | 95  | 18  | - | - | - | - | - | -  |
| East Asia | Korean                       | 17562299 | 21.1 | 9.8  | - | - | - | - | - | -   | 97  | 194 | 41  | 19  | - | - | - | - | - | -  |
| East Asia | Korean                       | 20650435 | 31.0 | 8.7  | - | - | - | - | - | -   | 126 | 252 | 78  | 22  | - | - | - | - | - | -  |
| East Asia | Korean                       | 20724801 | 31.3 | 6.5  | - | - | - | - | - | -   | 176 | 352 | 110 | 23  | - | - | - | - | - | -  |



|           |                   |          |      |      |     |   |     |   |     |      |      |      |     |    |   |   |   |   |     |
|-----------|-------------------|----------|------|------|-----|---|-----|---|-----|------|------|------|-----|----|---|---|---|---|-----|
| East Asia | Korean            | 9014204  | 20.9 | 11.7 | -   | - | -   | - | -   | -    | 103  | 206  | 43  | 24 | - | - | - | - | -   |
| East Asia | Korean            | 14695703 | 26.7 | 10.3 | -   | - | -   | - | -   | -    | 116  | 232  | 62  | 24 | - | - | - | - | -   |
| East Asia | Korean            | 20823393 | 34.0 | 9.7  | -   | - | -   | - | -   | -    | 134  | 268  | 91  | 26 | - | - | - | - | -   |
| East Asia | Korean            | 21075428 | 30.3 | 6.8  | -   | - | -   | - | -   | -    | 190  | 380  | 115 | 26 | - | - | - | - | -   |
| East Asia | Korean            | 19891553 | -    | 8.8  | -   | - | -   | - | -   | -    | 226  | 452  | -   | 40 | - | - | - | - | -   |
| East Asia | Korean            | 18637061 | 26.0 | 8.7  | -   | - | -   | - | -   | -    | 327  | 654  | 170 | 57 | - | - | - | - | -   |
| East Asia | Korean            | 17667801 | 28.2 | 7.6  | -   | - | -   | - | -   | -    | 377  | 754  | 213 | 57 | - | - | - | - | -   |
| East Asia | Korean            | 19576320 | 27.3 | 9.3  | -   | - | -   | - | -   | -    | 387  | 774  | 211 | 72 | - | - | - | - | -   |
| East Asia | Korean            | 20559522 | 29.9 | 9.5  | -   | - | -   | - | -   | -    | 463  | 926  | 277 | 88 | - | - | - | - | -   |
| East Asia | Korean            | 21054462 | 28.4 | 10.1 | -   | - | -   | - | -   | 1.5  | 271  | 542  | 154 | 55 | - | - | - | - | 8   |
| East Asia | Li Chinese        | 17439410 | 35.8 | 3.0  | -   | - | -   | - | -   | -    | 165  | 330  | 118 | 10 | - | - | - | - | -   |
| East Asia | Malay             | 15327595 | 30.9 | 10.3 | -   | - | -   | - | -   | -    | 68   | 136  | 42  | 14 | - | - | - | - | -   |
| East Asia | Mongolian Chinese | 20857895 | 24.3 | 4.3  | -   | - | -   | - | -   | -    | 280  | 560  | 136 | 24 | - | - | - | - | -   |
| East Asia | Northeastern Thai | 11927837 | 26.6 | 2.3  | -   | - | -   | - | -   | -    | 107  | 214  | 57  | 5  | - | - | - | - | -   |
| East Asia | Southeast Asian   | 16815315 | 31.2 | 5.7  | -   | - | -   | - | -   | -    | 80   | 160  | 50  | 9  | - | - | - | - | -   |
| East Asia | Taiwanese         | 20350136 | 32   | 2.5  | -   | - | -   | - | -   | 0.5  | 100  | 200  | 64  | 5  | - | - | - | - | 1   |
| East Asia | Taiwanese         | 16924387 | 32.2 | 5.0  | -   | - | -   | - | -   | -    | 180  | 360  | 116 | 18 | - | - | - | - | -   |
| East Asia | Taiwanese         | 20457439 | 57.9 | 20.0 | -   | - | -   | - | -   | -    | 95   | 190  | 110 | 38 | - | - | - | - | -   |
| East Asia | Taiwanese         | 15385837 | 34   | 5.3  | -   | - | -   | - | -   | -    | 169  | 338  | 115 | 18 | - | - | - | - | -   |
| East Asia | Taiwanese         | 9110363  | 32   | 5.5  | -   | - | -   | - | -   | -    | 118  | 236  | 76  | 13 | - | - | - | - | -   |
| East Asia | Thai              | 11686476 | 34.7 | 4.5  | -   | - | -   | - | -   | -    | 121  | 242  | 84  | 11 | - | - | - | - | -   |
| East Asia | Thai              | 20358205 | 24.6 | -    | -   | - | -   | - | -   | -    | 71   | 142  | 35  | -  | - | - | - | - | -   |
| East Asia | Thai              | 16946555 | 29   | 3    | -   | - | -   | - | -   | -    | 774  | 1548 | 449 | 46 | - | - | - | - | -   |
| East Asia | Vietnamese        | 18979093 | 30.6 | 6.3  | -   | - | -   | - | -   | -    | 72   | 144  | 44  | 9  | - | - | - | - | -   |
| East Asia | Vietnamese        | 17667801 | 26.4 | 4.8  | -   | - | -   | - | -   | -    | 165  | 330  | 87  | 16 | - | - | - | - | -   |
| East Asia | Vietnamese        | 11686476 | 26.7 | 13.3 | -   | - | -   | - | -   | -    | 90   | 180  | 48  | 24 | - | - | - | - | -   |
| Europe    | Ashkenazi Jewish  | 18240905 | 15.2 | -    | 1.8 | - | -   | - | -   | -    | 250  | 500  | 76  | -  | 9 | - | - | - | -   |
| Europe    | Belgian           | 14616425 | 9.1  | -    | -   | - | -   | - | -   | -    | 121  | 242  | 22  | -  | - | - | - | - | -   |
| Europe    | Bosnian           | 21108610 | 16.9 | -    | -   | - | -   | - | -   | -    | 77   | 154  | 26  | -  | - | - | - | - | -   |
| Europe    | Bulgarian         | 18021343 | 13.5 | -    | -   | - | -   | - | -   | -    | 96   | 192  | 26  | -  | - | - | - | - | -   |
| Europe    | Caucasian         | 18231117 | 13.6 | 0    | 0.3 | 0 | -   | - | -   | 20.1 | 143  | 286  | 39  | 0  | 1 | 0 | - | - | 57  |
| Europe    | Caucasian         | 19463375 | 13.3 | -    | 2.5 | - | -   | - | -   | 20.8 | 60   | 120  | 16  | -  | 3 | - | - | - | 25  |
| Europe    | Caucasian         | 18521743 | -    | -    | -   | - | -   | - | -   | 23.1 | 1989 | 3978 | -   | -  | - | - | - | - | 919 |
| Europe    | Caucasian         | 20173083 | 15   | 0.1  | 0.1 | - | 0.1 | - | 0.1 | -    | 454  | 908  | 136 | 1  | 1 | - | - | 0 | -   |
| Europe    | Caucasian         | 12823155 | 14.2 | 0    | 0   | - | -   | - | -   | -    | 60   | 120  | 17  | 0  | 0 | - | - | - | -   |
| Europe    | Caucasian         | 15590749 | 16.9 | 0    | 0   | - | -   | - | -   | -    | 59   | 118  | 20  | 0  | 0 | - | - | - | -   |
| Europe    | Caucasian         | 20857895 | 14.0 | 0    | -   | - | -   | - | -   | -    | 203  | 406  | 57  | 0  | - | - | - | - | -   |

|        |                   |          |      |     |     |   |     |   |   |      |      |      |      |    |   |   |   |   |   |     |
|--------|-------------------|----------|------|-----|-----|---|-----|---|---|------|------|------|------|----|---|---|---|---|---|-----|
| Europe | Caucasian         | 21047200 | 17.9 | 0   | -   | - | -   | - | - | -    | 215  | 430  | 77   | 0  | - | - | - | - | - | -   |
| Europe | Caucasian         | 21108329 | 15.4 | 0.1 | -   | - | -   | - | - | -    | 344  | 688  | 106  | 1  | - | - | - | - | - | -   |
| Europe | Caucasian         | 20064729 | 15.7 | 0.5 | -   | - | -   | - | - | -    | 289  | 578  | 91   | 3  | - | - | - | - | - | -   |
| Europe | Caucasian         | 19337788 | 14.5 | 6.5 | -   | - | -   | - | - | -    | 186  | 372  | 54   | 24 | - | - | - | - | - | -   |
| Europe | Caucasian         | 18496131 | 16.5 | -   | -   | - | -   | - | - | -    | 124  | 248  | 41   | -  | - | - | - | - | - | -   |
| Europe | Caucasian         | 20179710 | 15.2 | -   | -   | - | -   | - | - | -    | 230  | 460  | 70   | -  | - | - | - | - | - | -   |
| Europe | Caucasian         | 18482659 | 16.4 | -   | -   | - | -   | - | - | -    | 797  | 1594 | 262  | -  | - | - | - | - | - | -   |
| Europe | Caucasian         | 11037802 | 14.0 | -   | -   | - | -   | - | - | -    | 952  | 1904 | 267  | -  | - | - | - | - | - | -   |
| Europe | Caucasian         | 18521743 | 14.5 | -   | -   | - | -   | - | - | -    | 1960 | 3920 | 570  | -  | - | - | - | - | - | -   |
| Europe | Caucasian         | 16815315 | 12.7 | 0.9 | -   | - | -   | - | - | -    | 273  | 546  | 69   | 5  | - | - | - | - | - | -   |
| Europe | Caucasian         | 19169185 | 14.2 | 0   | -   | - | -   | - | - | -    | 3774 | 7548 | 1072 | 0  | - | - | - | - | - | -   |
| Europe | Central European  | 19581389 | 8.5  | -   | -   | - | -   | - | - | 33.8 | 71   | 142  | 12   | -  | - | - | - | - | - | 48  |
| Europe | Croatian          | 12950145 | 15.0 | -   | -   | - | -   | - | - | -    | 200  | 400  | 60   | -  | - | - | - | - | - | -   |
| Europe | Danish            | 20665013 | 15.0 | -   | -   | - | -   | - | - | 20.1 | 276  | 552  | 83   | -  | - | - | - | - | - | 111 |
| Europe | Danish            | 16044105 | 13.8 | 0   | -   | - | -   | - | - | -    | 69   | 138  | 19   | 0  | - | - | - | - | - | -   |
| Europe | Danish            | 19192051 | 13.0 | 0   | -   | - | -   | - | - | -    | 300  | 600  | 78   | 0  | - | - | - | - | - | -   |
| Europe | Danish            | 9754988  | 16.5 | 0.0 | -   | - | -   | - | - | -    | 303  | 606  | 100  | 0  | - | - | - | - | - | -   |
| Europe | Danish            | 20684753 | 10.9 | -   | -   | - | -   | - | - | -    | 339  | 678  | 74   | -  | - | - | - | - | - | -   |
| Europe | Dutch             | 20531370 | 13.3 | -   | -   | - | -   | - | - | 22.1 | 678  | 1356 | 181  | -  | - | - | - | - | - | 299 |
| Europe | Dutch             | 19884907 | 15.4 | -   | -   | - | -   | - | - | 24.4 | 178  | 356  | 55   | -  | - | - | - | - | - | 87  |
| Europe | Dutch             | 19934793 | 16.8 | 0.2 | -   | - | -   | - | - | -    | 428  | 856  | 144  | 2  | - | - | - | - | - | -   |
| Europe | Dutch             | 11829201 | 12.9 | 0.2 | -   | - | -   | - | - | -    | 765  | 1530 | 198  | 3  | - | - | - | - | - | -   |
| Europe | Dutch             | 18854779 | 17.7 | -   | -   | - | -   | - | - | -    | 113  | 226  | 40   | -  | - | - | - | - | - | -   |
| Europe | Dutch             | 17667959 | 15   | -   | -   | - | -   | - | - | -    | 181  | 362  | 54   | -  | - | - | - | - | - | -   |
| Europe | English           | 12419832 | 13.4 | -   | -   | - | -   | - | - | -    | 1082 | 2164 | 291  | -  | - | - | - | - | - | -   |
| Europe | European          | 9435198  | 13   | 0.3 | 0.6 | - | -   | - | - | -    | 173  | 346  | 45   | 1  | 2 | - | - | - | - | -   |
| Europe | European-American | 9110363  | 13   | 0   | -   | - | -   | - | - | -    | 105  | 210  | 27   | 0  | - | - | - | - | - | -   |
| Europe | Faroese           | 20665013 | 18.6 | -   | -   | - | -   | - | - | 15.4 | 311  | 622  | 116  | -  | - | - | - | - | - | 96  |
| Europe | Faroese           | 16025294 | 18.8 | 0   | -   | - | -   | - | - | -    | 312  | 624  | 117  | 0  | - | - | - | - | - | -   |
| Europe | Finnish           | 16024198 | 16.4 | 0   | -   | - | -   | - | - | -    | 177  | 354  | 58   | 0  | - | - | - | - | - | -   |
| Europe | Finnish           | 17635176 | 17.6 | -   | -   | - | -   | - | - | -    | 449  | 898  | 158  | -  | - | - | - | - | - | -   |
| Europe | French            | 19496924 | -    | -   | 0.7 | 0 | 0.1 | - | - | 20.0 | 598  | 1196 | -    | -  | 8 | 0 | 1 | - | - | 239 |
| Europe | French            | 18205890 | 18.4 | -   | -   | - | -   | - | - | -    | 359  | 718  | 132  | -  | - | - | - | - | - | -   |
| Europe | French            | 20708365 | 17.6 | -   | -   | - | -   | - | - | -    | 411  | 822  | 145  | -  | - | - | - | - | - | -   |
| Europe | French            | 18394438 | 15.7 | -   | -   | - | -   | - | - | -    | 603  | 1206 | 189  | -  | - | - | - | - | - | -   |
| Europe | German            | 20492469 | 13.5 | -   | -   | - | -   | - | - | 21.3 | 986  | 1972 | 267  | -  | - | - | - | - | - | 421 |
| Europe | German            | 20083681 | -    | -   | -   | - | -   | - | - | 22.9 | 1524 | 3048 | -    | -  | - | - | - | - | - | 698 |
| Europe | German            | 18781853 | 15.1 | 0.0 | -   | - | -   | - | - | 25.7 | 423  | 846  | 128  | 0  | - | - | - | - | - | 217 |

|        |            |          |      |     |   |   |   |   |   |      |      |       |      |    |   |   |   |   |   |     |
|--------|------------|----------|------|-----|---|---|---|---|---|------|------|-------|------|----|---|---|---|---|---|-----|
| Europe | German     | 20826260 | 14.4 | -   | - | - | - | - | - | -    | 928  | 1856  | 268  | -  | - | - | - | - | - | 417 |
| Europe | German     | 16116487 | 15.8 | 0   | - | - | - | - | - | -    | 60   | 120   | 19   | 0  | - | - | - | - | - | -   |
| Europe | German     | 7663532  | 12.1 | 0   | - | - | - | - | - | -    | 174  | 348   | 42   | 0  | - | - | - | - | - | -   |
| Europe | German     | 17680025 | 11.9 | 3.8 | - | - | - | - | - | -    | 572  | 1144  | 136  | 44 | - | - | - | - | - | -   |
| Europe | German     | 14586385 | 15.6 | -   | - | - | - | - | - | -    | 96   | 192   | 30   | -  | - | - | - | - | - | -   |
| Europe | German     | 15371981 | 18.3 | -   | - | - | - | - | - | -    | 131  | 262   | 48   | -  | - | - | - | - | - | -   |
| Europe | German     | 19415824 | 15.0 | -   | - | - | - | - | - | -    | 533  | 1066  | 160  | -  | - | - | - | - | - | -   |
| Europe | German     | 12713578 | 15.0 | -   | - | - | - | - | - | -    | 562  | 1124  | 169  | -  | - | - | - | - | - | -   |
| Europe | German     | 20510210 | 16.3 | -   | - | - | - | - | - | -    | 760  | 1520  | 248  | -  | - | - | - | - | - | -   |
| Europe | German     | 19193675 | 14.6 | -   | - | - | - | - | - | -    | 2485 | 4970  | 727  | -  | - | - | - | - | - | -   |
| Europe | German     | 19424794 | 14.6 | -   | - | - | - | - | - | -    | 8609 | 17218 | 2510 | -  | - | - | - | - | - | -   |
| Europe | German     | 16413243 | 12.7 | -   | 1 | - | - | - | - | -    | 51   | 102   | 13   | -  | 1 | - | - | - | - | -   |
| Europe | Greek      | 19102714 | 13.1 | 0   | - | - | - | - | - | 19.6 | 283  | 566   | 74   | 0  | - | - | - | - | - | 111 |
| Europe | Italian    | 20309015 | 14.3 | -   | - | - | - | - | - | 17.6 | 182  | 364   | 52   | -  | - | - | - | - | - | 64  |
| Europe | Italian    | 15177309 | 11.1 | 0   | - | - | - | - | - | -    | 360  | 720   | 80   | 0  | - | - | - | - | - | -   |
| Europe | Italian    | 12496751 | 12.4 | -   | - | - | - | - | - | -    | 93   | 186   | 23   | -  | - | - | - | - | - | -   |
| Europe | Italian    | 19268736 | 17.7 | -   | - | - | - | - | - | -    | 772  | 1544  | 273  | -  | - | - | - | - | - | -   |
| Europe | Italian    | 18004210 | 17.1 | -   | - | - | - | - | - | -    | 1419 | 2838  | 485  | -  | - | - | - | - | - | -   |
| Europe | Norwegian  | 20565970 | 17.8 | -   | - | - | - | - | - | 21.7 | 90   | 180   | 32   | -  | - | - | - | - | - | 39  |
| Europe | Norwegian  | 20665013 | 15.2 | -   | - | - | - | - | - | 22.0 | 309  | 618   | 94   | -  | - | - | - | - | - | 136 |
| Europe | Norwegian  | 18677622 | -    | -   | - | - | - | - | - | 23.6 | 121  | 242   | -    | -  | - | - | - | - | - | 57  |
| Europe | Norwegian  | 17625515 | 18.1 | 0.6 | - | - | - | - | - | -    | 166  | 332   | 60   | 2  | - | - | - | - | - | 73  |
| Europe | Norwegian  | 12835613 | 15.2 | 0   | 0 | - | - | - | - | -    | 128  | 256   | 39   | 0  | 0 | - | - | - | - | -   |
| Europe | Norwegian  | 16418702 | 19.9 | -   | - | - | - | - | - | -    | 83   | 166   | 33   | -  | - | - | - | - | - | -   |
| Europe | Polish     | 16912869 | 11.6 | -   | - | - | - | - | - | 27.2 | 125  | 250   | 29   | -  | - | - | - | - | - | 68  |
| Europe | Polish     | 20376628 | 12.6 | -   | - | - | - | - | - | 28.1 | 139  | 278   | 35   | -  | - | - | - | - | - | 78  |
| Europe | Polish     | 15976989 | 10.0 | -   | - | - | - | - | - | -    | 70   | 140   | 14   | -  | - | - | - | - | - | -   |
| Europe | Polish     | 18577829 | 10.5 | -   | - | - | - | - | - | -    | 105  | 210   | 22   | -  | - | - | - | - | - | -   |
| Europe | Polish     | 20924183 | 11.9 | -   | - | - | - | - | - | -    | 261  | 522   | 62   | -  | - | - | - | - | - | -   |
| Europe | Portuguese | 9295062  | 13.1 | 0   | - | - | - | - | - | -    | 153  | 306   | 40   | 0  | - | - | - | - | - | -   |
| Europe | Portuguese | 18240903 | 14   | -   | - | - | - | - | - | -    | 126  | 252   | 35   | -  | - | - | - | - | - | -   |
| Europe | Russian    | 12879168 | 11.4 | 0.3 | - | - | - | - | - | -    | 290  | 580   | 66   | 2  | - | - | - | - | - | -   |
| Europe | Russian    | 18061941 | 9.4  | -   | - | - | - | - | - | -    | 159  | 318   | 30   | -  | - | - | - | - | - | -   |
| Europe | Russian    | 20373852 | 13.1 | -   | - | - | - | - | - | -    | 352  | 704   | 92   | -  | - | - | - | - | - | -   |
| Europe | Siberian   | 18597650 | -    | 3.5 | - | - | - | - | - | -    | 437  | 874   | -    | 31 | - | - | - | - | - | -   |
| Europe | Siberian   | 18597650 | 17.3 | -   | - | - | - | - | - | -    | 433  | 866   | 150  | -  | - | - | - | - | - | -   |
| Europe | Slovenian  | 18496682 | 10.5 | -   | - | - | - | - | - | 32.9 | 105  | 210   | 22   | -  | - | - | - | - | - | 69  |
| Europe | Spanish    | 15728438 | 13.7 | -   | - | - | - | - | - | -    | 300  | 600   | 82   | -  | - | - | - | - | - | -   |

|             |                    |          |      |     |     |     |     |   |     |      |       |       |      |    |    |   |   |   |     |   |
|-------------|--------------------|----------|------|-----|-----|-----|-----|---|-----|------|-------|-------|------|----|----|---|---|---|-----|---|
| Europe      | Spanish            | 16006997 | 13.9 | -   | -   | -   | -   | - | -   | -    | 672   | 1344  | 187  | -  | -  | - | - | - | -   | - |
| Europe      | Swedish            | 20499227 | 28   | 11  | -   | -   | -   | - | -   | 0.3  | 185   | 370   | 104  | 41 | -  | - | - | - | -   | 1 |
| Europe      | Swedish            | 16413245 | -    | -   | -   | -   | -   | - | -   | 6.4  | 314   | 628   | -    | -  | -  | - | - | - | 40  |   |
| Europe      | Swedish            | 19907421 | 14.5 | -   | 0.1 | -   | -   | - | -   | 17.7 | 713   | 1426  | 207  | -  | 1  | - | - | - | 252 |   |
| Europe      | Swedish            | 20468063 | 15.1 | -   | -   | -   | -   | - | -   | 19.0 | 1416  | 2832  | 427  | -  | -  | - | - | - | 537 |   |
| Europe      | Swedish            | 8747407  | 11.7 | 0.3 | -   | -   | -   | - | -   | -    | 175   | 350   | 41   | 1  | -  | - | - | - | -   |   |
| Europe      | Swedish            | 9776439  | 14.5 | 0.4 | -   | -   | -   | - | -   | -    | 245   | 490   | 71   | 2  | -  | - | - | - | -   |   |
| Europe      | Swedish            | 9772024  | 15.5 | 0   | -   | -   | -   | - | -   | -    | 110   | 220   | 34   | 4  | -  | - | - | - | -   |   |
| Europe      | Swedish            | 9829356  | 12.6 | 1.4 | -   | -   | -   | - | -   | -    | 143   | 286   | 36   | 4  | -  | - | - | - | -   |   |
| Europe      | Swiss              | 16338275 | 16.3 | 0.2 | -   | -   | -   | - | -   | -    | 208   | 416   | 68   | 1  | -  | - | - | - | -   |   |
| Europe      | Swiss              | 17697139 | 13.8 | -   | -   | -   | -   | - | -   | -    | 94    | 188   | 26   | -  | -  | - | - | - | -   |   |
| Europe      | Swiss              | 17681590 | 17.9 | -   | -   | -   | -   | - | -   | -    | 81    | 162   | 29   | -  | -  | - | - | - | -   |   |
| Europe      | Swiss              | 11809184 | 13.4 | -   | -   | -   | -   | - | -   | -    | 123   | 246   | 33   | -  | -  | - | - | - | -   |   |
| Europe      | Swiss              | 17178267 | 16.7 | 0.1 | -   | -   | -   | - | -   | -    | 245   | 490   | 82   | 0  | -  | - | - | - | -   |   |
| Europe      | Turkish            | 10460072 | 12   | 0.4 | 0   | 0   | -   | - | -   | -    | 404   | 808   | 97   | 3  | 0  | 0 | - | - | -   |   |
| Europe      | Turkish            | 19499406 | 12.0 | 0   | -   | -   | -   | - | -   | -    | 100   | 200   | 24   | 0  | -  | - | - | - | -   |   |
| Europe      | Turkish            | 17269966 | 11.5 | 0   | -   | -   | -   | - | -   | -    | 169   | 338   | 39   | 0  | -  | - | - | - | -   |   |
| Europe      | Turkish            | 17290075 | 21.7 | 0   | -   | -   | -   | - | -   | -    | 182   | 364   | 79   | 0  | -  | - | - | - | -   |   |
| Europe      | Turkish            | 20533108 | 11.4 | 5.2 | -   | -   | -   | - | -   | -    | 105   | 210   | 24   | 11 | -  | - | - | - | -   |   |
| Europe      | Turkish            | 17868191 | 12.1 | 4.0 | -   | -   | -   | - | -   | -    | 199   | 398   | 48   | 16 | -  | - | - | - | -   |   |
| Europe      | Turkish            | 11908757 | 9.4  | 8.9 | -   | -   | -   | - | -   | -    | 96    | 192   | 18   | 17 | -  | - | - | - | -   |   |
| Europe      | Turkish            | 19821196 | 13   | 1   | -   | -   | -   | - | -   | -    | 100   | 200   | 26   | 2  | -  | - | - | - | -   |   |
| Europe      | White              | 19106084 | -    | -   | -   | -   | -   | - | -   | 19.5 | 2164  | 4328  | -    | -  | -  | - | - | - | 844 |   |
| Europe      | White              | 20801498 | 14.1 | 0.1 | 0.1 | 0.0 | 0.0 | 0 | 0.4 | 22.3 | 10285 | 20570 | 2899 | 16 | 26 | 1 | 2 | 0 | 74  |   |
| Europe      | White              | 19106083 | -    | -   | -   | 0.0 | -   | - | -   | -    | 2176  | 4352  | -    | -  | -  | 1 | - | - | -   |   |
| Europe      | White              | 19106083 | -    | -   | 0.5 | -   | -   | - | -   | -    | 2189  | 4378  | -    | -  | 21 | - | - | - | -   |   |
| Europe      | White              | 19106083 | -    | 0.0 | -   | -   | -   | - | -   | -    | 2187  | 4374  | -    | 1  | -  | - | - | - | -   |   |
| Europe      | White              | 19106083 | 15.4 | -   | -   | -   | -   | - | -   | -    | 2178  | 4356  | 670  | -  | -  | - | - | - | -   |   |
| Europe      | White/Non-Hispanic | 21192344 | 13.3 | 0   | 0.4 | -   | 0.0 | - | 0.4 | 22.5 | 1253  | 2506  | 333  | 0  | 10 | - | 1 | - | 10  |   |
| Middle East | Bedouin            | 15651900 | 12.0 | 1.0 | -   | -   | -   | - | -   | -    | 50    | 100   | 12   | 1  | -  | - | - | - | -   |   |
| Middle East | Iranian            | 17201743 | 14.0 | 0.0 | -   | -   | -   | - | -   | -    | 200   | 400   | 56   | 0  | -  | - | - | - | -   |   |
| Middle East | Iranian            | 20804307 | 13.4 | 1.8 | -   | -   | -   | - | -   | -    | 82    | 164   | 22   | 3  | -  | - | - | - | -   |   |
| Middle East | Iranian            | 20637959 | 11.1 | 1.0 | -   | -   | -   | - | -   | -    | 99    | 198   | 22   | 2  | -  | - | - | - | -   |   |
| Middle East | Iranian            | 20885015 | 12.3 | 0.7 | -   | -   | -   | - | -   | -    | 150   | 300   | 37   | 2  | -  | - | - | - | -   |   |
| Middle East | Jewish Israeli     | 10096259 | 15.4 | 0.7 | -   | -   | -   | - | -   | -    | 140   | 280   | 43   | 2  | -  | - | - | - | -   |   |
| Middle East | Palestinian        | 19193970 | 7.1  | 2.6 | -   | -   | -   | - | -   | -    | 252   | 504   | 36   | 13 | -  | - | - | - | -   |   |
| Middle East | Saudi Arabians     | 9110363  | 15.0 | 0.0 | -   | -   | -   | - | -   | -    | 97    | 194   | 29   | 0  | -  | - | - | - | -   |   |

|                           |                              |          |             |             |   |   |   |   |   |   |      |       |            |            |          |          |          |   |   |   |
|---------------------------|------------------------------|----------|-------------|-------------|---|---|---|---|---|---|------|-------|------------|------------|----------|----------|----------|---|---|---|
| <b>Oceania</b>            | Filipinos                    | 9110363  | <b>39</b>   | <b>7.7</b>  | - | - | - | - | - | - | 52   | 104   | 41         | 8          | -        | -        | -        | - | - | - |
| <b>Oceania</b>            | Maori                        | 18425152 | <b>24</b>   | <b>1.7</b>  | - | - | - | - | - | - | 60   | 120   | 29         | 2          | -        | -        | -        | - | - | - |
| <b>Oceania</b>            | Sepik (pooled study)         | 14583683 | <b>45</b>   | <b>16</b>   | - | - | - | - | - | - | 401  | 802   | 361        | 127        | -        | -        | -        | - | - | - |
| <b>Oceania</b>            | Vanuatuan (pooled study)     | 10591538 | <b>63</b>   | <b>15</b>   | - | - | - | - | - | - | 5638 | 11276 | 7132       | 1660       | -        | -        | -        | - | - | - |
| <b>Oceania</b>            | Vanuatuan (pooled study)     | 9093256  | 70.8        | 13.3        | - | - | - | - | - | - | 493  | 986   | <b>698</b> | <b>131</b> | -        | -        | -        | - | - | - |
| <b>Oceania</b>            | Western Australian Aborigine | 11207032 | <b>35.5</b> | <b>14.3</b> | - | - | - | - | - | - | 227  | 454   | 161        | 65         | -        | -        | -        | - | - | - |
|                           |                              |          |             |             |   |   |   |   |   |   |      |       |            |            |          |          |          |   |   |   |
| <b>South/Central Asia</b> | Maharashtrian (India)        | 17978853 | 46.0        | 1.1         | - | - | - | - | - | - | 139  | 278   | <b>128</b> | <b>3</b>   | -        | -        | -        | - | - | - |
| <b>South/Central Asia</b> | North Indian                 | 11014415 | 29.8        | 0           | - | - | - | - | - | - | 121  | 242   | <b>72</b>  | <b>0</b>   | -        | -        | -        | - | - | - |
| <b>South/Central Asia</b> | North Indian                 | 20602612 | 36.3        | 0.4         | - | - | - | - | - | - | 457  | 914   | <b>332</b> | <b>4</b>   | -        | -        | -        | - | - | - |
| <b>South/Central Asia</b> | North Indian                 | 18644391 | 34.1        | 5.8         | - | - | - | - | - | - | 600  | 1200  | <b>409</b> | <b>70</b>  | -        | -        | -        | - | - | - |
| <b>South/Central Asia</b> | North Indian                 | 19954746 | 34.9        | -           | - | - | - | - | - | - | 750  | 1500  | <b>523</b> | -          | -        | -        | -        | - | - | - |
| <b>South/Central Asia</b> | North Indian                 | 19942749 | 29.1        | -           | - | - | - | - | - | - | 91   | 182   | <b>53</b>  | -          | -        | -        | -        | - | - | - |
| <b>South/Central Asia</b> | Pakistani                    | 20102361 | 27.2        | -           | - | - | - | - | - | - | 68   | 136   | <b>37</b>  | -          | -        | -        | -        | - | - | - |
| <b>South/Central Asia</b> | South Indian                 | 15662508 | 36.7        | 0.5         | 0 | 0 | 0 | - | - | - | 300  | 600   | <b>220</b> | <b>3</b>   | <b>0</b> | <b>0</b> | <b>0</b> | - | - | - |
| <b>South/Central Asia</b> | South Indian                 | 15660966 | 34.2        | 0.6         | - | - | - | - | - | - | 341  | 682   | <b>233</b> | <b>4</b>   | -        | -        | -        | - | - | - |
| <b>South/Central Asia</b> | South Indian                 | 20045989 | <b>38</b>   | <b>2</b>    | - | - | - | - | - | - | 50   | 100   | 38         | 2          | -        | -        | -        | - | - | - |
| <b>South/Central Asia</b> | South Indian                 | 19430176 | <b>37.1</b> | <b>2.5</b>  | - | - | - | - | - | - | 58   | 116   | 43         | 3          | -        | -        | -        | - | - | - |
| <b>South/Central Asia</b> | Tamilian                     | 20390258 | 42.0        | 0.7         | - | - | - | - | - | - | 292  | 584   | <b>245</b> | <b>4</b>   | -        | -        | -        | - | - | - |
| <b>South/Central Asia</b> | Tamilian                     | 12919183 | <b>37.9</b> | <b>2.2</b>  | - | - | - | - | - | - | 112  | 224   | 85         | 5          | -        | -        | -        | - | - | - |
| <b>South/Central Asia</b> | Uighur Chinese               | 20460345 | -           | 2.4         | - | - | - | - | - | - | 706  | 1412  | -          | <b>34</b>  | -        | -        | -        | - | - | - |
| <b>South/Central Asia</b> | Uigur Chinese                | 15612662 | 49.0        | 1.6         | - | - | - | - | - | - | 96   | 192   | <b>94</b>  | <b>3</b>   | -        | -        | -        | - | - | - |
| <b>South/Central Asia</b> | Uyur Chinese                 | 19444287 | 16.1        | 9.4         | - | - | - | - | - | - | 149  | 298   | <b>48</b>  | <b>28</b>  | -        | -        | -        | - | - | - |

<sup>1</sup> Worldwide subpopulations and ethnicities were grouped based on the Human Genome Diversity Project-Centre Etude Polymorphism Humain (HGDP-CEPH) (21, 22).

<sup>2</sup> PMID is a unique PubMed Identifier number assigned to each PubMed citation of life sciences and biomedical scientific journal articles: <http://www.ncbi.nlm.nih.gov/pubmed/>.

<sup>3</sup> Data in bold were manually retrieved from each study; non-bold data were calculated and derived from the applicable reported (bold) data. Alleles not interrogated in a given study are noted by a dashed line ('-').

<sup>4</sup> Because the *CYP2C19\*17* allele was identified in 2006 (103), *CYP2C19* studies prior to this date did not include this allele.

**Supplemental Table S5. Predicted metabolizer phenotypes based on *CYP2C19* genotype and predicted average frequencies**

|               | <b>Predicted Metabolizer Phenotype (Average Multi-Ethnic Frequency<sup>1</sup>)</b> |                |               |             |             |             |             |             |                           |
|---------------|-------------------------------------------------------------------------------------|----------------|---------------|-------------|-------------|-------------|-------------|-------------|---------------------------|
| <b>Allele</b> | <b>*1</b>                                                                           | <b>*2</b>      | <b>*3</b>     | <b>*4</b>   | <b>*5</b>   | <b>*6</b>   | <b>*7</b>   | <b>*8</b>   | <b>*17</b>                |
| <b>*1</b>     | EM<br>(35-50%)                                                                      | IM<br>(17-35%) | IM<br>(1-11%) | IM<br>(<1%) | IM<br>(<1%) | IM<br>(<1%) | IM<br>(<1%) | IM<br>(<1%) | UM<br>(3-27%)             |
| <b>*2</b>     |                                                                                     | PM<br>(2-8%)   | PM<br>(0-5%)  | PM<br>(<1%) | PM<br>(<1%) | PM<br>(<1%) | PM<br>(<1%) | PM<br>(<1%) | IM <sup>2</sup><br>(1-6%) |
| <b>*3</b>     |                                                                                     |                | PM<br>(<1%)   | PM<br>(<1%) | PM<br>(<1%) | PM<br>(<1%) | PM<br>(<1%) | PM<br>(<1%) | IM <sup>2</sup><br>(<1%)  |
| <b>*4</b>     |                                                                                     |                |               | PM<br>(<1%) | PM<br>(<1%) | PM<br>(<1%) | PM<br>(<1%) | PM<br>(<1%) | IM <sup>2</sup><br>(<1%)  |
| <b>*5</b>     |                                                                                     |                |               |             | PM<br>(<1%) | PM<br>(<1%) | PM<br>(<1%) | PM<br>(<1%) | IM <sup>2</sup><br>(<1%)  |
| <b>*6</b>     |                                                                                     |                |               |             |             | PM<br>(<1%) | PM<br>(<1%) | PM<br>(<1%) | IM <sup>2</sup><br>(<1%)  |
| <b>*7</b>     |                                                                                     |                |               |             |             |             | PM<br>(<1%) | PM<br>(<1%) | IM <sup>2</sup><br>(<1%)  |
| <b>*8</b>     |                                                                                     |                |               |             |             |             |             | PM<br>(<1%) | IM <sup>2</sup><br>(<1%)  |
| <b>*17</b>    |                                                                                     |                |               |             |             |             |             |             | UM<br>(1-5%)              |

EM: extensive metabolizer; IM: intermediate metabolizer; PM: poor metabolizer; UM: ultrarapid metabolizer.

<sup>1</sup> Frequencies of predicted metabolizer phenotypes were determined using the allele frequencies from **Supplemental Tables S3 and S4** and the Hardy-Weinberg equation.

<sup>2</sup> The predicted metabolizer phenotype for these genotypes are provisional classifications. The currently available evidence indicates that the \*17 gain-of-function allele is unable to completely compensate for the \*2 loss-of-function allele (106); however, this data has not been consistently replicated and is therefore a provisional classification.

**Supplemental Table S6. Evidence linking *CYP2C19* genotype with clopidogrel response.**

| Type of Experimental Model | Major Findings                                                                                                                                     | References                                                                                                                                                                                                                | Level of Evidence* |
|----------------------------|----------------------------------------------------------------------------------------------------------------------------------------------------|---------------------------------------------------------------------------------------------------------------------------------------------------------------------------------------------------------------------------|--------------------|
| In vitro                   | <i>CYP2C19</i> *2 (c.681G>A; rs4244285) is a common polymorphism that results in a splicing defect and non-functional <i>CYP2C19</i> protein.      | de Morais, <i>et al.</i> 1994 (96)                                                                                                                                                                                        | High               |
| In vitro                   | The <i>CYP2C19</i> *3 - *8 variant alleles result in loss-of-function.                                                                             | de Morais, <i>et al.</i> 1994 (97),<br>Xiao, <i>et al.</i> 1997 (98),<br>Ferguson, <i>et al.</i> 1998 (99),<br>Ibeanu, <i>et al.</i> 1998 (100),<br>Ibeanu, <i>et al.</i> 1998 (101),<br>Ibeanu, <i>et al.</i> 1999 (102) | High               |
| In vitro/In vivo           | <i>CYP2C19</i> *17 (c.-806C>T; rs12248560) is a common polymorphism that results in increased activity as a consequence of enhanced transcription. | Sim, <i>et al.</i> 2006 (103),<br>Rudberg, <i>et al.</i> 2008 (104),<br>Li-Wan-Po, <i>et al.</i> 2010 (105)                                                                                                               | High               |
| In vitro                   | CYP1A2, CYP2B6, CYP2C9, CYP2C19 and CYP3A4/5 are involved in the hepatic metabolism of clopidogrel.                                                | Savi, <i>et al.</i> 1992 (107),<br>Savi, <i>et al.</i> 2000 (108),<br>Clarke, <i>et al.</i> 2003 (109),<br>Farid, <i>et al.</i> 2007 (110),<br>Kazui, <i>et al.</i> 2010 (111),<br>Abell and Liu, 2011 (112)              | High               |
| In vitro                   | CYP2C19 contributes substantially to both oxidative steps of clopidogrel metabolism during the formation of its active metabolite.                 | Kazui, <i>et al.</i> 2010 (111)                                                                                                                                                                                           | High               |
| Clinical                   | <i>CYP2C19</i> *2 is associated with reduced formation of active metabolites (pharmacokinetics) in healthy subjects treated with clopidogrel.      | Brandt, <i>et al.</i> 2007 (32),<br>Kim, <i>et al.</i> 2008 (82),<br>Umemura, <i>et al.</i> 2008 (83),<br>Mega, <i>et al.</i> 2009 (2),<br>Simon, <i>et al.</i> 2011 (57),<br>Gong, <i>et al.</i> 2012 (52),              | High               |

|          |                                                                                                                                              |                                                                                                                                                                                                                                                                                                                                                                                                                                                                                                                                                                                                                                                                                                                                                             |      |
|----------|----------------------------------------------------------------------------------------------------------------------------------------------|-------------------------------------------------------------------------------------------------------------------------------------------------------------------------------------------------------------------------------------------------------------------------------------------------------------------------------------------------------------------------------------------------------------------------------------------------------------------------------------------------------------------------------------------------------------------------------------------------------------------------------------------------------------------------------------------------------------------------------------------------------------|------|
|          |                                                                                                                                              | Kelly, <i>et al.</i> 2012 (113)                                                                                                                                                                                                                                                                                                                                                                                                                                                                                                                                                                                                                                                                                                                             |      |
| Clinical | <i>CYP2C19*2</i> is associated with reduced formation of active metabolites (pharmacokinetics) in ACS/PCI patients treated with clopidogrel. | Varenhorst, <i>et al.</i> 2009 (84),<br>Collet, <i>et al.</i> 2011 (114)                                                                                                                                                                                                                                                                                                                                                                                                                                                                                                                                                                                                                                                                                    | High |
| Clinical | <i>CYP2C19*2</i> is associated with higher on-treatment platelet reactivity (pharmacodynamics) in healthy subjects treated with clopidogrel. | Hulot, <i>et al.</i> 2006 (1),<br>Brandt, <i>et al.</i> 2007 (32),<br>Fontana, <i>et al.</i> 2007 (115),<br>Chen, <i>et al.</i> 2008 (116),<br>Kim, <i>et al.</i> 2008 (82),<br>Umemura, <i>et al.</i> 2008 (83),<br>Mega, <i>et al.</i> 2009 (2),<br>Shuldiner, <i>et al.</i> 2009 (3),<br>Simon, <i>et al.</i> 2011 (57)                                                                                                                                                                                                                                                                                                                                                                                                                                  | High |
| Clinical | <i>CYP2C19*2</i> is associated with higher on-treatment platelet reactivity (pharmacodynamics) in ACS/PCI patients treated with clopidogrel. | Giusti, <i>et al.</i> 2007 (73),<br>Frere, <i>et al.</i> 2008 (33),<br>Geisler, <i>et al.</i> 2008 (31),<br>Trenk, <i>et al.</i> 2008 (30),<br>Jinnai, <i>et al.</i> 2009 (117),<br>Shuldiner, <i>et al.</i> 2009 (3),<br>Varenhorst, <i>et al.</i> 2009 (84),<br>Harmsze, <i>et al.</i> 2010 (41),<br>Hochholzer, <i>et al.</i> 2010 (118),<br>Jeong, <i>et al.</i> 2010 (119),<br>Kang, <i>et al.</i> 2010 (120),<br>Sibbing, <i>et al.</i> 2010 (106),<br>Bouman, <i>et al.</i> 2011 (121),<br>Collet, <i>et al.</i> 2011 (114),<br>Cuisset, <i>et al.</i> 2011 (122),<br>Gurbel, <i>et al.</i> 2011 (36),<br>Hwang, <i>et al.</i> 2011 (123),<br>Jeong, <i>et al.</i> 2011 (124),<br>Maeda, <i>et al.</i> 2011 (125),<br>Ono, <i>et al.</i> 2011 (126), | High |



|          |                                                                                                                                                                                                  |                                                                                                                                                                                                                                                                                                                                                                                                                                                                                                                                                                                                                                                                                                         |      |
|----------|--------------------------------------------------------------------------------------------------------------------------------------------------------------------------------------------------|---------------------------------------------------------------------------------------------------------------------------------------------------------------------------------------------------------------------------------------------------------------------------------------------------------------------------------------------------------------------------------------------------------------------------------------------------------------------------------------------------------------------------------------------------------------------------------------------------------------------------------------------------------------------------------------------------------|------|
|          |                                                                                                                                                                                                  | Park, <i>et al.</i> 2011 (127),<br>Rideg, <i>et al.</i> 2011 (128),<br>Yamamoto, <i>et al.</i> 2011 (129),<br>Bonello, <i>et al.</i> 2012 (130),<br>Harmsze, <i>et al.</i> 2012 (131),<br>Kassimis, <i>et al.</i> 2012 (132),<br>Kim, <i>et al.</i> 2012 (133),<br>Kreutz, <i>et al.</i> 2012 (78),<br>Oh, <i>et al.</i> 2012 (134),<br>Price, <i>et al.</i> 2012 (56),<br>Tang, <i>et al.</i> 2012 (135),<br>Wu, <i>et al.</i> 2012 (136),<br>Zou, <i>et al.</i> 2012 (137)                                                                                                                                                                                                                            |      |
| Clinical | <i>CYP2C19</i> *2 is associated with adverse cardiovascular outcomes (e.g., cardiovascular death, myocardial infarction, stroke, stent thrombosis) in ACS/PCI patients treated with clopidogrel. | Trenk, <i>et al.</i> 2008 (30),<br>Collet, <i>et al.</i> 2009 (28),<br>Giusti, <i>et al.</i> 2009 (138),<br>Mega, <i>et al.</i> 2009 (2),<br>Shuldiner, <i>et al.</i> 2009 (3),<br>Sibbing, <i>et al.</i> 2009 (4),<br>Simon, <i>et al.</i> 2009 (5),<br>Harmsze, <i>et al.</i> 2010 (139),<br>Malek, <i>et al.</i> 2010 (140),<br>Cayla, <i>et al.</i> 2011 (10),<br>Jeong, <i>et al.</i> 2011 (124),<br>Marcucci, <i>et al.</i> 2011 (141),<br>Rideg, <i>et al.</i> 2011 (128),<br>Yamamoto, <i>et al.</i> 2011 (129),<br>Delaney, <i>et al.</i> 2012 (80),<br>Oh, <i>et al.</i> 2012 (134),<br>Teixeira, <i>et al.</i> 2012 (142),<br>Wu, <i>et al.</i> 2012 (136),<br>Zou, <i>et al.</i> 2012 (137) | High |
| Clinical | <i>CYP2C19</i> *3 (and possibly other loss-of-function alleles) is                                                                                                                               | Kim, <i>et al.</i> 2008 (82),                                                                                                                                                                                                                                                                                                                                                                                                                                                                                                                                                                                                                                                                           | High |

|          |                                                                                                                                                                                                                                               |                                                                                                                                                                                                                                                                                                                                                                                                                                                                                                           |          |
|----------|-----------------------------------------------------------------------------------------------------------------------------------------------------------------------------------------------------------------------------------------------|-----------------------------------------------------------------------------------------------------------------------------------------------------------------------------------------------------------------------------------------------------------------------------------------------------------------------------------------------------------------------------------------------------------------------------------------------------------------------------------------------------------|----------|
|          | associated with lower formation of active metabolites (pharmacokinetics) in healthy subjects treated with clopidogrel.                                                                                                                        | Umemura, <i>et al.</i> 2008 (83),<br>Mega, <i>et al.</i> 2009 (2),<br>Kelly, <i>et al.</i> 2012 (113)                                                                                                                                                                                                                                                                                                                                                                                                     |          |
| Clinical | <i>CYP2C19*3</i> (and possibly other loss-of-function alleles) is associated with higher on-treatment platelet reactivity (pharmacodynamics) in healthy subjects treated with clopidogrel.                                                    | Chen, <i>et al.</i> 2008 (116),<br>Kim, <i>et al.</i> 2008 (82),<br>Umemura, <i>et al.</i> 2008 (83),<br>Mega, <i>et al.</i> 2009 (2)                                                                                                                                                                                                                                                                                                                                                                     | High     |
| Clinical | <i>CYP2C19*3</i> (and possibly other loss-of-function alleles) is associated with higher on-treatment platelet reactivity (pharmacodynamics) in ACS/PCI patients treated with clopidogrel.                                                    | Jinnai, <i>et al.</i> 2009 (117),<br>Lee, <i>et al.</i> 2009 (143),<br>Jeong, <i>et al.</i> 2010 (119),<br>Kang, <i>et al.</i> 2010 (120),<br>Hwang, <i>et al.</i> 2011 (123),<br>Jeong, <i>et al.</i> 2011 (124),<br>Maeda, <i>et al.</i> 2011 (125),<br>Ono, <i>et al.</i> 2011 (126),<br>Park, <i>et al.</i> 2011 (127),<br>Yamamoto, <i>et al.</i> 2011 (129),<br>Kim, <i>et al.</i> 2012 (133),<br>Tang, <i>et al.</i> 2012 (135),<br>Wu, <i>et al.</i> 2012 (136),<br>Zou, <i>et al.</i> 2012 (137) | High     |
| Clinical | <i>CYP2C19*3</i> (and possibly other loss-of-function alleles) is associated with adverse cardiovascular outcomes (e.g., cardiovascular death, myocardial infarction, stroke, stent thrombosis) in ACS/PCI patients treated with clopidogrel. | Collet, <i>et al.</i> 2009 (28),<br>Mega, <i>et al.</i> 2009 (2),<br>Simon, <i>et al.</i> 2009 (5),<br>Harmsze, <i>et al.</i> 2010 (139),<br>Jeong, <i>et al.</i> 2011 (124),<br>Yamamoto, <i>et al.</i> 2011 (129),<br>Wu, <i>et al.</i> 2012 (136),<br>Zou, <i>et al.</i> 2012 (137)                                                                                                                                                                                                                    | High     |
| Clinical | <i>CYP2C19*17</i> is associated with lower on-treatment platelet reactivity (pharmacodynamics) in ACS/PCI patients treated with clopidogrel.                                                                                                  | Frere, <i>et al.</i> 2009 (144),<br>Sibbing, <i>et al.</i> 2010 (29),<br>Sibbing, <i>et al.</i> 2010 (106),<br>Harmsze, <i>et al.</i> 2012 (131),                                                                                                                                                                                                                                                                                                                                                         | Moderate |

|          |                                                                                                                                                                                                                                                             |                                                                                                                                                                                 |          |
|----------|-------------------------------------------------------------------------------------------------------------------------------------------------------------------------------------------------------------------------------------------------------------|---------------------------------------------------------------------------------------------------------------------------------------------------------------------------------|----------|
|          |                                                                                                                                                                                                                                                             | Li, <i>et al.</i> 2012 (35),<br>Sorich, <i>et al.</i> 2012 (37),<br>Subraja, <i>et al.</i> 2012 (145)                                                                           |          |
| Clinical | <i>CYP2C19*17</i> is associated with enhanced clopidogrel response and an increased bleeding risk in ACS/PCI patients treated with clopidogrel.                                                                                                             | Sibbing, <i>et al.</i> 2010 (29),<br>Tiroch, <i>et al.</i> 2010 (146),<br>Harmsze, <i>et al.</i> 2012 (131),<br>Li, <i>et al.</i> 2012 (35),<br>Sorich, <i>et al.</i> 2012 (37) | Moderate |
| Clinical | <i>CYP2C19</i> loss-of-function alleles are not associated with adverse cardiovascular outcomes in coronary patients with low frequencies of PCI and with other indications (e.g., atrial fibrillation) treated with clopidogrel.                           | Pare, <i>et al.</i> 2010 (88),<br>Wallentin, <i>et al.</i> 2010 (9)                                                                                                             | High     |
| Clinical | ACS/PCI patients with <i>CYP2C19</i> reduced metabolizer genotypes have reduced risks of primary outcome with prasugrel compared to clopidogrel. However, for <i>CYP2C19</i> EMs, the risks with prasugrel and clopidogrel are not significantly different. | Sorich, <i>et al.</i> 2010 (147)                                                                                                                                                | High     |
| Clinical | ACS/PCI patients with <i>CYP2C19</i> reduced metabolizer genotypes have reduced risks of primary outcome with ticagrelor compared to clopidogrel, which was less significant among <i>CYP2C19</i> EMs and most pronounced among patients undergoing PCI.    | Wallentin, <i>et al.</i> 2010 (9),<br>Hulot, <i>et al.</i> 2011 (90)                                                                                                            | High     |

ACS: acute coronary syndrome; EM: extensive metabolizer; PCI: percutaneous coronary intervention

\* See above for description of ‘**Levels of Evidence Linking Genotype to Phenotype**’.

**Supplemental Table S7. Evidence linking *CYP2C19* genotype with clopidogrel response (META-ANALYSES)**

| Study Design                                                                                                         | Study Inclusion Date | Significant <i>CYP2C19</i> Genotype Risk                                                                                                                                                                                                                                              | References                        |
|----------------------------------------------------------------------------------------------------------------------|----------------------|---------------------------------------------------------------------------------------------------------------------------------------------------------------------------------------------------------------------------------------------------------------------------------------|-----------------------------------|
| Meta-analysis of <i>CYP2C19</i> *2 and PPI:<br>- 10 studies<br>- 11,959 total patients<br>- established CAD          | October 2009         | <b>MACE:</b><br>*2 carrier: OR: 1.29 (1.12-1.49)<br><b>ST:</b><br>*2 carrier: OR: 3.45 (2.14-5.57)<br>Heterozygotes: OR: 3.34 (1.84-5.93)<br>Homozygotes: OR: 4.68 (1.55-14.11)                                                                                                       | Hulot, <i>et al.</i> 2010 (6)     |
| Meta-analysis of <i>CYP2C19</i> *2:<br>- 8 studies<br>- 8,280 total patients<br>- established CAD undergoing PCI     | December 2009        | <b>MACE:</b><br>*2 carrier: OR: 1.46 (1.01-2.13)<br><b>Cardiac mortality:</b><br>*2 carrier: OR: 2.07 (1.22–3.52)<br><b>MI:</b><br>*2 carrier: OR: 1.69 (1.09-2.61)<br><b>ST:</b><br>*2 carrier: OR: 3.81 (2.27-6.40)<br><b>Ischemic stroke:</b><br>*2 carrier: OR: 5.78 (1.62-20.65) | Jin, <i>et al.</i> 2011 (148)     |
| Meta-analysis of <i>CYP2C19</i> *2:<br>- 7 studies<br>- 8,043 total patients<br>- established CAD                    | January 2010         | <b>MACE:</b><br>*2 carrier: RR: 1.96 (1.14-3.37)<br><b>ST:</b><br>*2 carrier: RR: 3.82 (2.23-6.54)                                                                                                                                                                                    | Sofi, <i>et al.</i> 2011 (86)     |
| Meta-analysis of <i>CYP2C19</i> LOF alleles:<br>- 9 studies<br>- 9,685 total patients<br>- established CAD (91% PCI) | August 2010          | <b>MACE:</b><br>Heterozygotes: HR: 1.55 (1.11-2.17)<br>Homozygotes: HR: 1.76 (1.24-2.50)<br><b>ST:</b><br>Heterozygotes: HR: 2.67 (1.69-4.22)<br>Homozygotes: HR: 3.97 (1.75-9.02)                                                                                                    | Mega, <i>et al.</i> 2010 (7)      |
| Meta-analysis of <i>CYP2C19</i> LOF and GOF alleles:<br>- 11 studies (for <i>CYP2C19</i> loss-of-function alleles)   | October 2010         | <b>MACE:</b><br>*2 carrier: Not significant.                                                                                                                                                                                                                                          | Zabalza, <i>et al.</i> 2012 (149) |

|                                                                                                                                                                               |                |                                                                                                                                                                                                                                                                                                   |                                     |
|-------------------------------------------------------------------------------------------------------------------------------------------------------------------------------|----------------|---------------------------------------------------------------------------------------------------------------------------------------------------------------------------------------------------------------------------------------------------------------------------------------------------|-------------------------------------|
| - 16,360 total patients (for <i>CYP2C19</i> loss-of-function alleles)<br>- CAD and others                                                                                     |                | *17 carrier: HR: 0.75 (0.66-0.87)<br><b>ST:</b><br>*2 carrier: HR: 2.24 (1.52-3.30)<br><b>Major bleeding:</b><br>*17 carrier: HR: 1.26 (1.05-1.50)                                                                                                                                                |                                     |
| Meta-analysis of <i>CYP2C19</i> LOF and GOF alleles:<br>- 12 studies<br>- 18,529 total patients<br>- established CAD                                                          | December 2010  | <b>MACE:</b><br>LOF carrier: Not significant.<br><b>ST:</b><br>LOF carrier: OR: 1.77 (1.31-2.40)                                                                                                                                                                                                  | Bauer, <i>et al.</i> 2011 (150)     |
| Meta-analysis of <i>CYP2C19</i> LOF alleles:<br>- 16 studies<br>- 20,785 total patients<br>- established CAD                                                                  | September 2011 | <b>MACE:</b><br>*2 carrier: OR: 1.42 (1.13-1.78)<br>Heterozygotes: OR: 1.43 (0.93-2.19)<br>Homozygotes: OR: 1.75 (1.23-2.51)<br><b>Cardiac mortality:</b><br>*2 carrier: OR: 2.18 (1.37–3.47)<br><b>MI:</b><br>*2 carrier: OR: 1.42 (1.12-1.81)<br><b>ST:</b><br>*2 carrier: OR: 2.41 (1.76-3.30) | Jang, <i>et al.</i> 2012 (151)      |
| Meta-analysis of <i>CYP2C19</i> LOF and GOF alleles:<br>- 32 studies<br>- 42,016 total patients<br>- unselected                                                               | October 2011   | <b>MACE:</b><br>LOF carrier: Not significant.<br><b>Stent thrombosis:</b><br>LOF carrier: RR: 1.75 (1.50-2.03)                                                                                                                                                                                    | Holmes, <i>et al.</i> 2011 (89)     |
| Meta-analysis of <i>CYP2C19</i> *2 and VerifyNow® platelet testing:<br>- 7 studies (for <i>CYP2C19</i> )<br>- 5,307 total patients (for <i>CYP2C19</i> )<br>- established CAD | October 2011   | <b>MACE:</b><br>*2 carrier: Not significant.<br><b>Stent thrombosis:</b><br>*2 carrier: OR: 2.65 (1.46-4.84)                                                                                                                                                                                      | Yamaguchi, <i>et al.</i> 2012 (152) |
| Meta-analysis of <i>CYP2C19</i> *2 and <i>ABCB1</i> c.3435C>T:<br>- 14 studies<br>- 19,601 total patients                                                                     |                | <b>MACE:</b><br>*2 carrier: RR: 1.28 (1.06-1.54)<br><b>Cardiac mortality:</b><br>*2 carrier: RR: 3.21 (1.65–6.23)                                                                                                                                                                                 | Singh, <i>et al.</i> 2012 (153)     |

|                   |  |                                                                                                  |  |
|-------------------|--|--------------------------------------------------------------------------------------------------|--|
| - established CAD |  | <b>MI:</b><br>*2 carrier: RR: 1.36 (1.12-1.65)<br><b>ST:</b><br>*2 carrier: RR: 2.41 (1.69-3.41) |  |
|-------------------|--|--------------------------------------------------------------------------------------------------|--|

CAD: coronary artery disease; GOF: gain-of-function; HR: hazard ratio; LOF: loss-of-function; MACE: major adverse cardiovascular event; MI: myocardial infarction; OR: odds ratio; PPI: proton pump inhibitor; RR: relative risk; ST: stent thrombosis.

\* See above for description of ‘**Levels of Evidence Linking Genotype to Phenotype**’.

**Supplemental Table S8. Evidence linking *CYP2C19* genotype with phenotype (CLOPIDOGREL DOSE ESCALATION)**

| Study Endpoints                                                  | Major Findings                                                                                                                                                                    | References                                                                                                                                                                                                                                                                                                    | Level of Evidence* |
|------------------------------------------------------------------|-----------------------------------------------------------------------------------------------------------------------------------------------------------------------------------|---------------------------------------------------------------------------------------------------------------------------------------------------------------------------------------------------------------------------------------------------------------------------------------------------------------|--------------------|
| <i>Ex vivo</i> platelet aggregation                              | Higher-dose clopidogrel can increase the degree of platelet inhibition in healthy subjects heterozygous for <i>CYP2C19</i> LOF alleles                                            | Simon, <i>et al.</i> 2011 (57)                                                                                                                                                                                                                                                                                | High               |
| <i>Ex vivo</i> platelet aggregation                              | Higher-dose clopidogrel can increase the degree of platelet inhibition in patients heterozygous for <i>CYP2C19</i> LOF alleles but less so in patients homozygous for LOF alleles | Gladding, <i>et al.</i> 2008 (154),<br>Gladding, <i>et al.</i> 2009 (40),<br>Barker, <i>et al.</i> 2010 (155),<br>Bonello, <i>et al.</i> 2010 (156),<br>Alexopoulos, <i>et al.</i> , 2011 (157),<br>Collet, <i>et al.</i> 2011 (114),<br>Cuisset, <i>et al.</i> 2011 (122),<br>Mega, <i>et al.</i> 2011 (158) | High               |
| Clinical: composite end point of cardiovascular death, MI and ST | Higher dose clopidogrel on the basis of platelet function monitoring does not result in clinical benefit among ACS/PCI patients.                                                  | Price, <i>et al.</i> 2011 (159),<br>Collet, <i>et al.</i> 2012 (160)                                                                                                                                                                                                                                          | High               |

ACS: acute coronary syndrome; LOF: loss-of-function; PCI: percutaneous coronary intervention.

\* See above for description of ‘Levels of Evidence Linking Genotype to Phenotype’

## References

- (1) Hulot, J.S. *et al.* Cytochrome P450 2C19 loss-of-function polymorphism is a major determinant of clopidogrel responsiveness in healthy subjects. *Blood* **108**, 2244-7 (2006).
- (2) Mega, J.L. *et al.* Cytochrome p-450 polymorphisms and response to clopidogrel. *N Engl J Med* **360**, 354-62 (2009).
- (3) Shuldiner, A.R. *et al.* Association of cytochrome P450 2C19 genotype with the antiplatelet effect and clinical efficacy of clopidogrel therapy. *JAMA* **302**, 849-57 (2009).
- (4) Sibbing, D. *et al.* Cytochrome P450 2C19 loss-of-function polymorphism and stent thrombosis following percutaneous coronary intervention. *Eur Heart J* **30**, 916-22 (2009).
- (5) Simon, T. *et al.* Genetic determinants of response to clopidogrel and cardiovascular events. *N Engl J Med* **360**, 363-75 (2009).
- (6) Hulot, J.S. *et al.* Cardiovascular risk in clopidogrel-treated patients according to cytochrome P450 2C19\*2 loss-of-function allele or proton pump inhibitor coadministration: a systematic meta-analysis. *J Am Coll Cardiol* **56**, 134-43 (2010).
- (7) Mega, J.L. *et al.* Reduced-function CYP2C19 genotype and risk of adverse clinical outcomes among patients treated with clopidogrel predominantly for PCI: a meta-analysis. *JAMA* **304**, 1821-30 (2010).
- (8) Mega, J.L. *et al.* Genetic variants in ABCB1 and CYP2C19 and cardiovascular outcomes after treatment with clopidogrel and prasugrel in the TRITON-TIMI 38 trial: a pharmacogenetic analysis. *Lancet* **376**, 1312-9 (2010).
- (9) Wallentin, L. *et al.* Effect of CYP2C19 and ABCB1 single nucleotide polymorphisms on outcomes of treatment with ticagrelor versus clopidogrel for acute coronary syndromes: a genetic substudy of the PLATO trial. *Lancet* **376**, 1320-8 (2010).
- (10) Cayla, G. *et al.* Clinical, angiographic, and genetic factors associated with early coronary stent thrombosis. *JAMA* **306**, 1765-74 (2011).
- (11) Ellis, K.J., Stouffer, G.A., McLeod, H.L. & Lee, C.R. Clopidogrel pharmacogenomics and risk of inadequate platelet inhibition: US FDA recommendations. *Pharmacogenomics* **10**, 1799-817 (2009).
- (12) Becquemont, L. *et al.* Practical recommendations for pharmacogenomics-based prescription: 2010 ESF-UB Conference on Pharmacogenetics and Pharmacogenomics. *Pharmacogenomics* **12**, 113-24 (2010).
- (13) Damani, S.B. & Topol, E.J. The case for routine genotyping in dual-antiplatelet therapy. *J Am Coll Cardiol* **56**, 109-11 (2010).
- (14) Giusti, B., Gori, A.M., Marcucci, R. & Abbate, R. Relation of CYP2C19 loss-of-function polymorphism to the occurrence of stent thrombosis. *Expert Opin Drug Metab Toxicol* **6**, 393-407 (2010).
- (15) Gurbel, P.A., Tantry, U.S., Shuldiner, A.R. & Kereiakes, D.J. Genotyping: one piece of the puzzle to personalize antiplatelet therapy. *J Am Coll Cardiol* **56**, 112-6 (2010).
- (16) Holmes, D.R., Jr., Dehmer, G.J., Kaul, S., Leifer, D., O'Gara, P.T. & Stein, C.M. ACCF/AHA clopidogrel clinical alert: approaches to the FDA "boxed warning": a report of the American College of Cardiology Foundation Task Force on clinical expert consensus documents and the American Heart Association endorsed by the Society for Cardiovascular Angiography and Interventions and the Society of Thoracic Surgeons. *J Am Coll Cardiol* **56**, 321-41 (2010).



- (17) Ned Mmsc Phd, R.M. Genetic testing for CYP450 polymorphisms to predict response to clopidogrel: current evidence and test availability. Application: pharmacogenomics. *PLoS Curr* **2**, (2010).
- (18) Roden, D.M. & Shuldiner, A.R. Responding to the clopidogrel warning by the US food and drug administration: real life is complicated. *Circulation* **122**, 445-8 (2010).
- (19) Wilffert, B., Swen, J., Mulder, H., Touw, D., Maitland-Van der Zee, A.H. & Deneer, V. From evidence based medicine to mechanism based medicine. Reviewing the role of pharmacogenetics. *Int J Clin Pharm* **33**, 3-9 (2011).
- (20) Ma, T.K., Lam, Y.Y., Tan, V.P. & Yan, B.P. Variability in response to clopidogrel: how important are pharmacogenetics and drug interactions? *Br J Clin Pharmacol*, (2011).
- (21) Rosenberg, N.A., Mahajan, S., Ramachandran, S., Zhao, C., Pritchard, J.K. & Feldman, M.W. Clines, clusters, and the effect of study design on the inference of human population structure. *PLoS Genet* **1**, e70 (2005).
- (22) Rosenberg, N.A. *et al.* Genetic structure of human populations. *Science* **298**, 2381-5 (2002).
- (23) Scott, S.A. *et al.* PharmGKB summary: very important pharmacogene information for cytochrome P450, family 2, subfamily C, polypeptide 19. *Pharmacogenet Genomics* **22**, 159-65 (2012).
- (24) Buchan, B.W. *et al.* Evaluation of a microarray-based genotyping assay for the rapid detection of cytochrome P450 2C19 \*2 and \*3 polymorphisms from whole blood using nanoparticle probes. *Am J Clin Pathol* **136**, 604-8 (2011).
- (25) Saracini, C., Vestrini, A., Galora, S., Armillis, A., Abbate, R. & Giusti, B. Pharmacogenetics of clopidogrel: comparison between a standard and a rapid genetic testing. *Genet Test Mol Biomarkers* **16**, 500-3 (2012).
- (26) Lee, C.C., McMillin, G.A., Babic, N., Melis, R. & Yeo, K.T. Evaluation of a CYP2C19 genotype panel on the GenMark eSensor(R) platform and the comparison to the Autogenomics Infiniti and Luminex CYP2C19 panels. *Clin Chim Acta* **412**, 1133-7 (2011).
- (27) Roberts, J.D. *et al.* Point-of-care genetic testing for personalisation of antiplatelet treatment (RAPID GENE): a prospective, randomised, proof-of-concept trial. *Lancet* **379**, 1705-11 (2012).
- (28) Collet, J.P. *et al.* Cytochrome P450 2C19 polymorphism in young patients treated with clopidogrel after myocardial infarction: a cohort study. *Lancet* **373**, 309-17 (2009).
- (29) Sibbing, D. *et al.* Cytochrome 2C19\*17 allelic variant, platelet aggregation, bleeding events, and stent thrombosis in clopidogrel-treated patients with coronary stent placement. *Circulation* **121**, 512-8 (2010).
- (30) Trenk, D. *et al.* Cytochrome P450 2C19 681G>A polymorphism and high on-clopidogrel platelet reactivity associated with adverse 1-year clinical outcome of elective percutaneous coronary intervention with drug-eluting or bare-metal stents. *J Am Coll Cardiol* **51**, 1925-34 (2008).
- (31) Geisler, T. *et al.* CYP2C19 and nongenetic factors predict poor responsiveness to clopidogrel loading dose after coronary stent implantation. *Pharmacogenomics* **9**, 1251-9 (2008).
- (32) Brandt, J.T. *et al.* Common polymorphisms of CYP2C19 and CYP2C9 affect the pharmacokinetic and pharmacodynamic response to clopidogrel but not prasugrel. *J Thromb Haemost* **5**, 2429-36 (2007).

- (33) Frere, C. *et al.* Effect of cytochrome p450 polymorphisms on platelet reactivity after treatment with clopidogrel in acute coronary syndrome. *Am J Cardiol* **101**, 1088-93 (2008).
- (34) Richards, C.S. *et al.* ACMG recommendations for standards for interpretation and reporting of sequence variations: Revisions 2007. *Genet Med* **10**, 294-300 (2008).
- (35) Li, Y., Tang, H.L., Hu, Y.F. & Xie, H.G. The gain-of-function variant allele CYP2C19\*17: a double-edged sword between thrombosis and bleeding in clopidogrel-treated patients. *J Thromb Haemost* **10**, 199-206 (2012).
- (36) Gurbel, P.A., Shuldiner, A.R., Bliden, K.P., Ryan, K., Pakyz, R.E. & Tantry, U.S. The relation between CYP2C19 genotype and phenotype in stented patients on maintenance dual antiplatelet therapy. *Am Heart J* **161**, 598-604 (2011).
- (37) Sorich, M.J., Polasek, T.M. & Wiese, M.D. Systematic review and meta-analysis of the association between cytochrome P450 2C19 genotype and bleeding. *Thromb Haemost* **108**, 199-200 (2012).
- (38) Scott, S.A., Martis, S., Peter, I., Kasai, Y., Kornreich, R. & Desnick, R.J. Identification of CYP2C19\*4B: pharmacogenetic implications for drug metabolism including clopidogrel responsiveness. *Pharmacogenomics J* **12**, 297-305 (2012).
- (39) Lewis, J.P. *et al.* The functional G143E variant of carboxylesterase 1 is associated with increased clopidogrel active metabolite levels and greater clopidogrel response. *Pharmacogenet Genomics*, (2012).
- (40) Gladding, P. *et al.* Pharmacogenetic testing for clopidogrel using the rapid INFINITI analyzer: a dose-escalation study. *JACC Cardiovasc Interv* **2**, 1095-101 (2009).
- (41) Harmsze, A. *et al.* Besides CYP2C19\*2, the variant allele CYP2C9\*3 is associated with higher on-clopidogrel platelet reactivity in patients on dual antiplatelet therapy undergoing elective coronary stent implantation. *Pharmacogenet Genomics* **20**, 18-25 (2010).
- (42) Lau, W.C. *et al.* Contribution of hepatic cytochrome P450 3A4 metabolic activity to the phenomenon of clopidogrel resistance. *Circulation* **109**, 166-71 (2004).
- (43) Fontana, P. *et al.* Adenosine diphosphate-induced platelet aggregation is associated with P2Y12 gene sequence variations in healthy subjects. *Circulation* **108**, 989-95 (2003).
- (44) Malek, L.A. *et al.* Coexisting polymorphisms of P2Y12 and CYP2C19 genes as a risk factor for persistent platelet activation with clopidogrel. *Circ J* **72**, 1165-9 (2008).
- (45) Bouman, H.J. *et al.* Paraoxonase-1 is a major determinant of clopidogrel efficacy. *Nat Med*, (2010).
- (46) Hulot, J.S. *et al.* CYP2C19 but not PON1 genetic variants influence clopidogrel pharmacokinetics, pharmacodynamics, and clinical efficacy in post-myocardial infarction patients. *Circ Cardiovasc Interv* **4**, 422-8 (2011).
- (47) Lewis, J.P. *et al.* Paraoxonase 1 (PON1) gene variants are not associated with clopidogrel response. *Clin Pharmacol Ther* **90**, 568-74 (2011).
- (48) Sibbing, D. *et al.* No association of paraoxonase-1 Q192R genotypes with platelet response to clopidogrel and risk of stent thrombosis after coronary stenting. *Eur Heart J* **32**, 1605-13 (2011).
- (49) Simon, T. *et al.* Effect of paraoxonase-1 polymorphism on clinical outcomes in patients treated with clopidogrel after an acute myocardial infarction. *Clin Pharmacol Ther* **90**, 561-7 (2011).

- (50) Trenk, D. *et al.* Paraoxonase-1 Q192R polymorphism and antiplatelet effects of clopidogrel in patients undergoing elective coronary stent placement. *Circ Cardiovasc Genet* **4**, 429-36 (2011).
- (51) Ancrenaz, V. *et al.* The paraoxonase-1 pathway is not a major bioactivation pathway of clopidogrel in vitro. *Br J Pharmacol* **166**, 2362-70 (2012).
- (52) Gong, I.Y. *et al.* Clarifying the importance of CYP2C19 and PON1 in the mechanism of clopidogrel bioactivation and in vivo antiplatelet response. *Eur Heart J* **33**, 2856-64 (2012).
- (53) Reny, J.L., Combescure, C., Daali, Y. & Fontana, P. Influence of the paraoxonase-1 Q192R genetic variant on clopidogrel responsiveness and recurrent cardiovascular events: a systematic review and meta-analysis. *J Thromb Haemost* **10**, 1242-51 (2012).
- (54) Taubert, D. *et al.* Impact of P-glycoprotein on clopidogrel absorption. *Clin Pharmacol Ther* **80**, 486-501 (2006).
- (55) Campo, G. *et al.* Prospective evaluation of on-clopidogrel platelet reactivity over time in patients treated with percutaneous coronary intervention relationship with gene polymorphisms and clinical outcome. *J Am Coll Cardiol* **57**, 2474-83 (2011).
- (56) Price, M.J. *et al.* Influence of genetic polymorphisms on the effect of high- and standard-dose clopidogrel after percutaneous coronary intervention: the GIFT (Genotype Information and Functional Testing) study. *J Am Coll Cardiol* **59**, 1928-37 (2012).
- (57) Simon, T. *et al.* Genetic polymorphisms and the impact of a higher clopidogrel dose regimen on active metabolite exposure and antiplatelet response in healthy subjects. *Clin Pharmacol Ther* **90**, 287-95 (2011).
- (58) Verschuren, J.J. *et al.* Value of platelet pharmacogenetics in common clinical practice of patients with ST-segment elevation myocardial infarction. *International journal of cardiology*, (2012).
- (59) Su, J. *et al.* ABCB1 C3435T polymorphism and response to clopidogrel treatment in coronary artery disease (CAD) patients: a meta-analysis. *PloS one* **7**, e46366 (2012).
- (60) Carlquist, J.F. *et al.* Cardiovascular risk among patients on clopidogrel anti-platelet therapy after placement of drug-eluting stents is modified by genetic variants in both the CYP2C19 and ABCB1 genes. *Thromb Haemost* **109**, (2013).
- (61) Tang, M. *et al.* Antiplatelet agents aspirin and clopidogrel are hydrolyzed by distinct carboxylesterases, and clopidogrel is transesterificated in the presence of ethyl alcohol. *J Pharmacol Exp Ther* **319**, 1467-76 (2006).
- (62) Zhu, H.J. *et al.* Two CES1 gene mutations lead to dysfunctional carboxylesterase 1 activity in man: clinical significance and molecular basis. *American journal of human genetics* **82**, 1241-8 (2008).
- (63) Ancrenaz, V. *et al.* Impact of genetic polymorphisms and drug-drug interactions on clopidogrel and prasugrel response variability. *Current drug metabolism* **11**, 667-77 (2010).
- (64) Zhu, H.J., Wang, X., Gawronski, B., Brinda, B., Angiolillo, D. & Markowitz, J. Carboxylesterase 1 as a determinant of clopidogrel metabolism and activation. *J Pharmacol Exp Ther*, (2013).
- (65) Fontana, P., Gaussem, P., Aiach, M., Fiessinger, J.N., Emmerich, J. & Reny, J.L. P2Y12 H2 haplotype is associated with peripheral arterial disease: a case-control study. *Circulation* **108**, 2971-3 (2003).

- (66) Szymezak, J. *et al.* High on-clopidogrel platelet reactivity: genotyping can help to optimize antiplatelet treatment. *Thromb Res* **128**, 92-5 (2011).
- (67) von Beckerath, N., von Beckerath, O., Koch, W., Eichinger, M., Schomig, A. & Kastrati, A. P2Y12 gene H2 haplotype is not associated with increased adenosine diphosphate-induced platelet aggregation after initiation of clopidogrel therapy with a high loading dose. *Blood coagulation & fibrinolysis : an international journal in haemostasis and thrombosis* **16**, 199-204 (2005).
- (68) Angiolillo, D.J. *et al.* Lack of association between the P2Y12 receptor gene polymorphism and platelet response to clopidogrel in patients with coronary artery disease. *Thromb Res* **116**, 491-7 (2005).
- (69) Lev, E.I., Patel, R.T., Guthikonda, S., Lopez, D., Bray, P.F. & Kleiman, N.S. Genetic polymorphisms of the platelet receptors P2Y(12), P2Y(1) and GP IIIa and response to aspirin and clopidogrel. *Thromb Res* **119**, 355-60 (2007).
- (70) Smith, S.M. *et al.* Common sequence variations in the P2Y12 and CYP3A5 genes do not explain the variability in the inhibitory effects of clopidogrel therapy. *Platelets* **17**, 250-8 (2006).
- (71) Bura, A., Bachelot-Loza, C., Ali, F.D., Aiach, M. & Gaussem, P. Role of the P2Y12 gene polymorphism in platelet responsiveness to clopidogrel in healthy subjects. *J Thromb Haemost* **4**, 2096-7 (2006).
- (72) Staritz, P., Kurz, K., Stoll, M., Giannitsis, E., Katus, H.A. & Ivandic, B.T. Platelet reactivity and clopidogrel resistance are associated with the H2 haplotype of the P2Y12-ADP receptor gene. *International journal of cardiology* **133**, 341-5 (2009).
- (73) Giusti, B. *et al.* Cytochrome P450 2C19 loss-of-function polymorphism, but not CYP3A4 IVS10 + 12G/A and P2Y12 T744C polymorphisms, is associated with response variability to dual antiplatelet treatment in high-risk vascular patients. *Pharmacogenet Genomics* **17**, 1057-64 (2007).
- (74) Namazi, S., Kojuri, J., Khalili, A. & Azarpira, N. The impact of genetic polymorphisms of P2Y12, CYP3A5 and CYP2C19 on clopidogrel response variability in Iranian patients. *Biochem Pharmacol* **83**, 903-8 (2012).
- (75) Humbert, R., Adler, D.A., Distechi, C.M., Hassett, C., Omiecinski, C.J. & Furlong, C.E. The molecular basis of the human serum paraoxonase activity polymorphism. *Nature genetics* **3**, 73-6 (1993).
- (76) Mackness, B., Mackness, M.I., Arrol, S., Turkie, W. & Durrington, P.N. Effect of the molecular polymorphisms of human paraoxonase (PON1) on the rate of hydrolysis of paraoxon. *Br J Pharmacol* **122**, 265-8 (1997).
- (77) Mackness, B., Mackness, M.I., Arrol, S., Turkie, W. & Durrington, P.N. Effect of the human serum paraoxonase 55 and 192 genetic polymorphisms on the protection by high density lipoprotein against low density lipoprotein oxidative modification. *FEBS letters* **423**, 57-60 (1998).
- (78) Kreutz, R.P. *et al.* Influence of paraoxonase-1 Q192R and cytochrome P450 2C19 polymorphisms on clopidogrel response. *Clin Pharmacol* **4**, 13-20 (2012).
- (79) Pare, G. *et al.* Effect of PON1 Q192R genetic polymorphism on clopidogrel efficacy and cardiovascular events in the Clopidogrel in the Unstable Angina to Prevent Recurrent Events trial and the Atrial Fibrillation Clopidogrel Trial with Irbesartan for Prevention of Vascular Events. *Circ Cardiovasc Genet* **5**, 250-6 (2012).

- (80) Delaney, J.T. *et al.* Predicting clopidogrel response using DNA samples linked to an electronic health record. *Clin Pharmacol Ther* **91**, 257-63 (2012).
- (81) Campo, G., Ferraresi, P., Marchesini, J., Bernardi, F. & Valgimigli, M. Relationship between paraoxonase Q192R gene polymorphism and on-clopidogrel platelet reactivity over time in patients treated with percutaneous coronary intervention. *J Thromb Haemost* **9**, 2106-8 (2011).
- (82) Kim, K.A., Park, P.W., Hong, S.J. & Park, J.Y. The effect of CYP2C19 polymorphism on the pharmacokinetics and pharmacodynamics of clopidogrel: a possible mechanism for clopidogrel resistance. *Clin Pharmacol Ther* **84**, 236-42 (2008).
- (83) Umemura, K., Furuta, T. & Kondo, K. The common gene variants of CYP2C19 affect pharmacokinetics and pharmacodynamics in an active metabolite of clopidogrel in healthy subjects. *J Thromb Haemost* **6**, 1439-41 (2008).
- (84) Varenhorst, C. *et al.* Genetic variation of CYP2C19 affects both pharmacokinetic and pharmacodynamic responses to clopidogrel but not prasugrel in aspirin-treated patients with coronary artery disease. *Eur Heart J* **30**, 1744-52 (2009).
- (85) Sofi, F., Giusti, B., Marcucci, R., Gori, A.M., Abbate, R. & Gensini, G.F. Cytochrome P450 2C19(\*2) polymorphism and cardiovascular recurrences in patients taking clopidogrel: a meta-analysis. *Pharmacogenomics J*, (2010).
- (86) Sofi, F., Giusti, B., Marcucci, R., Gori, A.M., Abbate, R. & Gensini, G.F. Cytochrome P450 2C19\*2 polymorphism and cardiovascular recurrences in patients taking clopidogrel: a meta-analysis. *Pharmacogenomics J* **11**, 199-206 (2011).
- (87) Fuster, V. & Sweeny, J.M. Clopidogrel and the reduced-function CYP2C19 genetic variant: a limited piece of the overall therapeutic puzzle. *JAMA* **304**, 1839-40 (2010).
- (88) Pare, G. *et al.* Effects of CYP2C19 genotype on outcomes of clopidogrel treatment. *N Engl J Med* **363**, 1704-14 (2010).
- (89) Holmes, M.V., Perel, P., Shah, T., Hingorani, A.D. & Casas, J.P. CYP2C19 genotype, clopidogrel metabolism, platelet function, and cardiovascular events: a systematic review and meta-analysis. *JAMA* **306**, 2704-14 (2011).
- (90) Hulot, J.S., Collet, J.P. & Montalescot, G. Genetic substudy of the PLATO trial. *Lancet* **377**, 637, author reply -8 (2011).
- (91) Johnson, J.A., Roden, D.M., Lesko, L.J., Ashley, E., Klein, T.E. & Shuldiner, A.R. Clopidogrel: a case for indication-specific pharmacogenetics. *Clin Pharmacol Ther* **91**, 774-6 (2012).
- (92) Valdes, R., Payne, D.A. & Linder, M.W. Laboratory analysis and application of pharmacogenetics to clinical practice. *The National Academy of Clinical Biochemistry (NACB) - Laboratory Medicine Practice Guidelines*, Washington, DC (2010).
- (93) Panel on Antiretroviral Guidelines for Adults and Adolescents. *Guidelines for the use of antiretroviral agents in HIV-1-infected adults and adolescents. December 1, 2009; 1-161. Page 2, Table #2. <<http://www.aidsinfo.nih.gov/ContentFiles/AdultandAdolescentGL.pdf>>*. Accessed June 25, 2006.
- (94) Relling, M.V. & Klein, T.E. CPIC: Clinical Pharmacogenetics Implementation Consortium of the Pharmacogenomics Research Network. *Clin Pharmacol Ther* **89**, 464-7 (2011).

- (95) Romkes, M., Faletto, M.B., Blaisdell, J.A., Raucy, J.L. & Goldstein, J.A. Cloning and expression of complementary DNAs for multiple members of the human cytochrome P450IIC subfamily. *Biochemistry* **30**, 3247-55 (1991).
- (96) de Morais, S.M., Wilkinson, G.R., Blaisdell, J., Nakamura, K., Meyer, U.A. & Goldstein, J.A. The major genetic defect responsible for the polymorphism of S-mephenytoin metabolism in humans. *J Biol Chem* **269**, 15419-22 (1994a).
- (97) De Morais, S.M., Wilkinson, G.R., Blaisdell, J., Meyer, U.A., Nakamura, K. & Goldstein, J.A. Identification of a new genetic defect responsible for the polymorphism of (S)-mephenytoin metabolism in Japanese. *Mol Pharmacol* **46**, 594-8 (1994b).
- (98) Xiao, Z.S. *et al.* Differences in the incidence of the CYP2C19 polymorphism affecting the S-mephenytoin phenotype in Chinese Han and Bai populations and identification of a new rare CYP2C19 mutant allele. *J Pharmacol Exp Ther* **281**, 604-9 (1997).
- (99) Ferguson, R.J. *et al.* A new genetic defect in human CYP2C19: mutation of the initiation codon is responsible for poor metabolism of S-mephenytoin. *J Pharmacol Exp Ther* **284**, 356-61 (1998).
- (100) Ibeanu, G.C. *et al.* An additional defective allele, CYP2C19\*5, contributes to the S-mephenytoin poor metabolizer phenotype in Caucasians. *Pharmacogenetics* **8**, 129-35 (1998).
- (101) Ibeanu, G.C. *et al.* Identification of new human CYP2C19 alleles (CYP2C19\*6 and CYP2C19\*2B) in a Caucasian poor metabolizer of mephenytoin. *J Pharmacol Exp Ther* **286**, 1490-5 (1998).
- (102) Ibeanu, G.C. *et al.* A novel transversion in the intron 5 donor splice junction of CYP2C19 and a sequence polymorphism in exon 3 contribute to the poor metabolizer phenotype for the anticonvulsant drug S-mephenytoin. *J Pharmacol Exp Ther* **290**, 635-40 (1999).
- (103) Sim, S.C. *et al.* A common novel CYP2C19 gene variant causes ultrarapid drug metabolism relevant for the drug response to proton pump inhibitors and antidepressants. *Clin Pharmacol Ther* **79**, 103-13 (2006).
- (104) Rudberg, I., Mohebi, B., Hermann, M., Refsum, H. & Molden, E. Impact of the ultrarapid CYP2C19\*17 allele on serum concentration of escitalopram in psychiatric patients. *Clin Pharmacol Ther* **83**, 322-7 (2008).
- (105) Li-Wan-Po, A., Girard, T., Farndon, P., Cooley, C. & Lithgow, J. Pharmacogenetics of CYP2C19: functional and clinical implications of a new variant CYP2C19\*17. *Br J Clin Pharmacol* **69**, 222-30 (2010).
- (106) Sibbing, D. *et al.* Isolated and interactive impact of common CYP2C19 genetic variants on the antiplatelet effect of chronic clopidogrel therapy. *J Thromb Haemost* **8**, 1685-93 (2010).
- (107) Savi, P. *et al.* Importance of hepatic metabolism in the antiaggregating activity of the thienopyridine clopidogrel. *Biochem Pharmacol* **44**, 527-32 (1992).
- (108) Savi, P. *et al.* Identification and biological activity of the active metabolite of clopidogrel. *Thromb Haemost* **84**, 891-6 (2000).
- (109) Clarke, T.A. & Waskell, L.A. The metabolism of clopidogrel is catalyzed by human cytochrome P450 3A and is inhibited by atorvastatin. *Drug Metab Dispos* **31**, 53-9 (2003).
- (110) Farid, N.A. *et al.* Cytochrome P450 3A inhibition by ketoconazole affects prasugrel and clopidogrel pharmacokinetics and pharmacodynamics differently. *Clin Pharmacol Ther* **81**, 735-41 (2007).

- (111) Kazui, M. *et al.* Identification of the human cytochrome P450 enzymes involved in the two oxidative steps in the bioactivation of clopidogrel to its pharmacologically active metabolite. *Drug Metab Dispos* **38**, 92-9 (2010).
- (112) Abell, L.M. & Liu, E.C. Dissecting the activation of thienopyridines by cytochromes P450 using a pharmacodynamic assay in vitro. *J Pharmacol Exp Ther* **339**, 589-96 (2011).
- (113) Kelly, R.P. *et al.* Pharmacokinetics and pharmacodynamics following maintenance doses of prasugrel and clopidogrel in Chinese carriers of CYP2C19 variants. *Br J Clin Pharmacol* **73**, 93-105 (2012).
- (114) Collet, J.P. *et al.* High doses of clopidogrel to overcome genetic resistance: the randomized crossover CLOVIS-2 (Clopidogrel and Response Variability Investigation Study 2). *JACC Cardiovasc Interv* **4**, 392-402 (2011).
- (115) Fontana, P., Hulot, J.S., De Moerloose, P. & Gaussem, P. Influence of CYP2C19 and CYP3A4 gene polymorphisms on clopidogrel responsiveness in healthy subjects. *J Thromb Haemost* **5**, 2153-5 (2007).
- (116) Chen, B.L. *et al.* Inhibition of ADP-induced platelet aggregation by clopidogrel is related to CYP2C19 genetic polymorphisms. *Clin Exp Pharmacol Physiol* **35**, 904-8 (2008).
- (117) Jinnai, T. *et al.* Impact of CYP2C19 polymorphisms on the antiplatelet effect of clopidogrel in an actual clinical setting in Japan. *Circ J* **73**, 1498-503 (2009).
- (118) Hochholzer, W. *et al.* Impact of cytochrome P450 2C19 loss-of-function polymorphism and of major demographic characteristics on residual platelet function after loading and maintenance treatment with clopidogrel in patients undergoing elective coronary stent placement. *J Am Coll Cardiol* **55**, 2427-34 (2010).
- (119) Jeong, Y.H. *et al.* Carriage of cytochrome 2C19 polymorphism is associated with risk of high post-treatment platelet reactivity on high maintenance-dose clopidogrel of 150 mg/day: results of the ACCEL-DOUBLE (Accelerated Platelet Inhibition by a Double Dose of Clopidogrel According to Gene Polymorphism) study. *JACC Cardiovasc Interv* **3**, 731-41 (2010).
- (120) Kang, M.K. *et al.* Pre-procedural platelet reactivity after clopidogrel loading in Korean patients undergoing scheduled percutaneous coronary intervention. *J Atheroscler Thromb* **17**, 1122-31 (2010).
- (121) Bouman, H.J. *et al.* Variability in on-treatment platelet reactivity explained by CYP2C19\*2 genotype is modest in clopidogrel pretreated patients undergoing coronary stenting. *Heart* **97**, 1239-44 (2011).
- (122) Cuisset, T. *et al.* Usefulness of high clopidogrel maintenance dose according to CYP2C19 genotypes in clopidogrel low responders undergoing coronary stenting for non ST elevation acute coronary syndrome. *Am J Cardiol* **108**, 760-5 (2011).
- (123) Hwang, S.J. *et al.* The cytochrome 2C19\*2 and \*3 alleles attenuate response to clopidogrel similarly in East Asian patients undergoing elective percutaneous coronary intervention. *Thromb Res* **127**, 23-8 (2011).
- (124) Jeong, Y.H. *et al.* Effect of CYP2C19\*2 and \*3 loss-of-function alleles on platelet reactivity and adverse clinical events in East Asian acute myocardial infarction survivors treated with clopidogrel and aspirin. *Circ Cardiovasc Interv* **4**, 585-94 (2011).
- (125) Maeda, A. *et al.* Differential impacts of CYP2C19 gene polymorphisms on the antiplatelet effects of clopidogrel and ticlopidine. *Clin Pharmacol Ther* **89**, 229-33 (2011).

- (126) Ono, T. *et al.* Determination of cut-off levels for on-clopidogrel platelet aggregation based on functional CYP2C19 gene variants in patients undergoing elective percutaneous coronary intervention. *Thromb Res* **128**, e130-6 (2011).
- (127) Park, K.J., Chung, H.S., Kim, S.R., Kim, H.J., Han, J.Y. & Lee, S.Y. Clinical, pharmacokinetic, and pharmacogenetic determinants of clopidogrel resistance in Korean patients with acute coronary syndrome. *Korean J Lab Med* **31**, 91-4 (2011).
- (128) Rideg, O. *et al.* Impact of genetic variants on post-clopidogrel platelet reactivity in patients after elective percutaneous coronary intervention. *Pharmacogenomics* **12**, 1269-80 (2011).
- (129) Yamamoto, K. *et al.* Impact of CYP2C19 polymorphism on residual platelet reactivity in patients with coronary heart disease during antiplatelet therapy. *J Cardiol* **57**, 194-201 (2011).
- (130) Bonello, L. *et al.* Factors associated with the failure of clopidogrel dose-adjustment according to platelet reactivity monitoring to optimize P2Y<sub>12</sub>-ADP receptor blockade. *Thromb Res* **130**, 70-4 (2012).
- (131) Harmsze, A.M. *et al.* The influence of CYP2C19\*2 and \*17 on on-treatment platelet reactivity and bleeding events in patients undergoing elective coronary stenting. *Pharmacogenet Genomics* **22**, 169-75 (2012).
- (132) Kassimis, G., Davlourous, P., Xanthopoulou, I., Stavrou, E.F., Athanassiadou, A. & Alexopoulos, D. CYP2C19\*2 and other genetic variants affecting platelet response to clopidogrel in patients undergoing percutaneous coronary intervention. *Thromb Res* **129**, 441-6 (2012).
- (133) Kim, I.S. *et al.* Interaction analysis between genetic polymorphisms and pharmacodynamic effect in patients treated with adjunctive cilostazol to dual antiplatelet therapy: results of the ACCEL-TRIPLE (Accelerated Platelet Inhibition by Triple Antiplatelet Therapy According to Gene Polymorphism) study. *Br J Clin Pharmacol* **73**, 629-40 (2012).
- (134) Oh, I.Y. *et al.* Association of cytochrome P450 2C19\*2 polymorphism with clopidogrel response variability and cardiovascular events in Koreans treated with drug-eluting stents. *Heart* **98**, 139-44 (2012).
- (135) Tang, X.F. *et al.* Effect of the CYP2C19\*2 and \*3 genotypes, ABCB1 C3435T and PON1 Q192R alleles on the pharmacodynamics and adverse clinical events of clopidogrel in Chinese people after percutaneous coronary intervention. *Eur J Clin Pharmacol*, (2012).
- (136) Wu, H. *et al.* Effects of CYP2C19 variant alleles on postclopidogrel platelet reactivity and clinical outcomes in an actual clinical setting in China. *Pharmacogenet Genomics* **22**, 887-90 (2012).
- (137) Zou, J.J. *et al.* Influence of CYP2C19 loss-of-function variants on the antiplatelet effects and cardiovascular events in clopidogrel-treated Chinese patients undergoing percutaneous coronary intervention. *Eur J Clin Pharmacol*, (2012).
- (138) Giusti, B. *et al.* Relation of cytochrome P450 2C19 loss-of-function polymorphism to occurrence of drug-eluting coronary stent thrombosis. *Am J Cardiol* **103**, 806-11 (2009).
- (139) Harmsze, A.M. *et al.* CYP2C19\*2 and CYP2C9\*3 alleles are associated with stent thrombosis: a case-control study. *Eur Heart J* **31**, 3046-53 (2010).



- (140) Malek, L.A. *et al.* Cytochrome P450 2C19 polymorphism, suboptimal reperfusion and all-cause mortality in patients with acute myocardial infarction. *Cardiology* **117**, 81-7 (2010).
- (141) Marcucci, R. *et al.* High on-treatment platelet reactivity by ADP and increased risk of MACE in good clopidogrel metabolizers. *Platelets* **23**, 586-93 (2012).
- (142) Teixeira, R. *et al.* CYP2C19\*2 and prognosis after an acute coronary syndrome: Insights from a Portuguese center. *Rev Port Cardiol* **31**, 265-73 (2012).
- (143) Lee, J.M. *et al.* Relation of genetic polymorphisms in the cytochrome P450 gene with clopidogrel resistance after drug-eluting stent implantation in Koreans. *Am J Cardiol* **104**, 46-51 (2009).
- (144) Frere, C., Cuisset, T., Gaborit, B., Alessi, M.C. & Hulot, J.S. The CYP2C19\*17 allele is associated with better platelet response to clopidogrel in patients admitted for non-ST acute coronary syndrome. *J Thromb Haemost* **7**, 1409-11 (2009).
- (145) Subraja, K. *et al.* Genetic polymorphisms of CYP2C19 influences the response to clopidogrel in ischemic heart disease patients in the South Indian Tamilian population. *Eur J Clin Pharmacol*, (2012).
- (146) Tiroch, K.A. *et al.* Protective effect of the CYP2C19 \*17 polymorphism with increased activation of clopidogrel on cardiovascular events. *Am Heart J* **160**, 506-12 (2010).
- (147) Sorich, M.J., Vitry, A., Ward, M.B., Horowitz, J.D. & McKinnon, R.A. Prasugrel vs. clopidogrel for cytochrome P450 2C19-genotyped subgroups: integration of the TRITON-TIMI 38 trial data. *J Thromb Haemost* **8**, 1678-84 (2010).
- (148) Jin, B., Ni, H.C., Shen, W., Li, J., Shi, H.M. & Li, Y. Cytochrome P450 2C19 polymorphism is associated with poor clinical outcomes in coronary artery disease patients treated with clopidogrel. *Mol Biol Rep* **38**, 1697-702 (2011).
- (149) Zabalza, M. *et al.* Meta-analyses of the association between cytochrome CYP2C19 loss- and gain-of-function polymorphisms and cardiovascular outcomes in patients with coronary artery disease treated with clopidogrel. *Heart* **98**, 100-8 (2012).
- (150) Bauer, T., Bouman, H.J., van Werkum, J.W., Ford, N.F., ten Berg, J.M. & Taubert, D. Impact of CYP2C19 variant genotypes on clinical efficacy of antiplatelet treatment with clopidogrel: systematic review and meta-analysis. *BMJ* **343**, d4588 (2011).
- (151) Jang, J.S. *et al.* Meta-analysis of cytochrome P450 2C19 polymorphism and risk of adverse clinical outcomes among coronary artery disease patients of different ethnic groups treated with clopidogrel. *Am J Cardiol* **110**, 502-8 (2012).
- (152) Yamaguchi, Y., Abe, T., Sato, Y., Matsubara, Y., Moriki, T. & Murata, M. Effects of VerifyNow P2Y12 test and CYP2C19\*2 testing on clinical outcomes of patients with cardiovascular disease: A systematic review and meta-analysis. *Platelets*, (2012).
- (153) Singh, M. *et al.* CYP2C19\*2/ABCB1-C3435T polymorphism and risk of cardiovascular events in coronary artery disease patients on clopidogrel: Is clinical testing helpful? *Indian Heart J* **64**, 341-52 (2012).
- (154) Gladding, P. *et al.* The pharmacogenetics and pharmacodynamics of clopidogrel response: an analysis from the PRINC (Plavix Response in Coronary Intervention) trial. *JACC Cardiovasc Interv* **1**, 620-7 (2008).
- (155) Barker, C.M., Murray, S.S., Teirstein, P.S., Kandzari, D.E., Topol, E.J. & Price, M.J. Pilot study of the antiplatelet effect of increased clopidogrel maintenance dosing and its relationship to CYP2C19 genotype in patients with high on-treatment reactivity. *JACC Cardiovasc Interv* **3**, 1001-7 (2010).

- (156) Bonello, L. *et al.* Clopidogrel Loading Dose Adjustment According to Platelet Reactivity Monitoring in Patients Carrying the 2C19\*2 Loss of Function Polymorphism. *J Am Coll Cardiol* **56**, 1630-6 (2010).
- (157) Alexopoulos, D. *et al.* Antiplatelet effects of prasugrel vs. double clopidogrel in patients on hemodialysis and with high on-treatment platelet reactivity. *J Thromb Haemost* **9**, 2379-85 (2011).
- (158) Mega, J.L. *et al.* Dosing clopidogrel based on CYP2C19 genotype and the effect on platelet reactivity in patients with stable cardiovascular disease. *JAMA* **306**, 2221-8 (2011).
- (159) Price, M.J. *et al.* Standard- vs high-dose clopidogrel based on platelet function testing after percutaneous coronary intervention: the GRAVITAS randomized trial. *JAMA* **305**, 1097-105 (2011).
- (160) Collet, J.P. *et al.* Bedside monitoring to adjust antiplatelet therapy for coronary stenting. *N Engl J Med* **367**, 2100-9 (2012).
- (161) Sangkuhl, K., Klein, T.E. & Altman, R.B. Clopidogrel pathway. *Pharmacogenet Genomics* **20**, 463-5 (2010).

**Supplemental Figure S1.** Hepatic metabolism of clopidogrel (161). For a detailed and updated description, see: <http://www.pharmgkb.org/do/serve?objId=PA154424674&objCls=Pathway>. Reproduced with permission by PharmGKB and Stanford University.

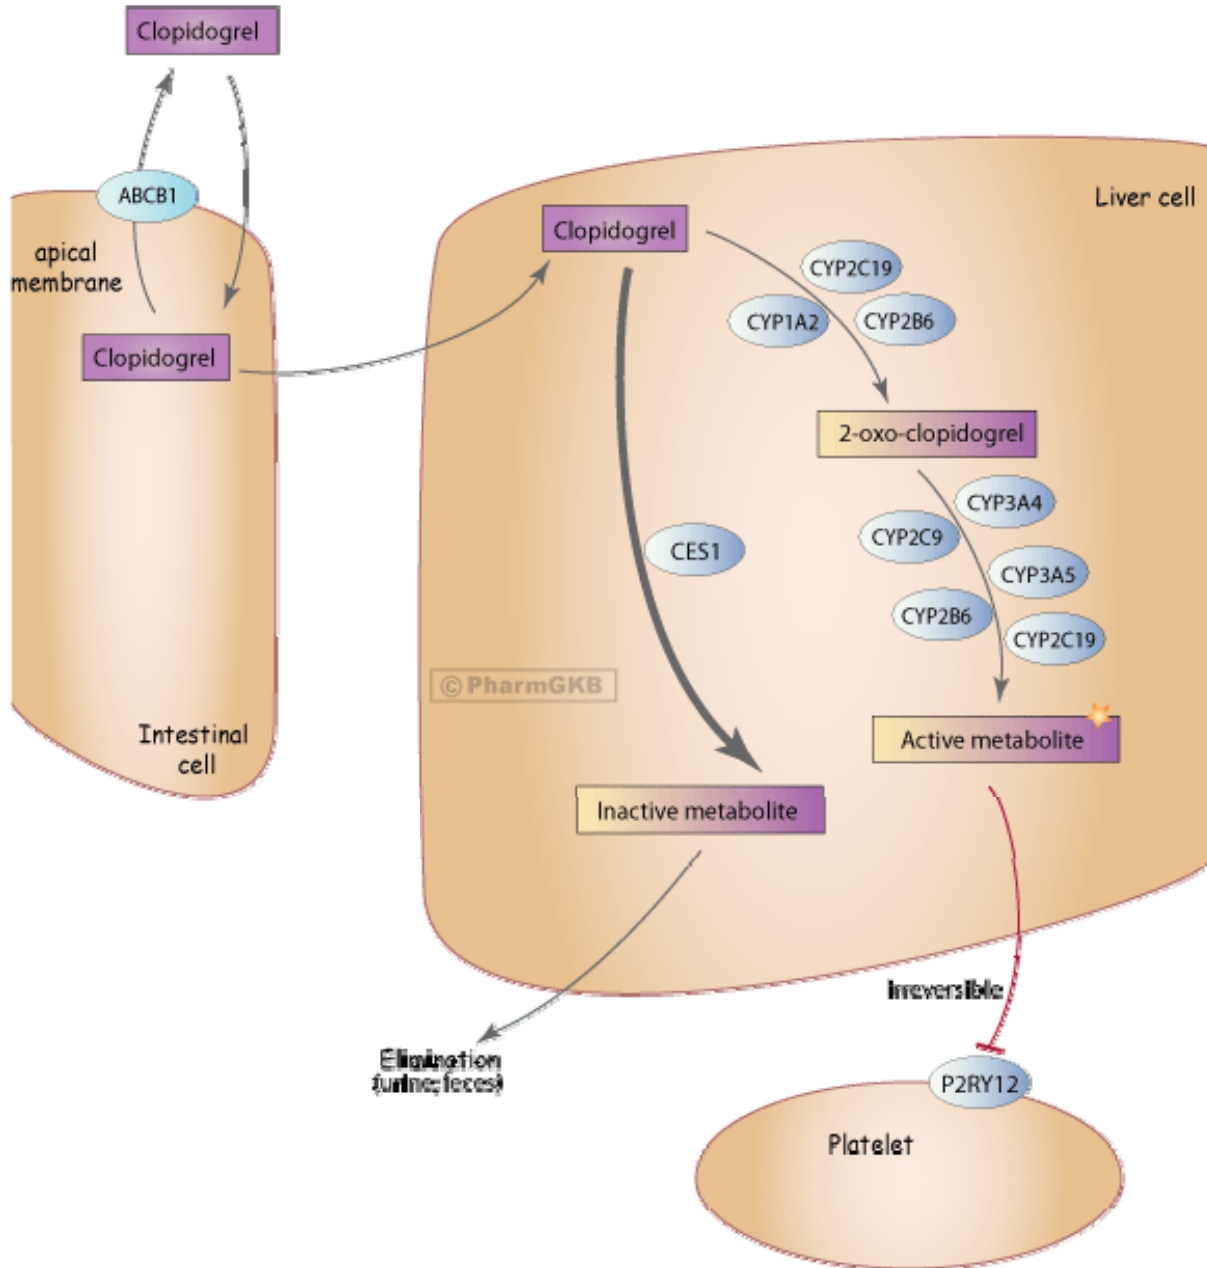

Supplement: clpt2013105x10.pdf [file clpt2013105x10.pdf]
