# Supplementary material
Source: PubMed Central journal article supplement (PMC3748366)

**Supplemental Figure S1.** Hepatic metabolism of clopidogrel (161). For a detailed and updated description, see: <http://www.pharmgkb.org/do/serve?objId=PA154424674&objCls=Pathway>. Reproduced with permission by PharmGKB and Stanford University.

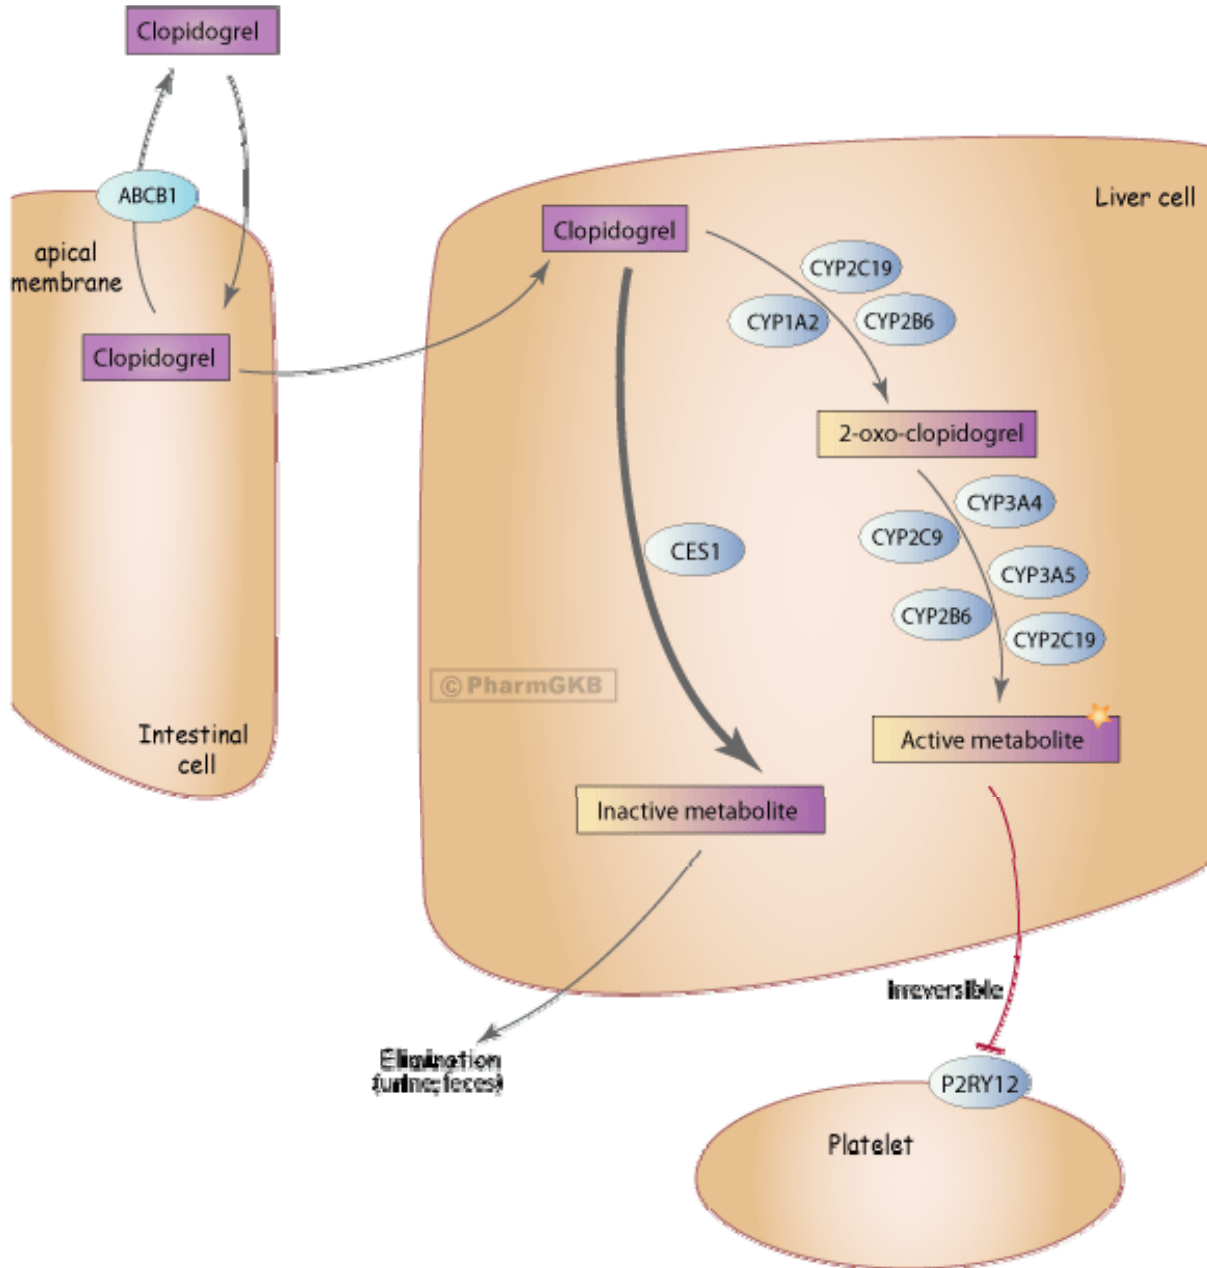

Supplement: clpt2013105x1.pdf [file clpt2013105x1.pdf]
