# Supplementary material
Source: PubMed Central journal article supplement (PMC3748366)
Supplement: clpt2013105x2.pdf [file clpt2013105x2.pdf]

**Supplemental Table S1. Commonly tested *CYP2C19* variant alleles and their effect on *CYP2C19* protein**

| Allele <sup>1</sup>     | Major Variation | Nucleotide | dbSNP Number <sup>2</sup> | Effect on <i>CYP2C19</i> Protein |
|-------------------------|-----------------|------------|---------------------------|----------------------------------|
| <i>*1</i>               | -               |            | -                         | -                                |
| <i>*2</i>               | c.681G>A        |            | rs4244285                 | Splicing defect                  |
| <i>*3</i>               | c.636G>A        |            | rs4986893                 | W212X                            |
| <i>*4</i> <sup>3</sup>  | c.1A>G          |            | rs28399504                | M1V                              |
| <i>*5</i>               | c.1297C>T       |            | rs56337013                | R433W                            |
| <i>*6</i>               | c.395G>A        |            | rs72552267                | R132Q                            |
| <i>*7</i>               | c.819+2T>A      |            | rs72558186                | Splicing defect                  |
| <i>*8</i>               | c.358T>C        |            | rs41291556                | W120R                            |
| <i>*17</i> <sup>4</sup> | c.-806C>T       |            | rs12248560                | Increased expression             |

<sup>1</sup> See Human Cytochrome P450 Allele Nomenclature Committee (<http://www.cypalleles.ki.se>) for comprehensive haplotype definitions of *CYP2C19* variant alleles and updated allele information.

<sup>2</sup> RefSNP accession ID number (<http://www.ncbi.nlm.nih.gov/snp/>).

<sup>3</sup> Of note, the *CYP2C19*\*4 loss-of-function allele has been identified in linkage disequilibrium with *\*17* (c.-806C>T) in certain ethnic subpopulations and this haplotype is designated *CYP2C19*\*4B (38).

<sup>4</sup> There is linkage disequilibrium between c.681G and c.-806T (e.g.,  $|D'|=1.0$  and  $r^2=0.064$  in CEU HapMap sample;  $|D'|=1.0$  and  $r^2=0.065$  in YRI HapMap sample; and  $|D'|=1.0$  and  $r^2=0.074$  in CHB HapMap sample). This means that the less common *\*17* variant (c.-806T) always tracks on the same allele with the more common c.681G. This complicates any interpretation of whether these two variants act independently of one another, and published articles argue both for (29, 35) and against (15, 36, 37) this point.
