# Supplementary material
Source: PubMed Central journal article supplement (PMC3748366)
Supplement: clpt2013105x3.pdf [file clpt2013105x3.pdf]

**Supplemental Table S2. Association between *CYP2C19* allelic variants and enzyme activity**

| <b>Functional Status</b>                              | <b>Alleles</b>             | <b>References</b> |
|-------------------------------------------------------|----------------------------|-------------------|
| Functional / normal activity / wild-type <sup>1</sup> | *1                         | (95)              |
| Loss-of-function / no or decreased activity           | *2, *3, *4, *5, *6, *7, *8 | (96-102)          |
| Increased function / increased activity               | *17                        | (103-105)         |

<sup>1</sup> An important caveat for all genotyping tests is that the “wild-type” (\*1) status is reported if all other alleles that are measured are absent. Some genotype tests do not interrogate the rare loss-of-function alleles and therefore, if present, would be erroneously reported as “wild-type”. It is also possible that a novel un-interrogated *CYP2C19* sequence variant may confer altered enzyme function in an individual, and thus lead to the possibility of a loss-of-function allele being erroneously called as “wild-type” (\*1).
