# Supplementary material
Source: PubMed Central journal article supplement (PMC3748366)
Supplement: clpt2013105x4.pdf [file clpt2013105x4.pdf]

**Supplemental Table S3. Frequencies<sup>1</sup> of *CYP2C19* alleles in major race/ethnic groups<sup>2</sup>**

| Allele                 | African | American | East Asian | European | Middle Eastern | Oceanian | South/Central Asian |
|------------------------|---------|----------|------------|----------|----------------|----------|---------------------|
| <i>*1</i> <sup>3</sup> | 0.68    | 0.69     | 0.60       | 0.63     | 0.87           | 0.24     | 0.62                |
| <i>*2</i>              | 0.15    | 0.12     | 0.29       | 0.15     | 0.12           | 0.61     | 0.35                |
| <i>*3</i>              | 0.0052  | 0.00028  | 0.089      | 0.0042   | 0.011          | 0.15     | 0.024               |
| <i>*4</i>              | 0.00093 | 0.0024   | 0.00049    | 0.0025   | ND             | ND       | 0.00                |
| <i>*5</i>              | ND      | 0.00     | 0.00062    | 0.000073 | ND             | ND       | 0.00                |
| <i>*6</i>              | 0.00    | 0.00     | 0.00       | 0.00017  | ND             | ND       | 0.00                |
| <i>*7</i>              | ND      | ND       | ND         | 0.00     | ND             | ND       | ND                  |
| <i>*8</i>              | 0.00    | 0.0012   | 0.00       | 0.0035   | ND             | ND       | ND                  |
| <i>*17</i>             | 0.16    | 0.18     | 0.027      | 0.21     | ND             | ND       | ND                  |

ND: not determined.

<sup>1</sup> Average frequencies are based on actual numbers of subjects with each allele reported in multiple studies. See **Supplemental Table S4** for details and references.

<sup>2</sup> Worldwide race/ethnic designations correspond to the Human Genome Diversity Project-Centre Etude Polymorphisme Humain (HGDP-CEPH) (21, 22) as indicated in **Supplemental Table S4**.

<sup>3</sup> Note that because *CYP2C19\*1* is not genotyped directly, its inferred frequency is calculated as: 1 - (sum of variant allele frequencies).
