# Supplementary material
Source: PubMed Central journal article supplement (PMC3748366)
Supplement: clpt2013105x5.pdf [file clpt2013105x5.pdf]

Supplemental Table S4. *CYP2C19* minor allele frequencies

| HGDP-CEPH Grouping <sup>1</sup> | Ethnicity              | PMID <sup>2</sup> | CYP2C19 minor allele frequency (%) <sup>3</sup> |     |     |     |    |    |     |                  | Total Individuals | Total Alleles | CYP2C19 minor alleles reported <sup>3</sup> |    |    |    |    |    |    |                  |  |
|---------------------------------|------------------------|-------------------|-------------------------------------------------|-----|-----|-----|----|----|-----|------------------|-------------------|---------------|---------------------------------------------|----|----|----|----|----|----|------------------|--|
|                                 |                        |                   | *2                                              | *3  | *4  | *5  | *6 | *7 | *8  | *17 <sup>4</sup> |                   |               | *2                                          | *3 | *4 | *5 | *6 | *7 | *8 | *17 <sup>4</sup> |  |
| Africa                          | African                | 20173083          | 19.2                                            | 0.2 | 0   | -   | 0  | -  | 0   | -                | 250               | 500           | 96                                          | 1  | 0  | -  | 0  | -  | 0  | -                |  |
| Africa                          | African American       | 16815315          | 18.2                                            | 0.8 | -   | -   | -  | -  | -   | -                | 236               | 472           | 86                                          | 4  | -  | -  | -  | -  | -  | -                |  |
| Africa                          | African-American       | 9110363           | 25                                              | 0   | -   | -   | -  | -  | -   | -                | 108               | 216           | 54                                          | 0  | -  | -  | -  | -  | -  | -                |  |
| Africa                          | African-American       | 19169185          | 18.3                                            | 0.1 | -   | -   | -  | -  | -   | -                | 441               | 882           | 161                                         | 1  | -  | -  | -  | -  | -  | -                |  |
| Africa                          | African-American       | 8873222           | 19.1                                            | -   | -   | -   | -  | -  | -   | -                | 76                | 152           | 29                                          | -  | -  | -  | -  | -  | -  | -                |  |
| Africa                          | African-American       | 8823231           | 16.0                                            | -   | -   | -   | -  | -  | -   | -                | 100               | 200           | 32                                          | -  | -  | -  | -  | -  | -  | -                |  |
| Africa                          | Beninese               | 14616425          | 13                                              | -   | -   | -   | -  | -  | -   | -                | 111               | 222           | 29                                          | -  | -  | -  | -  | -  | -  | -                |  |
| Africa                          | Black                  | 21247447          | 19.9                                            | 0   | -   | -   | 0  | -  | 0   | -                | 289               | 578           | 115                                         | 0  | 1  | -  | 0  | -  | 0  | 120              |  |
| Africa                          | Cape Mixed Ancestry    | 20712527          | 17                                              | 7   | -   | -   | -  | -  | -   | 14               | 75                | 150           | 26                                          | 11 | -  | -  | -  | -  | -  | 21               |  |
| Africa                          | Egyptian               | 12047484          | 10.9                                            | 0.2 | -   | -   | -  | -  | -   | -                | 247               | 494           | 54                                          | 1  | -  | -  | -  | -  | -  | -                |  |
| Africa                          | Ethiopian              | 9014201           | 14                                              | 2   | -   | -   | -  | -  | -   | -                | 114               | 228           | 32                                          | 5  | -  | -  | -  | -  | -  | -                |  |
| Africa                          | Ethiopian              | 12142727          | 12.1                                            | 2.9 | -   | -   | -  | -  | -   | -                | 70                | 140           | 17                                          | 4  | -  | -  | -  | -  | -  | -                |  |
| Africa                          | Ethiopian              | 16413245          | -                                               | -   | -   | -   | -  | -  | -   | 13.2             | 190               | 380           | -                                           | -  | -  | -  | -  | -  | -  | 50               |  |
| Africa                          | Ghanaian               | 19954515          | 5.9                                             | 0   | -   | -   | -  | -  | -   | -                | 169               | 338           | 20                                          | 0  | -  | -  | -  | -  | -  | -                |  |
| Africa                          | Nigerian               | 20831548          | 15.5                                            | 0   | -   | -   | -  | -  | -   | -                | 158               | 316           | 49                                          | 0  | -  | -  | -  | -  | -  | -                |  |
| Africa                          | South African (Venda)  | 11372584          | 21.7                                            | 0   | -   | -   | -  | -  | -   | -                | 76                | 152           | 33                                          | 0  | -  | -  | -  | -  | -  | -                |  |
| Africa                          | Tanzanian              | 10510152          | 10                                              | 0   | -   | -   | -  | -  | -   | -                | 195               | 390           | 39                                          | 0  | -  | -  | -  | -  | -  | -                |  |
| Africa                          | Tanzanian              | 9797796           | 17.9                                            | 0.6 | -   | -   | -  | -  | -   | -                | 251               | 502           | 90                                          | 3  | -  | -  | -  | -  | -  | -                |  |
| Africa                          | Tanzanian              | 11372584          | 18.0                                            | 0.3 | -   | -   | -  | -  | -   | -                | 192               | 384           | 69                                          | 1  | -  | -  | -  | -  | -  | -                |  |
| Africa                          | Tunisian               | 18423013          | 10.5                                            | -   | -   | -   | -  | -  | -   | -                | 544               | 1088          | 114                                         | -  | -  | -  | -  | -  | -  | -                |  |
| Africa                          | Ugandan                | 19002442          | 12.6                                            | 1.0 | -   | -   | -  | -  | -   | 17.2             | 99                | 198           | 25                                          | 2  | -  | -  | -  | -  | -  | 34               |  |
| Africa                          | Xhosa                  | 20712527          | 21                                              | 0   | -   | -   | -  | -  | -   | 10               | 100               | 200           | 42                                          | 0  | -  | -  | -  | -  | -  | 20               |  |
| Africa                          | Zimbabwean Shona       | 7781265           | 4.2                                             | -   | -   | -   | -  | -  | -   | -                | 84                | 168           | 7                                           | -  | -  | -  | -  | -  | -  | -                |  |
|                                 |                        |                   |                                                 |     |     |     |    |    |     |                  |                   |               |                                             |    |    |    |    |    |    |                  |  |
| Americas                        | Bolivian               | 15776277          | 7.8                                             | 0.1 | -   | -   | -  | -  | -   | -                | 778               | 1556          | 121                                         | 1  | -  | -  | -  | -  | -  | -                |  |
| Americas                        | Brazilian (mixed)      | 21247447          | 16.1                                            | 0   | 0.3 | 0   | -  | -  | -   | 19.2             | 1212              | 2424          | 390                                         | 0  | 7  | 0  | -  | -  | -  | 466              |  |
| Americas                        | Brazilian (mixed)      | 21173785          | 13.2                                            | -   | -   | -   | -  | -  | -   | -                | 1034              | 2068          | 273                                         | 1  | -  | -  | -  | -  | -  | 358              |  |
| Americas                        | Columbian Mestizo      | 17623107          | 8.7                                             | 0   | 0   | 0   | 0  | -  | 0   | -                | 189               | 378           | 33                                          | 0  | 0  | 0  | 0  | -  | 0  | -                |  |
| Americas                        | Mexican Americans      | 16815315          | 9.7                                             | 0.1 | -   | -   | -  | -  | -   | -                | 346               | 692           | 67                                          | -  | -  | -  | -  | -  | -  | -                |  |
| Americas                        | Native Canadian Indian | 9797794           | 8.8                                             | 0   | -   | -   | -  | -  | -   | -                | 159               | 318           | 28                                          | 0  | -  | -  | -  | -  | -  | -                |  |
| Americas                        | White Hispanic         | 21247447          | 12.6                                            | 0   | 0.2 | -   | 0  | -  | 0.2 | 14.0             | 242               | 484           | 61                                          | 0  | 1  | -  | 0  | -  | 1  | 68               |  |
|                                 |                        |                   |                                                 |     |     |     |    |    |     |                  |                   |               |                                             |    |    |    |    |    |    |                  |  |
| East Asia                       | Bai Chinese            | 9103550           | 25.7                                            | 5.2 | -   | 0.3 | -  | -  | -   | -                | 202               | 404           | 104                                         | 21 | -  | 1  | -  | -  | -  | -                |  |

|           |             |          |             |             |            |          |            |   |          |            |     |      |            |           |   |   |   |   |   |          |
|-----------|-------------|----------|-------------|-------------|------------|----------|------------|---|----------|------------|-----|------|------------|-----------|---|---|---|---|---|----------|
| East Asia | Burmese     | 16946555 | <b>30</b>   | <b>4</b>    | -          | -        | -          | - | -        | -          | 127 | 254  | 76         | 10        | - | - | - | - | - | -        |
| East Asia | Chinese     | 15327595 | 23.1        | 4.6         | -          | -        | -          | - | -        | -          | 54  | 108  | <b>25</b>  | <b>5</b>  | - | - | - | - | - | -        |
| East Asia | Chinese     | 18231117 | <b>29.7</b> | <b>3.5</b>  | <b>0</b>   | <b>0</b> | -          | - | -        | <b>0.5</b> | 101 | 202  | 60         | 7         | 0 | 0 | - | - | - | 1        |
| East Asia | Chinese     | 19636337 | <b>25.5</b> | <b>2</b>    | <b>0.5</b> | -        | -          | - | -        | <b>3</b>   | 100 | 200  | 51         | 4         | 4 | - | - | - | - | 6        |
| East Asia | Chinese     | 20173083 | <b>30.7</b> | <b>4.5</b>  | <b>0</b>   | -        | <b>0</b>   | - | <b>0</b> | -          | 398 | 796  | 244        | 36        | 0 | - | 0 | - | 0 | -        |
| East Asia | Chinese     | 16855453 | 30.2        | 6.6         | -          | -        | -          | - | -        | -          | 53  | 106  | <b>32</b>  | <b>7</b>  | - | - | - | - | - | -        |
| East Asia | Chinese     | 17450472 | 29.7        | 5.9         | -          | -        | -          | - | -        | -          | 59  | 118  | <b>35</b>  | <b>7</b>  | - | - | - | - | - | -        |
| East Asia | Chinese     | 11686476 | 44.2        | 4.5         | -          | -        | -          | - | -        | -          | 121 | 242  | <b>107</b> | <b>11</b> | - | - | - | - | - | -        |
| East Asia | Chinese     | 19745563 | 24.8        | 7.0         | -          | -        | -          | - | -        | -          | 107 | 214  | <b>53</b>  | <b>15</b> | - | - | - | - | - | -        |
| East Asia | Chinese     | 20831535 | 30.6        | 3.7         | -          | -        | -          | - | -        | -          | 204 | 408  | <b>125</b> | <b>15</b> | - | - | - | - | - | -        |
| East Asia | Chinese     | 19756559 | 30.7        | 7.1         | -          | -        | -          | - | -        | -          | 287 | 574  | <b>176</b> | <b>41</b> | - | - | - | - | - | -        |
| East Asia | Chinese     | 21163112 | 23.1        | -           | -          | -        | -          | - | -        | -          | 722 | 1444 | <b>334</b> | -         | - | - | - | - | - | -        |
| East Asia | Chinese     | 15301728 | <b>35</b>   | <b>7</b>    | -          | -        | -          | - | -        | -          | 70  | 140  | 49         | 10        | - | - | - | - | - | -        |
| East Asia | Dai Chinese | 11956668 | <b>30.3</b> | <b>3.4</b>  | -          | -        | -          | - | -        | -          | 386 | 772  | 234        | 26        | - | - | - | - | - | -        |
| East Asia | East Asian  | 20173083 | <b>32.4</b> | <b>8</b>    | <b>0</b>   | -        | <b>0</b>   | - | <b>0</b> | -          | 246 | 492  | 159        | 39        | 0 | - | 0 | - | 0 | -        |
| East Asia | East Asian  | 16815315 | <b>28.9</b> | <b>9.6</b>  | -          | -        | -          | - | -        | -          | 161 | 322  | 93         | 31        | - | - | - | - | - | -        |
| East Asia | Han Chinese | 18518848 | <b>24.7</b> | <b>3.3</b>  | -          | -        | -          | - | -        | <b>1.6</b> | 400 | 800  | 198        | 26        | - | - | - | - | - | 13       |
| East Asia | Han Chinese | 19444287 | 29.1        | 7.3         | -          | -        | -          | - | -        | -          | 103 | 206  | <b>60</b>  | <b>15</b> | - | - | - | - | - | -        |
| East Asia | Han Chinese | 15612662 | 34.1        | 8.2         | -          | -        | -          | - | -        | -          | 104 | 208  | <b>71</b>  | <b>17</b> | - | - | - | - | - | -        |
| East Asia | Han Chinese | 9103550  | <b>36.6</b> | <b>7.4</b>  | -          | -        | -          | - | -        | -          | 101 | 202  | 74         | 15        | - | - | - | - | - | -        |
| East Asia | Han Chinese | 10585366 | <b>30.7</b> | <b>3.8</b>  | <b>0.4</b> | <b>0</b> | -          | - | -        | -          | 119 | 238  | 73         | 9         | 9 | 0 | - | - | - | -        |
| East Asia | Japanese    | 19881258 | 14.5        | 8.2         | -          | -        | -          | - | -        | -          | 55  | 110  | <b>16</b>  | <b>9</b>  | - | - | - | - | - | -        |
| East Asia | Japanese    | 20173083 | <b>30.3</b> | <b>13.1</b> | <b>0</b>   | -        | <b>0.1</b> | - | <b>0</b> | -          | 500 | 1000 | 303        | 131       | 0 | - | - | - | 0 | -        |
| East Asia | Japanese    | 16141610 | 26.7        | 12.8        | -          | -        | -          | - | -        | -          | 253 | 506  | <b>135</b> | <b>65</b> | - | - | - | - | - | <b>4</b> |
| East Asia | Japanese    | 9867757  | 28.2        | 6.5         | -          | -        | -          | - | -        | -          | 62  | 124  | <b>35</b>  | <b>8</b>  | - | - | - | - | - | -        |
| East Asia | Japanese    | 16595916 | 28.7        | 8.3         | -          | -        | -          | - | -        | -          | 54  | 108  | <b>31</b>  | <b>9</b>  | - | - | - | - | - | -        |
| East Asia | Japanese    | 20528170 | 32.4        | 10.8        | -          | -        | -          | - | -        | -          | 51  | 102  | <b>33</b>  | <b>11</b> | - | - | - | - | - | -        |
| East Asia | Japanese    | 16338280 | 34.1        | 11.1        | -          | -        | -          | - | -        | -          | 63  | 126  | <b>43</b>  | <b>14</b> | - | - | - | - | - | -        |
| East Asia | Japanese    | 10579481 | 25.5        | 6.5         | -          | -        | -          | - | -        | -          | 108 | 216  | <b>55</b>  | <b>14</b> | - | - | - | - | - | -        |
| East Asia | Japanese    | 12386647 | 30.0        | 11.5        | -          | -        | -          | - | -        | -          | 65  | 130  | <b>39</b>  | <b>15</b> | - | - | - | - | - | -        |
| East Asia | Japanese    | 11477314 | 29.4        | 11.3        | -          | -        | -          | - | -        | -          | 80  | 160  | <b>47</b>  | <b>18</b> | - | - | - | - | - | -        |
| East Asia | Japanese    | 19259653 | 24.6        | 9.3         | -          | -        | -          | - | -        | -          | 124 | 248  | <b>61</b>  | <b>23</b> | - | - | - | - | - | -        |
| East Asia | Japanese    | 17377957 | 20.5        | 17.1        | -          | -        | -          | - | -        | -          | 73  | 146  | <b>30</b>  | <b>25</b> | - | - | - | - | - | -        |
| East Asia | Japanese    | 11434512 | 28.2        | 12.9        | -          | -        | -          | - | -        | -          | 101 | 202  | <b>57</b>  | <b>26</b> | - | - | - | - | - | -        |
| East Asia | Japanese    | 11686476 | 26.0        | 14.6        | -          | -        | -          | - | -        | -          | 96  | 192  | <b>50</b>  | <b>28</b> | - | - | - | - | - | -        |
| East Asia | Japanese    | 9860067  | 24.6        | 10.4        | -          | -        | -          | - | -        | -          | 134 | 268  | <b>66</b>  | <b>28</b> | - | - | - | - | - | -        |
| East Asia | Japanese    | 15952098 | 31.6        | 11.3        | -          | -        | -          | - | -        | -          | 141 | 282  | <b>89</b>  | <b>32</b> | - | - | - | - | - | -        |
| East Asia | Japanese    | 15710002 | 24.0        | 11.0        | -          | -        | -          | - | -        | -          | 173 | 346  | <b>83</b>  | <b>38</b> | - | - | - | - | - | -        |

|           |                              |          |      |      |   |   |   |   |   |     |     |     |     |     |   |   |   |   |   |    |
|-----------|------------------------------|----------|------|------|---|---|---|---|---|-----|-----|-----|-----|-----|---|---|---|---|---|----|
| East Asia | Japanese                     | 9511186  | 23.4 | 11.1 | - | - | - | - | - | -   | 175 | 350 | 82  | 39  | - | - | - | - | - | -  |
| East Asia | Japanese                     | 21168310 | 30.8 | 10.0 | - | - | - | - | - | -   | 201 | 402 | 124 | 40  | - | - | - | - | - | -  |
| East Asia | Japanese                     | 8988068  | 28.8 | 12.4 | - | - | - | - | - | -   | 186 | 372 | 107 | 46  | - | - | - | - | - | -  |
| East Asia | Japanese                     | 14568772 | 27.3 | 12.0 | - | - | - | - | - | -   | 196 | 392 | 107 | 47  | - | - | - | - | - | -  |
| East Asia | Japanese                     | 19156902 | 31.7 | 13.5 | - | - | - | - | - | -   | 178 | 356 | 113 | 48  | - | - | - | - | - | -  |
| East Asia | Japanese                     | 16307177 | 29.6 | 12.8 | - | - | - | - | - | -   | 203 | 406 | 120 | 52  | - | - | - | - | - | -  |
| East Asia | Japanese                     | 11240980 | 31.0 | 10.9 | - | - | - | - | - | -   | 261 | 522 | 162 | 57  | - | - | - | - | - | -  |
| East Asia | Japanese                     | 17215846 | 27.8 | 12.3 | - | - | - | - | - | -   | 300 | 600 | 167 | 74  | - | - | - | - | - | -  |
| East Asia | Japanese                     | 15017629 | 28.7 | 11.6 | - | - | - | - | - | -   | 350 | 700 | 201 | 81  | - | - | - | - | - | -  |
| East Asia | Japanese                     | 17357148 | 27.7 | 14.3 | - | - | - | - | - | -   | 352 | 704 | 195 | 101 | - | - | - | - | - | -  |
| East Asia | Japanese                     | 16268979 | 27.6 | 13.1 | - | - | - | - | - | -   | 426 | 852 | 235 | 112 | - | - | - | - | - | -  |
| East Asia | Japanese                     | 17052843 | 31.1 | 14.6 | - | - | - | - | - | -   | 487 | 974 | 303 | 142 | - | - | - | - | - | -  |
| East Asia | Japanese                     | 16338278 | 15.4 | -    | - | - | - | - | - | -   | 205 | 410 | 63  | -   | - | - | - | - | - | -  |
| East Asia | Japanese                     | 21102498 | 28.4 | -    | - | - | - | - | - | -   | 58  | 116 | 33  | -   | - | - | - | - | - | -  |
| East Asia | Japanese                     | 9110363  | 23   | 10.4 | - | - | - | - | - | -   | 53  | 106 | 24  | 11  | - | - | - | - | - | -  |
| East Asia | Japanese                     | 8807668  | 27.4 | 10.8 | - | - | - | - | - | -   | 217 | 434 | 119 | 47  | - | - | - | - | - | -  |
| East Asia | Japanese                     | 9631918  | 35   | 11   | - | - | - | - | - | -   | 140 | 280 | 98  | 31  | - | - | - | - | - | -  |
| East Asia | Japanese                     | 8890945  | 21.9 | 11.7 | - | - | - | - | - | -   | 233 | 466 | 102 | 55  | - | - | - | - | - | -  |
| East Asia | Japanese                     | 17502835 | 31.1 | 12.6 | - | - | - | - | - | -   | 103 | 206 | 64  | 26  | - | - | - | - | - | -  |
| East Asia | Japanese                     | 11763000 | 27.5 | 12.8 | - | - | - | - | - | -   | 51  | 102 | 28  | 13  | - | - | - | - | - | -  |
| East Asia | Japanese                     | 19696793 | 26   | 13   | - | - | - | - | - | -   | 219 | 438 | 114 | 57  | - | - | - | - | - | -  |
| East Asia | Japanese                     | 15691505 | 32.7 | 13.7 | - | - | - | - | - | -   | 139 | 278 | 91  | 38  | - | - | - | - | - | -  |
| East Asia | Japanese                     | 19696793 | 31   | 18   | - | - | - | - | - | -   | 184 | 368 | 114 | 66  | - | - | - | - | - | -  |
| East Asia | Japanese                     | 18241287 | -    | -    | - | - | - | - | - | 1.3 | 265 | 530 | -   | -   | - | - | - | - | - | 7  |
| East Asia | Japanese (1st generation)    | 18231117 | 26.2 | 10   | 0 | 0 | - | - | - | 1   | 105 | 210 | 55  | 21  | 0 | 0 | - | - | - | 2  |
| East Asia | Japanese (3rd generation)    | 18231117 | 33.1 | 13.3 | 0 | 0 | - | - | - | 1.2 | 84  | 168 | 56  | 22  | 0 | 0 | - | - | - | 2  |
| East Asia | Japanese (native)            | 18231117 | 34.5 | 9    | 0 | 0 | - | - | - | 0.5 | 100 | 200 | 69  | 18  | 0 | 0 | - | - | - | 1  |
| East Asia | Japanese (mixed descendents) | 19882083 | 25.9 | 11.9 | - | - | - | - | - | -   | 139 | 278 | 72  | 33  | - | - | - | - | - | -  |
| East Asia | Karen                        | 16946555 | 28   | 1    | - | - | - | - | - | -   | 131 | 262 | 73  | -   | - | - | - | - | - | -  |
| East Asia | Kazakh Chinese               | 19444287 | 15.4 | 7.9  | - | - | - | - | - | -   | 107 | 214 | 33  | 17  | - | - | - | - | - | -  |
| East Asia | Korean                       | 18231117 | 25   | 8    | 0 | 0 | - | - | - | 1.5 | 100 | 200 | 50  | 16  | 0 | 0 | - | - | - | 3  |
| East Asia | Korean                       | 20499227 | 16   | -    | - | - | - | - | - | 20  | 150 | 300 | 48  | -   | - | - | - | - | - | 60 |
| East Asia | Korean                       | 20173083 | 28.6 | 7.4  | 0 | - | 0 | - | 0 | -   | 200 | 400 | 114 | 30  | 0 | - | 0 | - | 0 | -  |
| East Asia | Korean                       | 17424941 | 31.1 | 7.6  | - | - | - | - | - | -   | 66  | 132 | 41  | 10  | - | - | - | - | - | -  |
| East Asia | Korean                       | 19220726 | 34.9 | 6.6  | - | - | - | - | - | -   | 136 | 272 | 95  | 18  | - | - | - | - | - | -  |
| East Asia | Korean                       | 17562299 | 21.1 | 9.8  | - | - | - | - | - | -   | 97  | 194 | 41  | 19  | - | - | - | - | - | -  |
| East Asia | Korean                       | 20650435 | 31.0 | 8.7  | - | - | - | - | - | -   | 126 | 252 | 78  | 22  | - | - | - | - | - | -  |
| East Asia | Korean                       | 20724801 | 31.3 | 6.5  | - | - | - | - | - | -   | 176 | 352 | 110 | 23  | - | - | - | - | - | -  |

|           |                   |          |      |      |     |   |     |   |     |      |      |      |     |    |   |   |   |   |     |
|-----------|-------------------|----------|------|------|-----|---|-----|---|-----|------|------|------|-----|----|---|---|---|---|-----|
| East Asia | Korean            | 9014204  | 20.9 | 11.7 | -   | - | -   | - | -   | -    | 103  | 206  | 43  | 24 | - | - | - | - | -   |
| East Asia | Korean            | 14695703 | 26.7 | 10.3 | -   | - | -   | - | -   | -    | 116  | 232  | 62  | 24 | - | - | - | - | -   |
| East Asia | Korean            | 20823393 | 34.0 | 9.7  | -   | - | -   | - | -   | -    | 134  | 268  | 91  | 26 | - | - | - | - | -   |
| East Asia | Korean            | 21075428 | 30.3 | 6.8  | -   | - | -   | - | -   | -    | 190  | 380  | 115 | 26 | - | - | - | - | -   |
| East Asia | Korean            | 19891553 | -    | 8.8  | -   | - | -   | - | -   | -    | 226  | 452  | -   | 40 | - | - | - | - | -   |
| East Asia | Korean            | 18637061 | 26.0 | 8.7  | -   | - | -   | - | -   | -    | 327  | 654  | 170 | 57 | - | - | - | - | -   |
| East Asia | Korean            | 17667801 | 28.2 | 7.6  | -   | - | -   | - | -   | -    | 377  | 754  | 213 | 57 | - | - | - | - | -   |
| East Asia | Korean            | 19576320 | 27.3 | 9.3  | -   | - | -   | - | -   | -    | 387  | 774  | 211 | 72 | - | - | - | - | -   |
| East Asia | Korean            | 20559522 | 29.9 | 9.5  | -   | - | -   | - | -   | -    | 463  | 926  | 277 | 88 | - | - | - | - | -   |
| East Asia | Korean            | 21054462 | 28.4 | 10.1 | -   | - | -   | - | -   | 1.5  | 271  | 542  | 154 | 55 | - | - | - | - | 8   |
| East Asia | Li Chinese        | 17439410 | 35.8 | 3.0  | -   | - | -   | - | -   | -    | 165  | 330  | 118 | 10 | - | - | - | - | -   |
| East Asia | Malay             | 15327595 | 30.9 | 10.3 | -   | - | -   | - | -   | -    | 68   | 136  | 42  | 14 | - | - | - | - | -   |
| East Asia | Mongolian Chinese | 20857895 | 24.3 | 4.3  | -   | - | -   | - | -   | -    | 280  | 560  | 136 | 24 | - | - | - | - | -   |
| East Asia | Northeastern Thai | 11927837 | 26.6 | 2.3  | -   | - | -   | - | -   | -    | 107  | 214  | 57  | 5  | - | - | - | - | -   |
| East Asia | Southeast Asian   | 16815315 | 31.2 | 5.7  | -   | - | -   | - | -   | -    | 80   | 160  | 50  | 9  | - | - | - | - | -   |
| East Asia | Taiwanese         | 20350136 | 32   | 2.5  | -   | - | -   | - | -   | 0.5  | 100  | 200  | 64  | 5  | - | - | - | - | 1   |
| East Asia | Taiwanese         | 16924387 | 32.2 | 5.0  | -   | - | -   | - | -   | -    | 180  | 360  | 116 | 18 | - | - | - | - | -   |
| East Asia | Taiwanese         | 20457439 | 57.9 | 20.0 | -   | - | -   | - | -   | -    | 95   | 190  | 110 | 38 | - | - | - | - | -   |
| East Asia | Taiwanese         | 15385837 | 34   | 5.3  | -   | - | -   | - | -   | -    | 169  | 338  | 115 | 18 | - | - | - | - | -   |
| East Asia | Taiwanese         | 9110363  | 32   | 5.5  | -   | - | -   | - | -   | -    | 118  | 236  | 76  | 13 | - | - | - | - | -   |
| East Asia | Thai              | 11686476 | 34.7 | 4.5  | -   | - | -   | - | -   | -    | 121  | 242  | 84  | 11 | - | - | - | - | -   |
| East Asia | Thai              | 20358205 | 24.6 | -    | -   | - | -   | - | -   | -    | 71   | 142  | 35  | -  | - | - | - | - | -   |
| East Asia | Thai              | 16946555 | 29   | 3    | -   | - | -   | - | -   | -    | 774  | 1548 | 449 | 46 | - | - | - | - | -   |
| East Asia | Vietnamese        | 18979093 | 30.6 | 6.3  | -   | - | -   | - | -   | -    | 72   | 144  | 44  | 9  | - | - | - | - | -   |
| East Asia | Vietnamese        | 17667801 | 26.4 | 4.8  | -   | - | -   | - | -   | -    | 165  | 330  | 87  | 16 | - | - | - | - | -   |
| East Asia | Vietnamese        | 11686476 | 26.7 | 13.3 | -   | - | -   | - | -   | -    | 90   | 180  | 48  | 24 | - | - | - | - | -   |
| Europe    | Ashkenazi Jewish  | 18240905 | 15.2 | -    | 1.8 | - | -   | - | -   | -    | 250  | 500  | 76  | -  | 9 | - | - | - | -   |
| Europe    | Belgian           | 14616425 | 9.1  | -    | -   | - | -   | - | -   | -    | 121  | 242  | 22  | -  | - | - | - | - | -   |
| Europe    | Bosnian           | 21108610 | 16.9 | -    | -   | - | -   | - | -   | -    | 77   | 154  | 26  | -  | - | - | - | - | -   |
| Europe    | Bulgarian         | 18021343 | 13.5 | -    | -   | - | -   | - | -   | -    | 96   | 192  | 26  | -  | - | - | - | - | -   |
| Europe    | Caucasian         | 18231117 | 13.6 | 0    | 0.3 | 0 | -   | - | -   | 20.1 | 143  | 286  | 39  | 0  | 1 | 0 | - | - | 57  |
| Europe    | Caucasian         | 19463375 | 13.3 | -    | 2.5 | - | -   | - | -   | 20.8 | 60   | 120  | 16  | -  | 3 | - | - | - | 25  |
| Europe    | Caucasian         | 18521743 | -    | -    | -   | - | -   | - | -   | 23.1 | 1989 | 3978 | -   | -  | - | - | - | - | 919 |
| Europe    | Caucasian         | 20173083 | 15   | 0.1  | 0.1 | - | 0.1 | - | 0.1 | -    | 454  | 908  | 136 | 1  | 1 | - | - | 0 | -   |
| Europe    | Caucasian         | 12823155 | 14.2 | 0    | 0   | - | -   | - | -   | -    | 60   | 120  | 17  | 0  | 0 | - | - | - | -   |
| Europe    | Caucasian         | 15590749 | 16.9 | 0    | 0   | - | -   | - | -   | -    | 59   | 118  | 20  | 0  | 0 | - | - | - | -   |
| Europe    | Caucasian         | 20857895 | 14.0 | 0    | -   | - | -   | - | -   | -    | 203  | 406  | 57  | 0  | - | - | - | - | -   |

|        |                   |          |      |     |     |   |     |   |   |      |      |      |      |    |   |   |   |   |   |     |
|--------|-------------------|----------|------|-----|-----|---|-----|---|---|------|------|------|------|----|---|---|---|---|---|-----|
| Europe | Caucasian         | 21047200 | 17.9 | 0   | -   | - | -   | - | - | -    | 215  | 430  | 77   | 0  | - | - | - | - | - | -   |
| Europe | Caucasian         | 21108329 | 15.4 | 0.1 | -   | - | -   | - | - | -    | 344  | 688  | 106  | 1  | - | - | - | - | - | -   |
| Europe | Caucasian         | 20064729 | 15.7 | 0.5 | -   | - | -   | - | - | -    | 289  | 578  | 91   | 3  | - | - | - | - | - | -   |
| Europe | Caucasian         | 19337788 | 14.5 | 6.5 | -   | - | -   | - | - | -    | 186  | 372  | 54   | 24 | - | - | - | - | - | -   |
| Europe | Caucasian         | 18496131 | 16.5 | -   | -   | - | -   | - | - | -    | 124  | 248  | 41   | -  | - | - | - | - | - | -   |
| Europe | Caucasian         | 20179710 | 15.2 | -   | -   | - | -   | - | - | -    | 230  | 460  | 70   | -  | - | - | - | - | - | -   |
| Europe | Caucasian         | 18482659 | 16.4 | -   | -   | - | -   | - | - | -    | 797  | 1594 | 262  | -  | - | - | - | - | - | -   |
| Europe | Caucasian         | 11037802 | 14.0 | -   | -   | - | -   | - | - | -    | 952  | 1904 | 267  | -  | - | - | - | - | - | -   |
| Europe | Caucasian         | 18521743 | 14.5 | -   | -   | - | -   | - | - | -    | 1960 | 3920 | 570  | -  | - | - | - | - | - | -   |
| Europe | Caucasian         | 16815315 | 12.7 | 0.9 | -   | - | -   | - | - | -    | 273  | 546  | 69   | 5  | - | - | - | - | - | -   |
| Europe | Caucasian         | 19169185 | 14.2 | 0   | -   | - | -   | - | - | -    | 3774 | 7548 | 1072 | 0  | - | - | - | - | - | -   |
| Europe | Central European  | 19581389 | 8.5  | -   | -   | - | -   | - | - | 33.8 | 71   | 142  | 12   | -  | - | - | - | - | - | 48  |
| Europe | Croatian          | 12950145 | 15.0 | -   | -   | - | -   | - | - | -    | 200  | 400  | 60   | -  | - | - | - | - | - | -   |
| Europe | Danish            | 20665013 | 15.0 | -   | -   | - | -   | - | - | 20.1 | 276  | 552  | 83   | -  | - | - | - | - | - | 111 |
| Europe | Danish            | 16044105 | 13.8 | 0   | -   | - | -   | - | - | -    | 69   | 138  | 19   | 0  | - | - | - | - | - | -   |
| Europe | Danish            | 19192051 | 13.0 | 0   | -   | - | -   | - | - | -    | 300  | 600  | 78   | 0  | - | - | - | - | - | -   |
| Europe | Danish            | 9754988  | 16.5 | 0.0 | -   | - | -   | - | - | -    | 303  | 606  | 100  | 0  | - | - | - | - | - | -   |
| Europe | Danish            | 20684753 | 10.9 | -   | -   | - | -   | - | - | -    | 339  | 678  | 74   | -  | - | - | - | - | - | -   |
| Europe | Dutch             | 20531370 | 13.3 | -   | -   | - | -   | - | - | 22.1 | 678  | 1356 | 181  | -  | - | - | - | - | - | 299 |
| Europe | Dutch             | 19884907 | 15.4 | -   | -   | - | -   | - | - | 24.4 | 178  | 356  | 55   | -  | - | - | - | - | - | 87  |
| Europe | Dutch             | 19934793 | 16.8 | 0.2 | -   | - | -   | - | - | -    | 428  | 856  | 144  | 2  | - | - | - | - | - | -   |
| Europe | Dutch             | 11829201 | 12.9 | 0.2 | -   | - | -   | - | - | -    | 765  | 1530 | 198  | 3  | - | - | - | - | - | -   |
| Europe | Dutch             | 18854779 | 17.7 | -   | -   | - | -   | - | - | -    | 113  | 226  | 40   | -  | - | - | - | - | - | -   |
| Europe | Dutch             | 17667959 | 15   | -   | -   | - | -   | - | - | -    | 181  | 362  | 54   | -  | - | - | - | - | - | -   |
| Europe | English           | 12419832 | 13.4 | -   | -   | - | -   | - | - | -    | 1082 | 2164 | 291  | -  | - | - | - | - | - | -   |
| Europe | European          | 9435198  | 13   | 0.3 | 0.6 | - | -   | - | - | -    | 173  | 346  | 45   | 1  | 2 | - | - | - | - | -   |
| Europe | European-American | 9110363  | 13   | 0   | -   | - | -   | - | - | -    | 105  | 210  | 27   | 0  | - | - | - | - | - | -   |
| Europe | Faroese           | 20665013 | 18.6 | -   | -   | - | -   | - | - | 15.4 | 311  | 622  | 116  | -  | - | - | - | - | - | 96  |
| Europe | Faroese           | 16025294 | 18.8 | 0   | -   | - | -   | - | - | -    | 312  | 624  | 117  | 0  | - | - | - | - | - | -   |
| Europe | Finnish           | 16024198 | 16.4 | 0   | -   | - | -   | - | - | -    | 177  | 354  | 58   | 0  | - | - | - | - | - | -   |
| Europe | Finnish           | 17635176 | 17.6 | -   | -   | - | -   | - | - | -    | 449  | 898  | 158  | -  | - | - | - | - | - | -   |
| Europe | French            | 19496924 | -    | -   | 0.7 | 0 | 0.1 | - | - | 20.0 | 598  | 1196 | -    | -  | 8 | 0 | 1 | - | - | 239 |
| Europe | French            | 18205890 | 18.4 | -   | -   | - | -   | - | - | -    | 359  | 718  | 132  | -  | - | - | - | - | - | -   |
| Europe | French            | 20708365 | 17.6 | -   | -   | - | -   | - | - | -    | 411  | 822  | 145  | -  | - | - | - | - | - | -   |
| Europe | French            | 18394438 | 15.7 | -   | -   | - | -   | - | - | -    | 603  | 1206 | 189  | -  | - | - | - | - | - | -   |
| Europe | German            | 20492469 | 13.5 | -   | -   | - | -   | - | - | 21.3 | 986  | 1972 | 267  | -  | - | - | - | - | - | 421 |
| Europe | German            | 20083681 | -    | -   | -   | - | -   | - | - | 22.9 | 1524 | 3048 | -    | -  | - | - | - | - | - | 698 |
| Europe | German            | 18781853 | 15.1 | 0.0 | -   | - | -   | - | - | 25.7 | 423  | 846  | 128  | 0  | - | - | - | - | - | 217 |

|        |            |          |             |          |          |   |   |   |   |      |      |       |             |           |          |   |   |   |   |            |
|--------|------------|----------|-------------|----------|----------|---|---|---|---|------|------|-------|-------------|-----------|----------|---|---|---|---|------------|
| Europe | German     | 20826260 | 14.4        | -        | -        | - | - | - | - | -    | 928  | 1856  | <b>268</b>  | -         | -        | - | - | - | - | <b>417</b> |
| Europe | German     | 16116487 | 15.8        | 0        | -        | - | - | - | - | -    | 60   | 120   | <b>19</b>   | <b>0</b>  | -        | - | - | - | - | -          |
| Europe | German     | 7663532  | 12.1        | 0        | -        | - | - | - | - | -    | 174  | 348   | <b>42</b>   | <b>0</b>  | -        | - | - | - | - | -          |
| Europe | German     | 17680025 | 11.9        | 3.8      | -        | - | - | - | - | -    | 572  | 1144  | <b>136</b>  | <b>44</b> | -        | - | - | - | - | -          |
| Europe | German     | 14586385 | 15.6        | -        | -        | - | - | - | - | -    | 96   | 192   | <b>30</b>   | -         | -        | - | - | - | - | -          |
| Europe | German     | 15371981 | 18.3        | -        | -        | - | - | - | - | -    | 131  | 262   | <b>48</b>   | -         | -        | - | - | - | - | -          |
| Europe | German     | 19415824 | 15.0        | -        | -        | - | - | - | - | -    | 533  | 1066  | <b>160</b>  | -         | -        | - | - | - | - | -          |
| Europe | German     | 12713578 | 15.0        | -        | -        | - | - | - | - | -    | 562  | 1124  | <b>169</b>  | -         | -        | - | - | - | - | -          |
| Europe | German     | 20510210 | 16.3        | -        | -        | - | - | - | - | -    | 760  | 1520  | <b>248</b>  | -         | -        | - | - | - | - | -          |
| Europe | German     | 19193675 | 14.6        | -        | -        | - | - | - | - | -    | 2485 | 4970  | <b>727</b>  | -         | -        | - | - | - | - | -          |
| Europe | German     | 19424794 | 14.6        | -        | -        | - | - | - | - | -    | 8609 | 17218 | <b>2510</b> | -         | -        | - | - | - | - | -          |
| Europe | German     | 16413243 | <b>12.7</b> | -        | <b>1</b> | - | - | - | - | -    | 51   | 102   | 13          | -         | 1        | - | - | - | - | -          |
| Europe | Greek      | 19102714 | 13.1        | 0        | -        | - | - | - | - | 19.6 | 283  | 566   | <b>74</b>   | <b>0</b>  | -        | - | - | - | - | <b>111</b> |
| Europe | Italian    | 20309015 | 14.3        | -        | -        | - | - | - | - | 17.6 | 182  | 364   | <b>52</b>   | -         | -        | - | - | - | - | <b>64</b>  |
| Europe | Italian    | 15177309 | <b>11.1</b> | <b>0</b> | -        | - | - | - | - | -    | 360  | 720   | 80          | 0         | -        | - | - | - | - | -          |
| Europe | Italian    | 12496751 | 12.4        | -        | -        | - | - | - | - | -    | 93   | 186   | <b>23</b>   | -         | -        | - | - | - | - | -          |
| Europe | Italian    | 19268736 | 17.7        | -        | -        | - | - | - | - | -    | 772  | 1544  | <b>273</b>  | -         | -        | - | - | - | - | -          |
| Europe | Italian    | 18004210 | 17.1        | -        | -        | - | - | - | - | -    | 1419 | 2838  | <b>485</b>  | -         | -        | - | - | - | - | -          |
| Europe | Norwegian  | 20565970 | 17.8        | -        | -        | - | - | - | - | 21.7 | 90   | 180   | <b>32</b>   | -         | -        | - | - | - | - | <b>39</b>  |
| Europe | Norwegian  | 20665013 | 15.2        | -        | -        | - | - | - | - | 22.0 | 309  | 618   | <b>94</b>   | -         | -        | - | - | - | - | <b>136</b> |
| Europe | Norwegian  | 18677622 | -           | -        | -        | - | - | - | - | 23.6 | 121  | 242   | -           | -         | -        | - | - | - | - | <b>57</b>  |
| Europe | Norwegian  | 17625515 | 18.1        | 0.6      | -        | - | - | - | - | -    | 166  | 332   | <b>60</b>   | <b>2</b>  | -        | - | - | - | - | <b>73</b>  |
| Europe | Norwegian  | 12835613 | 15.2        | 0        | 0        | - | - | - | - | -    | 128  | 256   | <b>39</b>   | <b>0</b>  | <b>0</b> | - | - | - | - | -          |
| Europe | Norwegian  | 16418702 | 19.9        | -        | -        | - | - | - | - | -    | 83   | 166   | <b>33</b>   | -         | -        | - | - | - | - | -          |
| Europe | Polish     | 16912869 | 11.6        | -        | -        | - | - | - | - | 27.2 | 125  | 250   | <b>29</b>   | -         | -        | - | - | - | - | <b>68</b>  |
| Europe | Polish     | 20376628 | 12.6        | -        | -        | - | - | - | - | 28.1 | 139  | 278   | <b>35</b>   | -         | -        | - | - | - | - | <b>78</b>  |
| Europe | Polish     | 15976989 | 10.0        | -        | -        | - | - | - | - | -    | 70   | 140   | <b>14</b>   | -         | -        | - | - | - | - | -          |
| Europe | Polish     | 18577829 | 10.5        | -        | -        | - | - | - | - | -    | 105  | 210   | <b>22</b>   | -         | -        | - | - | - | - | -          |
| Europe | Polish     | 20924183 | 11.9        | -        | -        | - | - | - | - | -    | 261  | 522   | <b>62</b>   | -         | -        | - | - | - | - | -          |
| Europe | Portuguese | 9295062  | 13.1        | 0        | -        | - | - | - | - | -    | 153  | 306   | <b>40</b>   | <b>0</b>  | -        | - | - | - | - | -          |
| Europe | Portuguese | 18240903 | <b>14</b>   | -        | -        | - | - | - | - | -    | 126  | 252   | 35          | -         | -        | - | - | - | - | -          |
| Europe | Russian    | 12879168 | 11.4        | 0.3      | -        | - | - | - | - | -    | 290  | 580   | <b>66</b>   | <b>2</b>  | -        | - | - | - | - | -          |
| Europe | Russian    | 18061941 | 9.4         | -        | -        | - | - | - | - | -    | 159  | 318   | <b>30</b>   | -         | -        | - | - | - | - | -          |
| Europe | Russian    | 20373852 | 13.1        | -        | -        | - | - | - | - | -    | 352  | 704   | <b>92</b>   | -         | -        | - | - | - | - | -          |
| Europe | Siberian   | 18597650 | -           | 3.5      | -        | - | - | - | - | -    | 437  | 874   | -           | <b>31</b> | -        | - | - | - | - | -          |
| Europe | Siberian   | 18597650 | 17.3        | -        | -        | - | - | - | - | -    | 433  | 866   | <b>150</b>  | -         | -        | - | - | - | - | -          |
| Europe | Slovenian  | 18496682 | 10.5        | -        | -        | - | - | - | - | 32.9 | 105  | 210   | <b>22</b>   | -         | -        | - | - | - | - | <b>69</b>  |
| Europe | Spanish    | 15728438 | 13.7        | -        | -        | - | - | - | - | -    | 300  | 600   | <b>82</b>   | -         | -        | - | - | - | - | -          |

|             |                    |          |      |     |     |     |     |   |     |      |       |       |      |    |    |   |   |   |     |   |
|-------------|--------------------|----------|------|-----|-----|-----|-----|---|-----|------|-------|-------|------|----|----|---|---|---|-----|---|
| Europe      | Spanish            | 16006997 | 13.9 | -   | -   | -   | -   | - | -   | -    | 672   | 1344  | 187  | -  | -  | - | - | - | -   | - |
| Europe      | Swedish            | 20499227 | 28   | 11  | -   | -   | -   | - | -   | 0.3  | 185   | 370   | 104  | 41 | -  | - | - | - | -   | 1 |
| Europe      | Swedish            | 16413245 | -    | -   | -   | -   | -   | - | -   | 6.4  | 314   | 628   | -    | -  | -  | - | - | - | 40  |   |
| Europe      | Swedish            | 19907421 | 14.5 | -   | 0.1 | -   | -   | - | -   | 17.7 | 713   | 1426  | 207  | -  | 1  | - | - | - | 252 |   |
| Europe      | Swedish            | 20468063 | 15.1 | -   | -   | -   | -   | - | -   | 19.0 | 1416  | 2832  | 427  | -  | -  | - | - | - | 537 |   |
| Europe      | Swedish            | 8747407  | 11.7 | 0.3 | -   | -   | -   | - | -   | -    | 175   | 350   | 41   | 1  | -  | - | - | - | -   |   |
| Europe      | Swedish            | 9776439  | 14.5 | 0.4 | -   | -   | -   | - | -   | -    | 245   | 490   | 71   | 2  | -  | - | - | - | -   |   |
| Europe      | Swedish            | 9772024  | 15.5 | 0   | -   | -   | -   | - | -   | -    | 110   | 220   | 34   | 4  | -  | - | - | - | -   |   |
| Europe      | Swedish            | 9829356  | 12.6 | 1.4 | -   | -   | -   | - | -   | -    | 143   | 286   | 36   | 4  | -  | - | - | - | -   |   |
| Europe      | Swiss              | 16338275 | 16.3 | 0.2 | -   | -   | -   | - | -   | -    | 208   | 416   | 68   | 1  | -  | - | - | - | -   |   |
| Europe      | Swiss              | 17697139 | 13.8 | -   | -   | -   | -   | - | -   | -    | 94    | 188   | 26   | -  | -  | - | - | - | -   |   |
| Europe      | Swiss              | 17681590 | 17.9 | -   | -   | -   | -   | - | -   | -    | 81    | 162   | 29   | -  | -  | - | - | - | -   |   |
| Europe      | Swiss              | 11809184 | 13.4 | -   | -   | -   | -   | - | -   | -    | 123   | 246   | 33   | -  | -  | - | - | - | -   |   |
| Europe      | Swiss              | 17178267 | 16.7 | 0.1 | -   | -   | -   | - | -   | -    | 245   | 490   | 82   | 0  | -  | - | - | - | -   |   |
| Europe      | Turkish            | 10460072 | 12   | 0.4 | 0   | 0   | -   | - | -   | -    | 404   | 808   | 97   | 3  | 0  | 0 | - | - | -   |   |
| Europe      | Turkish            | 19499406 | 12.0 | 0   | -   | -   | -   | - | -   | -    | 100   | 200   | 24   | 0  | -  | - | - | - | -   |   |
| Europe      | Turkish            | 17269966 | 11.5 | 0   | -   | -   | -   | - | -   | -    | 169   | 338   | 39   | 0  | -  | - | - | - | -   |   |
| Europe      | Turkish            | 17290075 | 21.7 | 0   | -   | -   | -   | - | -   | -    | 182   | 364   | 79   | 0  | -  | - | - | - | -   |   |
| Europe      | Turkish            | 20533108 | 11.4 | 5.2 | -   | -   | -   | - | -   | -    | 105   | 210   | 24   | 11 | -  | - | - | - | -   |   |
| Europe      | Turkish            | 17868191 | 12.1 | 4.0 | -   | -   | -   | - | -   | -    | 199   | 398   | 48   | 16 | -  | - | - | - | -   |   |
| Europe      | Turkish            | 11908757 | 9.4  | 8.9 | -   | -   | -   | - | -   | -    | 96    | 192   | 18   | 17 | -  | - | - | - | -   |   |
| Europe      | Turkish            | 19821196 | 13   | 1   | -   | -   | -   | - | -   | -    | 100   | 200   | 26   | 2  | -  | - | - | - | -   |   |
| Europe      | White              | 19106084 | -    | -   | -   | -   | -   | - | -   | 19.5 | 2164  | 4328  | -    | -  | -  | - | - | - | 844 |   |
| Europe      | White              | 20801498 | 14.1 | 0.1 | 0.1 | 0.0 | 0.0 | 0 | 0.4 | 22.3 | 10285 | 20570 | 2899 | 16 | 26 | 1 | 2 | 0 | 74  |   |
| Europe      | White              | 19106083 | -    | -   | -   | 0.0 | -   | - | -   | -    | 2176  | 4352  | -    | -  | -  | 1 | - | - | -   |   |
| Europe      | White              | 19106083 | -    | -   | 0.5 | -   | -   | - | -   | -    | 2189  | 4378  | -    | -  | 21 | - | - | - | -   |   |
| Europe      | White              | 19106083 | -    | 0.0 | -   | -   | -   | - | -   | -    | 2187  | 4374  | -    | 1  | -  | - | - | - | -   |   |
| Europe      | White              | 19106083 | 15.4 | -   | -   | -   | -   | - | -   | -    | 2178  | 4356  | 670  | -  | -  | - | - | - | -   |   |
| Europe      | White/Non-Hispanic | 21192344 | 13.3 | 0   | 0.4 | -   | 0.0 | - | 0.4 | 22.5 | 1253  | 2506  | 333  | 0  | 10 | - | 1 | - | 10  |   |
| Middle East | Bedouin            | 15651900 | 12.0 | 1.0 | -   | -   | -   | - | -   | -    | 50    | 100   | 12   | 1  | -  | - | - | - | -   |   |
| Middle East | Iranian            | 17201743 | 14.0 | 0.0 | -   | -   | -   | - | -   | -    | 200   | 400   | 56   | 0  | -  | - | - | - | -   |   |
| Middle East | Iranian            | 20804307 | 13.4 | 1.8 | -   | -   | -   | - | -   | -    | 82    | 164   | 22   | 3  | -  | - | - | - | -   |   |
| Middle East | Iranian            | 20637959 | 11.1 | 1.0 | -   | -   | -   | - | -   | -    | 99    | 198   | 22   | 2  | -  | - | - | - | -   |   |
| Middle East | Iranian            | 20885015 | 12.3 | 0.7 | -   | -   | -   | - | -   | -    | 150   | 300   | 37   | 2  | -  | - | - | - | -   |   |
| Middle East | Jewish Israeli     | 10096259 | 15.4 | 0.7 | -   | -   | -   | - | -   | -    | 140   | 280   | 43   | 2  | -  | - | - | - | -   |   |
| Middle East | Palestinian        | 19193970 | 7.1  | 2.6 | -   | -   | -   | - | -   | -    | 252   | 504   | 36   | 13 | -  | - | - | - | -   |   |
| Middle East | Saudi Arabians     | 9110363  | 15.0 | 0.0 | -   | -   | -   | - | -   | -    | 97    | 194   | 29   | 0  | -  | - | - | - | -   |   |

|                           |                              |          |             |             |   |   |   |   |   |   |      |       |            |            |          |          |          |   |   |   |
|---------------------------|------------------------------|----------|-------------|-------------|---|---|---|---|---|---|------|-------|------------|------------|----------|----------|----------|---|---|---|
| <b>Oceania</b>            | Filipinos                    | 9110363  | <b>39</b>   | <b>7.7</b>  | - | - | - | - | - | - | 52   | 104   | 41         | 8          | -        | -        | -        | - | - | - |
| <b>Oceania</b>            | Maori                        | 18425152 | <b>24</b>   | <b>1.7</b>  | - | - | - | - | - | - | 60   | 120   | 29         | 2          | -        | -        | -        | - | - | - |
| <b>Oceania</b>            | Sepik (pooled study)         | 14583683 | <b>45</b>   | <b>16</b>   | - | - | - | - | - | - | 401  | 802   | 361        | 127        | -        | -        | -        | - | - | - |
| <b>Oceania</b>            | Vanuatuan (pooled study)     | 10591538 | <b>63</b>   | <b>15</b>   | - | - | - | - | - | - | 5638 | 11276 | 7132       | 1660       | -        | -        | -        | - | - | - |
| <b>Oceania</b>            | Vanuatuan (pooled study)     | 9093256  | 70.8        | 13.3        | - | - | - | - | - | - | 493  | 986   | <b>698</b> | <b>131</b> | -        | -        | -        | - | - | - |
| <b>Oceania</b>            | Western Australian Aborigine | 11207032 | <b>35.5</b> | <b>14.3</b> | - | - | - | - | - | - | 227  | 454   | 161        | 65         | -        | -        | -        | - | - | - |
|                           |                              |          |             |             |   |   |   |   |   |   |      |       |            |            |          |          |          |   |   |   |
| <b>South/Central Asia</b> | Maharashtrian (India)        | 17978853 | 46.0        | 1.1         | - | - | - | - | - | - | 139  | 278   | <b>128</b> | <b>3</b>   | -        | -        | -        | - | - | - |
| <b>South/Central Asia</b> | North Indian                 | 11014415 | 29.8        | 0           | - | - | - | - | - | - | 121  | 242   | <b>72</b>  | <b>0</b>   | -        | -        | -        | - | - | - |
| <b>South/Central Asia</b> | North Indian                 | 20602612 | 36.3        | 0.4         | - | - | - | - | - | - | 457  | 914   | <b>332</b> | <b>4</b>   | -        | -        | -        | - | - | - |
| <b>South/Central Asia</b> | North Indian                 | 18644391 | 34.1        | 5.8         | - | - | - | - | - | - | 600  | 1200  | <b>409</b> | <b>70</b>  | -        | -        | -        | - | - | - |
| <b>South/Central Asia</b> | North Indian                 | 19954746 | 34.9        | -           | - | - | - | - | - | - | 750  | 1500  | <b>523</b> | -          | -        | -        | -        | - | - | - |
| <b>South/Central Asia</b> | North Indian                 | 19942749 | 29.1        | -           | - | - | - | - | - | - | 91   | 182   | <b>53</b>  | -          | -        | -        | -        | - | - | - |
| <b>South/Central Asia</b> | Pakistani                    | 20102361 | 27.2        | -           | - | - | - | - | - | - | 68   | 136   | <b>37</b>  | -          | -        | -        | -        | - | - | - |
| <b>South/Central Asia</b> | South Indian                 | 15662508 | 36.7        | 0.5         | 0 | 0 | 0 | - | - | - | 300  | 600   | <b>220</b> | <b>3</b>   | <b>0</b> | <b>0</b> | <b>0</b> | - | - | - |
| <b>South/Central Asia</b> | South Indian                 | 15660966 | 34.2        | 0.6         | - | - | - | - | - | - | 341  | 682   | <b>233</b> | <b>4</b>   | -        | -        | -        | - | - | - |
| <b>South/Central Asia</b> | South Indian                 | 20045989 | <b>38</b>   | <b>2</b>    | - | - | - | - | - | - | 50   | 100   | 38         | 2          | -        | -        | -        | - | - | - |
| <b>South/Central Asia</b> | South Indian                 | 19430176 | <b>37.1</b> | <b>2.5</b>  | - | - | - | - | - | - | 58   | 116   | 43         | 3          | -        | -        | -        | - | - | - |
| <b>South/Central Asia</b> | Tamilian                     | 20390258 | 42.0        | 0.7         | - | - | - | - | - | - | 292  | 584   | <b>245</b> | <b>4</b>   | -        | -        | -        | - | - | - |
| <b>South/Central Asia</b> | Tamilian                     | 12919183 | <b>37.9</b> | <b>2.2</b>  | - | - | - | - | - | - | 112  | 224   | 85         | 5          | -        | -        | -        | - | - | - |
| <b>South/Central Asia</b> | Uighur Chinese               | 20460345 | -           | 2.4         | - | - | - | - | - | - | 706  | 1412  | -          | <b>34</b>  | -        | -        | -        | - | - | - |
| <b>South/Central Asia</b> | Uigur Chinese                | 15612662 | 49.0        | 1.6         | - | - | - | - | - | - | 96   | 192   | <b>94</b>  | <b>3</b>   | -        | -        | -        | - | - | - |
| <b>South/Central Asia</b> | Uyur Chinese                 | 19444287 | 16.1        | 9.4         | - | - | - | - | - | - | 149  | 298   | <b>48</b>  | <b>28</b>  | -        | -        | -        | - | - | - |

<sup>1</sup> Worldwide subpopulations and ethnicities were grouped based on the Human Genome Diversity Project-Centre Etude Polymorphism Humain (HGDP-CEPH) (21, 22).

<sup>2</sup> PMID is a unique PubMed Identifier number assigned to each PubMed citation of life sciences and biomedical scientific journal articles: <http://www.ncbi.nlm.nih.gov/pubmed/>.

<sup>3</sup> Data in bold were manually retrieved from each study; non-bold data were calculated and derived from the applicable reported (bold) data. Alleles not interrogated in a given study are noted by a dashed line ('-').

<sup>4</sup> Because the *CYP2C19\*17* allele was identified in 2006 (103), *CYP2C19* studies prior to this date did not include this allele.
