# Supplementary material
Source: PubMed Central journal article supplement (PMC3748366)
Supplement: clpt2013105x6.pdf [file clpt2013105x6.pdf]

**Supplemental Table S5. Predicted metabolizer phenotypes based on *CYP2C19* genotype and predicted average frequencies**

|               | <b>Predicted Metabolizer Phenotype (Average Multi-Ethnic Frequency<sup>1</sup>)</b> |                |               |             |             |             |             |             |                           |
|---------------|-------------------------------------------------------------------------------------|----------------|---------------|-------------|-------------|-------------|-------------|-------------|---------------------------|
| <b>Allele</b> | <b>*1</b>                                                                           | <b>*2</b>      | <b>*3</b>     | <b>*4</b>   | <b>*5</b>   | <b>*6</b>   | <b>*7</b>   | <b>*8</b>   | <b>*17</b>                |
| <b>*1</b>     | EM<br>(35-50%)                                                                      | IM<br>(17-35%) | IM<br>(1-11%) | IM<br>(<1%) | IM<br>(<1%) | IM<br>(<1%) | IM<br>(<1%) | IM<br>(<1%) | UM<br>(3-27%)             |
| <b>*2</b>     |                                                                                     | PM<br>(2-8%)   | PM<br>(0-5%)  | PM<br>(<1%) | PM<br>(<1%) | PM<br>(<1%) | PM<br>(<1%) | PM<br>(<1%) | IM <sup>2</sup><br>(1-6%) |
| <b>*3</b>     |                                                                                     |                | PM<br>(<1%)   | PM<br>(<1%) | PM<br>(<1%) | PM<br>(<1%) | PM<br>(<1%) | PM<br>(<1%) | IM <sup>2</sup><br>(<1%)  |
| <b>*4</b>     |                                                                                     |                |               | PM<br>(<1%) | PM<br>(<1%) | PM<br>(<1%) | PM<br>(<1%) | PM<br>(<1%) | IM <sup>2</sup><br>(<1%)  |
| <b>*5</b>     |                                                                                     |                |               |             | PM<br>(<1%) | PM<br>(<1%) | PM<br>(<1%) | PM<br>(<1%) | IM <sup>2</sup><br>(<1%)  |
| <b>*6</b>     |                                                                                     |                |               |             |             | PM<br>(<1%) | PM<br>(<1%) | PM<br>(<1%) | IM <sup>2</sup><br>(<1%)  |
| <b>*7</b>     |                                                                                     |                |               |             |             |             | PM<br>(<1%) | PM<br>(<1%) | IM <sup>2</sup><br>(<1%)  |
| <b>*8</b>     |                                                                                     |                |               |             |             |             |             | PM<br>(<1%) | IM <sup>2</sup><br>(<1%)  |
| <b>*17</b>    |                                                                                     |                |               |             |             |             |             |             | UM<br>(1-5%)              |

EM: extensive metabolizer; IM: intermediate metabolizer; PM: poor metabolizer; UM: ultrarapid metabolizer.

<sup>1</sup> Frequencies of predicted metabolizer phenotypes were determined using the allele frequencies from **Supplemental Tables S3 and S4** and the Hardy-Weinberg equation.

<sup>2</sup> The predicted metabolizer phenotype for these genotypes are provisional classifications. The currently available evidence indicates that the \*17 gain-of-function allele is unable to completely compensate for the \*2 loss-of-function allele (106); however, this data has not been consistently replicated and is therefore a provisional classification.
