# Supplementary material
Source: PubMed Central journal article supplement (PMC3748366)
Supplement: clpt2013105x7.pdf [file clpt2013105x7.pdf]

**Supplemental Table S6. Evidence linking *CYP2C19* genotype with clopidogrel response.**

| Type of Experimental Model | Major Findings                                                                                                                                     | References                                                                                                                                                                                                                | Level of Evidence* |
|----------------------------|----------------------------------------------------------------------------------------------------------------------------------------------------|---------------------------------------------------------------------------------------------------------------------------------------------------------------------------------------------------------------------------|--------------------|
| In vitro                   | <i>CYP2C19</i> *2 (c.681G>A; rs4244285) is a common polymorphism that results in a splicing defect and non-functional <i>CYP2C19</i> protein.      | de Morais, <i>et al.</i> 1994 (96)                                                                                                                                                                                        | High               |
| In vitro                   | The <i>CYP2C19</i> *3 - *8 variant alleles result in loss-of-function.                                                                             | de Morais, <i>et al.</i> 1994 (97),<br>Xiao, <i>et al.</i> 1997 (98),<br>Ferguson, <i>et al.</i> 1998 (99),<br>Ibeanu, <i>et al.</i> 1998 (100),<br>Ibeanu, <i>et al.</i> 1998 (101),<br>Ibeanu, <i>et al.</i> 1999 (102) | High               |
| In vitro/In vivo           | <i>CYP2C19</i> *17 (c.-806C>T; rs12248560) is a common polymorphism that results in increased activity as a consequence of enhanced transcription. | Sim, <i>et al.</i> 2006 (103),<br>Rudberg, <i>et al.</i> 2008 (104),<br>Li-Wan-Po, <i>et al.</i> 2010 (105)                                                                                                               | High               |
| In vitro                   | <i>CYP1A2</i> , <i>CYP2B6</i> , <i>CYP2C9</i> , <i>CYP2C19</i> and <i>CYP3A4/5</i> are involved in the hepatic metabolism of clopidogrel.          | Savi, <i>et al.</i> 1992 (107),<br>Savi, <i>et al.</i> 2000 (108),<br>Clarke, <i>et al.</i> 2003 (109),<br>Farid, <i>et al.</i> 2007 (110),<br>Kazui, <i>et al.</i> 2010 (111),<br>Abell and Liu, 2011 (112)              | High               |
| In vitro                   | <i>CYP2C19</i> contributes substantially to both oxidative steps of clopidogrel metabolism during the formation of its active metabolite.          | Kazui, <i>et al.</i> 2010 (111)                                                                                                                                                                                           | High               |
| Clinical                   | <i>CYP2C19</i> *2 is associated with reduced formation of active metabolites (pharmacokinetics) in healthy subjects treated with clopidogrel.      | Brandt, <i>et al.</i> 2007 (32),<br>Kim, <i>et al.</i> 2008 (82),<br>Umemura, <i>et al.</i> 2008 (83),<br>Mega, <i>et al.</i> 2009 (2),<br>Simon, <i>et al.</i> 2011 (57),<br>Gong, <i>et al.</i> 2012 (52),              | High               |

|          |                                                                                                                                              |                                                                                                                                                                                                                                                                                                                                                                                                                                                                                                                                                                                                                                                                                                                                                             |      |
|----------|----------------------------------------------------------------------------------------------------------------------------------------------|-------------------------------------------------------------------------------------------------------------------------------------------------------------------------------------------------------------------------------------------------------------------------------------------------------------------------------------------------------------------------------------------------------------------------------------------------------------------------------------------------------------------------------------------------------------------------------------------------------------------------------------------------------------------------------------------------------------------------------------------------------------|------|
|          |                                                                                                                                              | Kelly, <i>et al.</i> 2012 (113)                                                                                                                                                                                                                                                                                                                                                                                                                                                                                                                                                                                                                                                                                                                             |      |
| Clinical | <i>CYP2C19*2</i> is associated with reduced formation of active metabolites (pharmacokinetics) in ACS/PCI patients treated with clopidogrel. | Varenhorst, <i>et al.</i> 2009 (84),<br>Collet, <i>et al.</i> 2011 (114)                                                                                                                                                                                                                                                                                                                                                                                                                                                                                                                                                                                                                                                                                    | High |
| Clinical | <i>CYP2C19*2</i> is associated with higher on-treatment platelet reactivity (pharmacodynamics) in healthy subjects treated with clopidogrel. | Hulot, <i>et al.</i> 2006 (1),<br>Brandt, <i>et al.</i> 2007 (32),<br>Fontana, <i>et al.</i> 2007 (115),<br>Chen, <i>et al.</i> 2008 (116),<br>Kim, <i>et al.</i> 2008 (82),<br>Umemura, <i>et al.</i> 2008 (83),<br>Mega, <i>et al.</i> 2009 (2),<br>Shuldiner, <i>et al.</i> 2009 (3),<br>Simon, <i>et al.</i> 2011 (57)                                                                                                                                                                                                                                                                                                                                                                                                                                  | High |
| Clinical | <i>CYP2C19*2</i> is associated with higher on-treatment platelet reactivity (pharmacodynamics) in ACS/PCI patients treated with clopidogrel. | Giusti, <i>et al.</i> 2007 (73),<br>Frere, <i>et al.</i> 2008 (33),<br>Geisler, <i>et al.</i> 2008 (31),<br>Trenk, <i>et al.</i> 2008 (30),<br>Jinnai, <i>et al.</i> 2009 (117),<br>Shuldiner, <i>et al.</i> 2009 (3),<br>Varenhorst, <i>et al.</i> 2009 (84),<br>Harmsze, <i>et al.</i> 2010 (41),<br>Hochholzer, <i>et al.</i> 2010 (118),<br>Jeong, <i>et al.</i> 2010 (119),<br>Kang, <i>et al.</i> 2010 (120),<br>Sibbing, <i>et al.</i> 2010 (106),<br>Bouman, <i>et al.</i> 2011 (121),<br>Collet, <i>et al.</i> 2011 (114),<br>Cuisset, <i>et al.</i> 2011 (122),<br>Gurbel, <i>et al.</i> 2011 (36),<br>Hwang, <i>et al.</i> 2011 (123),<br>Jeong, <i>et al.</i> 2011 (124),<br>Maeda, <i>et al.</i> 2011 (125),<br>Ono, <i>et al.</i> 2011 (126), | High |

|          |                                                                                                                                                                                                  |                                                                                                                                                                                                                                                                                                                                                                                                                                                                                                                                                                                                                                                                                                         |      |
|----------|--------------------------------------------------------------------------------------------------------------------------------------------------------------------------------------------------|---------------------------------------------------------------------------------------------------------------------------------------------------------------------------------------------------------------------------------------------------------------------------------------------------------------------------------------------------------------------------------------------------------------------------------------------------------------------------------------------------------------------------------------------------------------------------------------------------------------------------------------------------------------------------------------------------------|------|
|          |                                                                                                                                                                                                  | Park, <i>et al.</i> 2011 (127),<br>Rideg, <i>et al.</i> 2011 (128),<br>Yamamoto, <i>et al.</i> 2011 (129),<br>Bonello, <i>et al.</i> 2012 (130),<br>Harmsze, <i>et al.</i> 2012 (131),<br>Kassimis, <i>et al.</i> 2012 (132),<br>Kim, <i>et al.</i> 2012 (133),<br>Kreutz, <i>et al.</i> 2012 (78),<br>Oh, <i>et al.</i> 2012 (134),<br>Price, <i>et al.</i> 2012 (56),<br>Tang, <i>et al.</i> 2012 (135),<br>Wu, <i>et al.</i> 2012 (136),<br>Zou, <i>et al.</i> 2012 (137)                                                                                                                                                                                                                            |      |
| Clinical | <i>CYP2C19</i> *2 is associated with adverse cardiovascular outcomes (e.g., cardiovascular death, myocardial infarction, stroke, stent thrombosis) in ACS/PCI patients treated with clopidogrel. | Trenk, <i>et al.</i> 2008 (30),<br>Collet, <i>et al.</i> 2009 (28),<br>Giusti, <i>et al.</i> 2009 (138),<br>Mega, <i>et al.</i> 2009 (2),<br>Shuldiner, <i>et al.</i> 2009 (3),<br>Sibbing, <i>et al.</i> 2009 (4),<br>Simon, <i>et al.</i> 2009 (5),<br>Harmsze, <i>et al.</i> 2010 (139),<br>Malek, <i>et al.</i> 2010 (140),<br>Cayla, <i>et al.</i> 2011 (10),<br>Jeong, <i>et al.</i> 2011 (124),<br>Marcucci, <i>et al.</i> 2011 (141),<br>Rideg, <i>et al.</i> 2011 (128),<br>Yamamoto, <i>et al.</i> 2011 (129),<br>Delaney, <i>et al.</i> 2012 (80),<br>Oh, <i>et al.</i> 2012 (134),<br>Teixeira, <i>et al.</i> 2012 (142),<br>Wu, <i>et al.</i> 2012 (136),<br>Zou, <i>et al.</i> 2012 (137) | High |
| Clinical | <i>CYP2C19</i> *3 (and possibly other loss-of-function alleles) is                                                                                                                               | Kim, <i>et al.</i> 2008 (82),                                                                                                                                                                                                                                                                                                                                                                                                                                                                                                                                                                                                                                                                           | High |

|          |                                                                                                                                                                                                                                               |                                                                                                                                                                                                                                                                                                                                                                                                                                                                                                           |          |
|----------|-----------------------------------------------------------------------------------------------------------------------------------------------------------------------------------------------------------------------------------------------|-----------------------------------------------------------------------------------------------------------------------------------------------------------------------------------------------------------------------------------------------------------------------------------------------------------------------------------------------------------------------------------------------------------------------------------------------------------------------------------------------------------|----------|
|          | associated with lower formation of active metabolites (pharmacokinetics) in healthy subjects treated with clopidogrel.                                                                                                                        | Umemura, <i>et al.</i> 2008 (83),<br>Mega, <i>et al.</i> 2009 (2),<br>Kelly, <i>et al.</i> 2012 (113)                                                                                                                                                                                                                                                                                                                                                                                                     |          |
| Clinical | <i>CYP2C19*3</i> (and possibly other loss-of-function alleles) is associated with higher on-treatment platelet reactivity (pharmacodynamics) in healthy subjects treated with clopidogrel.                                                    | Chen, <i>et al.</i> 2008 (116),<br>Kim, <i>et al.</i> 2008 (82),<br>Umemura, <i>et al.</i> 2008 (83),<br>Mega, <i>et al.</i> 2009 (2)                                                                                                                                                                                                                                                                                                                                                                     | High     |
| Clinical | <i>CYP2C19*3</i> (and possibly other loss-of-function alleles) is associated with higher on-treatment platelet reactivity (pharmacodynamics) in ACS/PCI patients treated with clopidogrel.                                                    | Jinnai, <i>et al.</i> 2009 (117),<br>Lee, <i>et al.</i> 2009 (143),<br>Jeong, <i>et al.</i> 2010 (119),<br>Kang, <i>et al.</i> 2010 (120),<br>Hwang, <i>et al.</i> 2011 (123),<br>Jeong, <i>et al.</i> 2011 (124),<br>Maeda, <i>et al.</i> 2011 (125),<br>Ono, <i>et al.</i> 2011 (126),<br>Park, <i>et al.</i> 2011 (127),<br>Yamamoto, <i>et al.</i> 2011 (129),<br>Kim, <i>et al.</i> 2012 (133),<br>Tang, <i>et al.</i> 2012 (135),<br>Wu, <i>et al.</i> 2012 (136),<br>Zou, <i>et al.</i> 2012 (137) | High     |
| Clinical | <i>CYP2C19*3</i> (and possibly other loss-of-function alleles) is associated with adverse cardiovascular outcomes (e.g., cardiovascular death, myocardial infarction, stroke, stent thrombosis) in ACS/PCI patients treated with clopidogrel. | Collet, <i>et al.</i> 2009 (28),<br>Mega, <i>et al.</i> 2009 (2),<br>Simon, <i>et al.</i> 2009 (5),<br>Harmsze, <i>et al.</i> 2010 (139),<br>Jeong, <i>et al.</i> 2011 (124),<br>Yamamoto, <i>et al.</i> 2011 (129),<br>Wu, <i>et al.</i> 2012 (136),<br>Zou, <i>et al.</i> 2012 (137)                                                                                                                                                                                                                    | High     |
| Clinical | <i>CYP2C19*17</i> is associated with lower on-treatment platelet reactivity (pharmacodynamics) in ACS/PCI patients treated with clopidogrel.                                                                                                  | Frere, <i>et al.</i> 2009 (144),<br>Sibbing, <i>et al.</i> 2010 (29),<br>Sibbing, <i>et al.</i> 2010 (106),<br>Harmsze, <i>et al.</i> 2012 (131),                                                                                                                                                                                                                                                                                                                                                         | Moderate |

|          |                                                                                                                                                                                                                                                             |                                                                                                                                                                                 |          |
|----------|-------------------------------------------------------------------------------------------------------------------------------------------------------------------------------------------------------------------------------------------------------------|---------------------------------------------------------------------------------------------------------------------------------------------------------------------------------|----------|
|          |                                                                                                                                                                                                                                                             | Li, <i>et al.</i> 2012 (35),<br>Sorich, <i>et al.</i> 2012 (37),<br>Subraja, <i>et al.</i> 2012 (145)                                                                           |          |
| Clinical | <i>CYP2C19*17</i> is associated with enhanced clopidogrel response and an increased bleeding risk in ACS/PCI patients treated with clopidogrel.                                                                                                             | Sibbing, <i>et al.</i> 2010 (29),<br>Tiroch, <i>et al.</i> 2010 (146),<br>Harmsze, <i>et al.</i> 2012 (131),<br>Li, <i>et al.</i> 2012 (35),<br>Sorich, <i>et al.</i> 2012 (37) | Moderate |
| Clinical | <i>CYP2C19</i> loss-of-function alleles are not associated with adverse cardiovascular outcomes in coronary patients with low frequencies of PCI and with other indications (e.g., atrial fibrillation) treated with clopidogrel.                           | Pare, <i>et al.</i> 2010 (88),<br>Wallentin, <i>et al.</i> 2010 (9)                                                                                                             | High     |
| Clinical | ACS/PCI patients with <i>CYP2C19</i> reduced metabolizer genotypes have reduced risks of primary outcome with prasugrel compared to clopidogrel. However, for <i>CYP2C19</i> EMs, the risks with prasugrel and clopidogrel are not significantly different. | Sorich, <i>et al.</i> 2010 (147)                                                                                                                                                | High     |
| Clinical | ACS/PCI patients with <i>CYP2C19</i> reduced metabolizer genotypes have reduced risks of primary outcome with ticagrelor compared to clopidogrel, which was less significant among <i>CYP2C19</i> EMs and most pronounced among patients undergoing PCI.    | Wallentin, <i>et al.</i> 2010 (9),<br>Hulot, <i>et al.</i> 2011 (90)                                                                                                            | High     |

ACS: acute coronary syndrome; EM: extensive metabolizer; PCI: percutaneous coronary intervention

\* See above for description of ‘**Levels of Evidence Linking Genotype to Phenotype**’.
