# Supplementary material
Source: PubMed Central journal article supplement (PMC3748366)
Supplement: clpt2013105x8.pdf [file clpt2013105x8.pdf]

**Supplemental Table S7. Evidence linking *CYP2C19* genotype with clopidogrel response (META-ANALYSES)**

| <b>Study Design</b>                                                                                                  | <b>Study Inclusion Date</b> | <b>Significant <i>CYP2C19</i> Genotype Risk</b>                                                                                                                                                                                                                                       | <b>References</b>                 |
|----------------------------------------------------------------------------------------------------------------------|-----------------------------|---------------------------------------------------------------------------------------------------------------------------------------------------------------------------------------------------------------------------------------------------------------------------------------|-----------------------------------|
| Meta-analysis of <i>CYP2C19</i> *2 and PPI:<br>- 10 studies<br>- 11,959 total patients<br>- established CAD          | October 2009                | <b>MACE:</b><br>*2 carrier: OR: 1.29 (1.12-1.49)<br><b>ST:</b><br>*2 carrier: OR: 3.45 (2.14-5.57)<br>Heterozygotes: OR: 3.34 (1.84-5.93)<br>Homozygotes: OR: 4.68 (1.55-14.11)                                                                                                       | Hulot, <i>et al.</i> 2010 (6)     |
| Meta-analysis of <i>CYP2C19</i> *2:<br>- 8 studies<br>- 8,280 total patients<br>- established CAD undergoing PCI     | December 2009               | <b>MACE:</b><br>*2 carrier: OR: 1.46 (1.01-2.13)<br><b>Cardiac mortality:</b><br>*2 carrier: OR: 2.07 (1.22–3.52)<br><b>MI:</b><br>*2 carrier: OR: 1.69 (1.09-2.61)<br><b>ST:</b><br>*2 carrier: OR: 3.81 (2.27-6.40)<br><b>Ischemic stroke:</b><br>*2 carrier: OR: 5.78 (1.62-20.65) | Jin, <i>et al.</i> 2011 (148)     |
| Meta-analysis of <i>CYP2C19</i> *2:<br>- 7 studies<br>- 8,043 total patients<br>- established CAD                    | January 2010                | <b>MACE:</b><br>*2 carrier: RR: 1.96 (1.14-3.37)<br><b>ST:</b><br>*2 carrier: RR: 3.82 (2.23-6.54)                                                                                                                                                                                    | Sofi, <i>et al.</i> 2011 (86)     |
| Meta-analysis of <i>CYP2C19</i> LOF alleles:<br>- 9 studies<br>- 9,685 total patients<br>- established CAD (91% PCI) | August 2010                 | <b>MACE:</b><br>Heterozygotes: HR: 1.55 (1.11-2.17)<br>Homozygotes: HR: 1.76 (1.24-2.50)<br><b>ST:</b><br>Heterozygotes: HR: 2.67 (1.69-4.22)<br>Homozygotes: HR: 3.97 (1.75-9.02)                                                                                                    | Mega, <i>et al.</i> 2010 (7)      |
| Meta-analysis of <i>CYP2C19</i> LOF and GOF alleles:<br>- 11 studies (for <i>CYP2C19</i> loss-of-function alleles)   | October 2010                | <b>MACE:</b><br>*2 carrier: Not significant.                                                                                                                                                                                                                                          | Zabalza, <i>et al.</i> 2012 (149) |

|                                                                                                                                                                               |                |                                                                                                                                                                                                                                                                                                   |                                     |
|-------------------------------------------------------------------------------------------------------------------------------------------------------------------------------|----------------|---------------------------------------------------------------------------------------------------------------------------------------------------------------------------------------------------------------------------------------------------------------------------------------------------|-------------------------------------|
| - 16,360 total patients (for <i>CYP2C19</i> loss-of-function alleles)<br>- CAD and others                                                                                     |                | *17 carrier: HR: 0.75 (0.66-0.87)<br><b>ST:</b><br>*2 carrier: HR: 2.24 (1.52-3.30)<br><b>Major bleeding:</b><br>*17 carrier: HR: 1.26 (1.05-1.50)                                                                                                                                                |                                     |
| Meta-analysis of <i>CYP2C19</i> LOF and GOF alleles:<br>- 12 studies<br>- 18,529 total patients<br>- established CAD                                                          | December 2010  | <b>MACE:</b><br>LOF carrier: Not significant.<br><b>ST:</b><br>LOF carrier: OR: 1.77 (1.31-2.40)                                                                                                                                                                                                  | Bauer, <i>et al.</i> 2011 (150)     |
| Meta-analysis of <i>CYP2C19</i> LOF alleles:<br>- 16 studies<br>- 20,785 total patients<br>- established CAD                                                                  | September 2011 | <b>MACE:</b><br>*2 carrier: OR: 1.42 (1.13-1.78)<br>Heterozygotes: OR: 1.43 (0.93-2.19)<br>Homozygotes: OR: 1.75 (1.23-2.51)<br><b>Cardiac mortality:</b><br>*2 carrier: OR: 2.18 (1.37–3.47)<br><b>MI:</b><br>*2 carrier: OR: 1.42 (1.12-1.81)<br><b>ST:</b><br>*2 carrier: OR: 2.41 (1.76-3.30) | Jang, <i>et al.</i> 2012 (151)      |
| Meta-analysis of <i>CYP2C19</i> LOF and GOF alleles:<br>- 32 studies<br>- 42,016 total patients<br>- unselected                                                               | October 2011   | <b>MACE:</b><br>LOF carrier: Not significant.<br><b>Stent thrombosis:</b><br>LOF carrier: RR: 1.75 (1.50-2.03)                                                                                                                                                                                    | Holmes, <i>et al.</i> 2011 (89)     |
| Meta-analysis of <i>CYP2C19</i> *2 and VerifyNow® platelet testing:<br>- 7 studies (for <i>CYP2C19</i> )<br>- 5,307 total patients (for <i>CYP2C19</i> )<br>- established CAD | October 2011   | <b>MACE:</b><br>*2 carrier: Not significant.<br><b>Stent thrombosis:</b><br>*2 carrier: OR: 2.65 (1.46-4.84)                                                                                                                                                                                      | Yamaguchi, <i>et al.</i> 2012 (152) |
| Meta-analysis of <i>CYP2C19</i> *2 and <i>ABCB1</i> c.3435C>T:<br>- 14 studies<br>- 19,601 total patients                                                                     |                | <b>MACE:</b><br>*2 carrier: RR: 1.28 (1.06-1.54)<br><b>Cardiac mortality:</b><br>*2 carrier: RR: 3.21 (1.65–6.23)                                                                                                                                                                                 | Singh, <i>et al.</i> 2012 (153)     |

|                   |  |                                                                                                  |  |
|-------------------|--|--------------------------------------------------------------------------------------------------|--|
| - established CAD |  | <b>MI:</b><br>*2 carrier: RR: 1.36 (1.12-1.65)<br><b>ST:</b><br>*2 carrier: RR: 2.41 (1.69-3.41) |  |
|-------------------|--|--------------------------------------------------------------------------------------------------|--|

CAD: coronary artery disease; GOF: gain-of-function; HR: hazard ratio; LOF: loss-of-function; MACE: major adverse cardiovascular event; MI: myocardial infarction; OR: odds ratio; PPI: proton pump inhibitor; RR: relative risk; ST: stent thrombosis.

\* See above for description of ‘**Levels of Evidence Linking Genotype to Phenotype**’.
