# Supplementary material
Source: PubMed Central journal article supplement (PMC3748366)
Supplement: clpt2013105x9.pdf [file clpt2013105x9.pdf]

**Supplemental Table S8. Evidence linking *CYP2C19* genotype with phenotype (CLOPIDOGREL DOSE ESCALATION)**

| <b>Study Endpoints</b>                                           | <b>Major Findings</b>                                                                                                                                                             | <b>References</b>                                                                                                                                                                                                                                                                                             | <b>Level of Evidence*</b> |
|------------------------------------------------------------------|-----------------------------------------------------------------------------------------------------------------------------------------------------------------------------------|---------------------------------------------------------------------------------------------------------------------------------------------------------------------------------------------------------------------------------------------------------------------------------------------------------------|---------------------------|
| <i>Ex vivo</i> platelet aggregation                              | Higher-dose clopidogrel can increase the degree of platelet inhibition in healthy subjects heterozygous for <i>CYP2C19</i> LOF alleles                                            | Simon, <i>et al.</i> 2011 (57)                                                                                                                                                                                                                                                                                | High                      |
| <i>Ex vivo</i> platelet aggregation                              | Higher-dose clopidogrel can increase the degree of platelet inhibition in patients heterozygous for <i>CYP2C19</i> LOF alleles but less so in patients homozygous for LOF alleles | Gladding, <i>et al.</i> 2008 (154),<br>Gladding, <i>et al.</i> 2009 (40),<br>Barker, <i>et al.</i> 2010 (155),<br>Bonello, <i>et al.</i> 2010 (156),<br>Alexopoulos, <i>et al.</i> , 2011 (157),<br>Collet, <i>et al.</i> 2011 (114),<br>Cuisset, <i>et al.</i> 2011 (122),<br>Mega, <i>et al.</i> 2011 (158) | High                      |
| Clinical: composite end point of cardiovascular death, MI and ST | Higher dose clopidogrel on the basis of platelet function monitoring does not result in clinical benefit among ACS/PCI patients.                                                  | Price, <i>et al.</i> 2011 (159),<br>Collet, <i>et al.</i> 2012 (160)                                                                                                                                                                                                                                          | High                      |

ACS: acute coronary syndrome; LOF: loss-of-function; PCI: percutaneous coronary intervention.

\* See above for description of ‘**Levels of Evidence Linking Genotype to Phenotype**’
